# Supplementary material for: Perceptions of cigarette pack inserts promoting cessation and dissuasive cigarettes among young adult smokers in the UK: a cross-sectional online survey
Source: PubMed Central journal article supplement — BMJ Open. 2018 Sep 5;8(9):e019662. doi: 10.1136/bmjopen-2017-019662 (PMC6129040; doi:10.1136/bmjopen-2017-019662), 2018-09-05
Supplement: bmjopen-2017-019662.draft_revisions.pdf [file bmjopen-2017-019662.draft_revisions.pdf]

# BMJ Open

BMJ Open is committed to open peer review. As part of this commitment we make the peer review history of every article we publish publicly available.

When an article is published we post the peer reviewers' comments and the authors' responses online. We also post the versions of the paper that were used during peer review. These are the versions that the peer review comments apply to.

The versions of the paper that follow are the versions that were submitted during the peer review process. They are not the versions of record or the final published versions. They should not be cited or distributed as the published version of this manuscript.

BMJ Open is an open access journal and the full, final, typeset and author-corrected version of record of the manuscript is available on our site with no access controls, subscription charges or pay-per-view fees (<http://bmjopen.bmj.com>).

If you have any questions on BMJ Open's open peer review process please email [info.bmjopen@bmj.com](mailto:info.bmjopen@bmj.com)

# BMJ Open

## Young adult smokers' perceptions of cigarette pack inserts promoting cessation and dissuasive cigarettes: An online survey

|                                 |                                                                                                                                                                                                              |
|---------------------------------|--------------------------------------------------------------------------------------------------------------------------------------------------------------------------------------------------------------|
| Journal:                        | <i>BMJ Open</i>                                                                                                                                                                                              |
| Manuscript ID                   | bmjopen-2017-019662                                                                                                                                                                                          |
| Article Type:                   | Research                                                                                                                                                                                                     |
| Date Submitted by the Author:   | 19-Sep-2017                                                                                                                                                                                                  |
| Complete List of Authors:       | Moodie, Crawford; University of Stirling, Institute for Social Marketing<br>Hiscock, Rosemary; University of Bath, ; 1973<br>Thrasher, Jim; University of South Carolina<br>Reid, Garth; NHS Health Scotland |
| <b>Primary Subject Heading</b>: | Smoking and tobacco                                                                                                                                                                                          |
| Secondary Subject Heading:      | Public health                                                                                                                                                                                                |
| Keywords:                       | Smoking, Packaging, Inserts, Cigarettes                                                                                                                                                                      |
|                                 |                                                                                                                                                                                                              |

SCHOLARONE™  
Manuscripts

1  
2  
3 **Title:** Young adult smokers' perceptions of cigarette pack inserts promoting cessation and  
4  
5 dissuasive cigarettes: An online survey  
6  
7

8  
9 **Authors:** Crawford Moodie<sup>1</sup>, Rosemary Hiscock<sup>2</sup>, Jim Thrasher<sup>3</sup>, Garth Reid<sup>4</sup>  
10  
11

12  
13 **Affiliations:**  
14

15  
16 <sup>1</sup> Institute for Social Marketing, Faculty of Health Sciences and Sport, University of Stirling,  
17  
18 Stirlingshire, Scotland  
19

20 <sup>2</sup> Department for Health, University of Bath, England  
21

22 <sup>3</sup> Health Promotion, Education, and Behavior, Arnold School of Public Health, University of  
23  
24 South Carolina, Columbia, United States  
25

26 <sup>4</sup> Policy Evaluation, NHS Health Scotland, Edinburgh, Scotland  
27  
28  
29  
30

31 **Corresponding author:** Crawford Moodie, Institute for Social Marketing, Department of  
32  
33 Health Sciences and Sport, University of Stirling, Stirlingshire, Scotland FK9 4LA. Tel: +44  
34  
35 (0)1786 466456. Email: [c.s.moodie@stir.ac.uk](mailto:c.s.moodie@stir.ac.uk)  
36  
37  
38

39 **Keywords:** Smoking, Packaging, Inserts, Cigarettes  
40  
41  
42  
43

44 **Word count:** 4596  
45  
46  
47  
48  
49  
50  
51  
52  
53  
54  
55  
56  
57  
58  
59  
60

1  
2  
3 **Young adult smokers' perceptions of cigarette pack inserts promoting cessation and**  
4 **dissuasive cigarettes: An online survey**  
5  
6  
7  
8

9 **ABSTRACT**

10  
11 **Objectives:** To explore young adult smokers' perceptions of cigarette pack inserts promoting  
12 cessation and cigarettes designed to be dissuasive.  
13

14  
15  
16 **Design:** Cross-sectional online survey.

17  
18 **Setting:** United Kingdom.

19  
20 **Participants:** Of the 1970 young adult smokers recruited, the final sample was 1766  
21 (89.6%); 50.3% were male and 71.6% white British. To meet the inclusion criteria  
22 participants had to be 16-34 years old and smoke factory-made cigarettes.  
23  
24

25  
26 **Primary and secondary outcome measures:** Salience of inserts, perceptions of inserts as  
27 information provision, perceptions of inserts on quitting, support for inserts, and perceived  
28 appeal, harm and trial of three cigarettes (a standard cigarette, a standard cigarette displaying  
29 the warning 'Smoking kills' on the cigarette paper, and a green cigarette).  
30  
31

32  
33 **Results:** Half the sample indicated that they would read inserts with three-fifths indicating  
34 that they be a good way to provide information about quitting (61%). Just over half the  
35 sample indicated that inserts would make them think more about quitting (53%), help if they  
36 decided to quit (52%), are an effective way of encouraging smokers to quit (53%), and  
37 supported having them in all packs (55%). Participants who smoked factory-made cigarettes  
38 and other tobacco products (compared to exclusive factory-made cigarette smokers), had  
39 made a quit attempt within the last six months (compared to those that had never made a quit  
40 attempt), or were likely to make a successful quit attempt in the next six months (compared to  
41 those unlikely to make a quit attempt in the next six months), were more likely to indicate  
42 that inserts could assist with cessation. Multivariable logistic regression modelling suggested  
43  
44  
45  
46  
47  
48  
49  
50  
51  
52  
53  
54  
55  
56  
57  
58  
59  
60

1  
2  
3 that the two dissuasive cigarettes were considered much less desirable (less appealing, more  
4  
5 harmful, less likely to be tried) than the standard cigarette.

6  
7 **Conclusions:** Inserts and dissuasive cigarettes offer policy makers additional ways of using  
8  
9 the pack to reduce smoking.  
10

### 11 12 13 **Strengths and limitations of this study**

- 14  
15     ▪ The main strength of this study is that it allows an insight into how young adult  
16  
17 smokers perceive two innovative tobacco control measures (pack inserts promoting  
18  
19 cessation and dissuasive cigarettes).  
20  
21
- 22     ▪ The main limitations are that the study does not provide any insight into actual smoking  
23  
24 behaviour, the novelty of the stimuli and forced exposure to this, and the use of self-  
25  
26 selection.  
27  
28  
29  
30  
31  
32  
33  
34  
35  
36  
37  
38  
39  
40  
41  
42  
43  
44  
45  
46  
47  
48  
49  
50  
51  
52  
53  
54  
55  
56  
57  
58  
59  
60

## INTRODUCTION

While packaging remains a key marketing driver for tobacco companies, more than 100 countries now require pictorial health warnings on cigarette packs,<sup>1</sup> which can limit pack appeal.<sup>2</sup> Some countries have gone even further by implementing plain (or standardised) packaging, which severely reduces the promotional power of the pack. The United Kingdom (UK) became the third country to fully implement standardised packaging in May 2017, following Australia in December 2012 and France in January 2017. In the UK all cigarette packs must be drab brown with pictorial warnings on 65% of the front and back of packs and additional health messages on 50% of the sides of the pack. Although these changes have reduced the ability of tobacco companies to use the pack to create favourable perceptions of the brand and of smoking, there is clearly more scope for using the packaging to dissuade consumers. Regulators and academics have typically focused on the exterior of the cigarette pack, with little consideration of how the pack interior, for instance pack inserts or cigarettes, could potentially be used to encourage smokers to think about their smoking behaviour. This is the focus of our study.

Tobacco companies have used the inside of the cigarette pack to communicate with consumers since the late 19th century, via cigarette cards, coupons and promotional inserts. Only in Canada are they required, by law, to include pack inserts with health messaging. Sixteen text-only inserts were required in packs between 2000 and 2012, with nine encouraging cessation and seven providing health risk information.<sup>3</sup> These were replaced with eight new inserts, with coloured graphics and tips about quitting or the benefits of doing so, in 2012. Few studies have explored perceptions of pack inserts,<sup>4-8</sup> with only two assessing smokers' perceptions of, and responses to, the inserts used in Canada.<sup>9-11</sup> In focus group research in Scotland,<sup>9</sup> with smokers aged 16 and over who were shown seven of the inserts used in Canada, the general view was that they would capture attention and be read due to

1  
2  
3 their novelty and visibility when opening the pack. The positive messaging was liked and  
4  
5 thought to increase message engagement. The inserts were often preferred to the on-pack  
6  
7 warnings, although both were deemed necessary. Some participants suggested that inserts  
8  
9 could encourage them to stop smoking, and they were generally considered to have the  
10  
11 potential to alter the behaviour of younger people, would-be smokers and those wanting to  
12  
13 quit.<sup>9</sup> In Canada, a longitudinal online survey with smokers aged 18 and over found that  
14  
15 between 26% and 31% at each wave reported having read pack inserts at least once in the  
16  
17 prior month; those intending to quit or having recently tried to do so were significantly more  
18  
19 likely to have read them.<sup>10</sup> In addition, while reading warnings on the pack exterior decreased  
20  
21 over time, reading pack inserts increased over time, with more frequent reading  
22  
23 independently associated with self-efficacy to quit, quit attempts, and sustained quitting at  
24  
25 follow-up.<sup>11</sup>  
26  
27

28  
29 The cigarette itself is also an important communications tool,<sup>12,13</sup> which has long been  
30  
31 used by tobacco companies as a marketing device but has yet to be used by regulators to deter  
32  
33 smoking. As cigarettes are primarily responsible for tobacco related mortality and morbidity  
34  
35 and predicted to continue to dominate the global market for some time yet,<sup>14</sup> research  
36  
37 exploring the potential impact of standardising the appearance of cigarettes to make them less  
38  
39 desirable is long overdue. Some recent research has examined consumer perceptions of  
40  
41 'dissuasive' cigarettes, including unattractively coloured cigarettes,<sup>15,16</sup> cigarettes with the  
42  
43 warning 'Smoking kills' on the cigarette paper,<sup>17,18</sup> and cigarettes displaying the 'minutes of  
44  
45 life lost due to smoking' on the cigarette paper.<sup>19</sup> In each of these studies the dissuasive  
46  
47 cigarettes were generally viewed more negatively than regular cigarettes. For instance, a  
48  
49 qualitative study with young women smokers in New Zealand found that unattractively  
50  
51 coloured cigarettes, particularly green or brown coloured cigarettes, were perceived as more  
52  
53 harmful than other cigarettes, with it less likely that they or others their age would want to  
54  
55  
56  
57  
58  
59  
60

1  
2  
3 use them.<sup>15</sup> An in-home survey in the UK with 11-16 year olds, who were shown an image of  
4 a cigarette stick displaying ‘Smoking kills’, found that 53% indicated that this would make  
5 people want to give up smoking, 71% indicated that it would put people off starting to smoke,  
6 and 85% supported having a warning on all cigarettes.<sup>18</sup>  
7  
8  
9  
10

11 In this study our objective was to explore, for the first time, young adult smokers’  
12 perceptions of pack inserts and dissuasive cigarettes (a cigarette displaying the warning  
13 ‘Smoking kills’ and a green coloured cigarette).  
14  
15  
16  
17  
18  
19

## 20 **METHODS**

### 21 **Design and sample**

22  
23  
24 An online survey was conducted in January-February 2016 with smokers aged 16-34 years  
25 old in the UK; an online survey is a suitable approach for this age group given that 99% of  
26 16-34 year olds in the UK are recent internet users.<sup>20</sup> The sample was recruited by online  
27 market research company ‘Research Now’ ([www.researchnow.com](http://www.researchnow.com)). The inclusion criteria  
28 were that participants were factory-made cigarette smokers and aged 16-34 years. After  
29 Research Now excluded those who had completed the survey in less than the minimum  
30 completion time, which they had set prior to data collection commencing (n=193), and those  
31 providing responses to open-ended questions that indicated that they had not taken the survey  
32 seriously (n=11), the final sample was 1766 (89.6%). The final sample was 50.3% male, with  
33 53.9% aged 25-34 years and 71.6% white British. Most participants smoked 10 or less  
34 cigarettes per day, with 46.0% exclusive factory-made cigarette smokers (see Table 1 for  
35 sample and smoking-related characteristics).  
36  
37  
38  
39  
40  
41  
42  
43  
44  
45  
46  
47  
48  
49  
50  
51  
52  
53  
54  
55  
56  
57  
58  
59  
60

Table 1 here



## Procedure

An email invite was sent by Research Now to their online panel in the UK; Research Now is an established online market research company with their panel recruited from a range of internet sites, advertising and partnerships with other websites. Those eligible for inclusion were presented with an information page explaining the study aim (to explore what young adult smokers thought about cigarettes and pack inserts), and relevant ethical information (their right to withdraw at any time, assurances of confidentiality and anonymity, and contact details if they had any concerns). They were then presented with a consent page, with consent required for participation. Survey questions were presented in the same order for all participants, except the questions exploring perceptions of the three cigarettes (standard cigarette, warning cigarette, green cigarette), where the ordering was randomised; the ordering of the presentation of the three cigarettes (shown in Figure 1) was also randomised. There was no missing data as participants could only proceed to the next question if they had provided an answer to the previous question.

Figure 1 here

For each of the inserts questions participants were shown an image of one of four inserts, see Figure 2, chosen from the eight used in Canada as they were considered most relevant to our sample. The words 'Health Canada' were removed from the bottom of each insert to make them more relevant for participants in the UK. The median time for survey completion was 9 minutes 28 seconds. Participants received a nominal incentive for participation, as is common for online panels. The study received ethical approval from the School of Health Sciences Ethics Committee at the University of Stirling.

1  
2  
3  
4  
5 Figure 2 here  
6  
7  
8

9 **Measures**  
10

11  
12  
13 *Inserts: Salience and information provision*  
14

15 Participants were asked 'If this type of insert was in your cigarette pack, do you think that  
16 you would read it?' and 'If this type of insert was in your cigarette pack, do you think that  
17 you would read it if you were interested in quitting?' They were also asked 'Do you think  
18 that inserts would be a good way to provide information to smokers about quitting?'  
19  
20  
21  
22

23 Response options for each were 'Yes', 'No' and 'Not sure'.  
24  
25  
26  
27

28  
29 *Inserts: Cessation*  
30

31 Three questions assessed to what extent participants agreed or disagreed that inserts would  
32 make them think about quitting, and help them quit: 'Do you agree or disagree that having  
33 these types of inserts in every cigarette pack would make you think more about quitting?',  
34  
35 'Do you agree or disagree that having these types of inserts in every cigarette pack might help  
36 you if you decided to quit?', and 'Do you agree or disagree that having these types of inserts  
37 inside every cigarette pack would be an effective way of helping smokers who want to quit?'  
38  
39  
40  
41  
42

43 Response options for each were 'Strongly disagree', 'Disagree', 'Neither agree nor disagree',  
44  
45 'Agree', 'Strongly agree' and 'Don't know'.  
46  
47  
48  
49

50 *Inserts: Support*  
51

52 A five-point semantic scale assessed support, with anchors 'All cigarette packs should have  
53 inserts like this in them-No cigarette packs should have inserts like this in them'.  
54  
55  
56  
57

### *Cigarette design: Appeal, harm and trial*

Seven-point semantic scales assessed appeal, harm and likely trial. Appeal was assessed via four scales, with anchors 'Attractive-Unattractive', 'Stylish-Not stylish', 'Not nice to be seen with-Nice to be seen with' and 'Not appealing to people my age-Appealing to people my age'. Harm was assessed via two scales, with anchors 'Looks harmful to health-Does not look harmful to health' and 'Makes me think about the dangers of smoking-Does not make me think about the dangers of smoking'. Likely trial was assessed via two scales, 'If a friend offered you each of these cigarettes, how likely would you be to try them?' and 'If someone your age who had never smoked before was going to try a cigarette, how likely do you think they would be to try each of these cigarettes?' Both scales assessing trial ranged from 'Not at all likely' to 'Very likely'.

### *Sociodemographic characteristics*

Age, gender, ethnicity, educational attainment and economic status (based on chief income earner) were obtained. A count procedure was used to create a variable for low socioeconomic status (SES): low education (General Certificate of Secondary Education: GCSE or below) and/or low economic status (routine or manual occupation, long-term unemployed or long-term sick or disabled).

### *Smoking behaviour*

Smoking status was assessed with 'Which of these best describes you?' with response options: 'I have never smoked', 'I used to smoke, but don't now', 'I smoke, but not every day', and 'I smoke every day'. Type of products used was assessed with 'What type(s) of tobacco products do you smoke?' with response options: 'Only factory-made (packet)

1  
2  
3 cigarettes', 'Factory-made and roll-your-own cigarettes', 'Factory-made cigarettes and other  
4 tobacco products (e.g. cigars, shisha, etc)', 'Only roll-your-own cigarettes' and 'Only other  
5 tobacco products (e.g. cigars, shisha, etc)'. The Heaviness of Smoking Index (HSI)<sup>21</sup> was  
6 used as a measure of dependence, based on daily consumption and time to first cigarette.  
7  
8  
9

### 10 11 12 13 *Quitting and self-efficacy*

14  
15 Participants were asked 'Have you ever made an attempt to quit smoking that lasted at least  
16 24 hours?' (Yes within the last six months, Yes more than six months ago, I have never tried  
17 to quit for more than 24 hours). They were also asked 'How likely are you to try to quit  
18 smoking within the next six months?' (Not at all, A little, Moderately, Very, Extremely,  
19 Don't know), with those responding 'Not at all', 'A little', 'Moderately' or 'Don't know'  
20 classified as 'Unlikely to make a quit attempt in the next six months'. To measure quitting  
21 self-efficacy, participants were asked 'If you decided to quit smoking in the next six months,  
22 how sure are you that you would succeed?' (Not at all, A little, Moderately, Very, Extremely,  
23 Don't know). Those who responded to the likelihood of quitting question with 'Very or  
24 'Extremely' and to the quitting efficacy question with 'Not at all', 'A little', 'Moderately' or  
25 'Don't know' were classified as 'unlikely to make a successful quit attempt in the next six  
26 months'. Those who responded 'Very' or 'Extremely' to both questions were classified as  
27 'likely to make a successful quit attempt in the next six months'.  
28  
29  
30  
31  
32  
33  
34  
35  
36  
37  
38  
39  
40  
41  
42  
43  
44  
45

### 46 **Analysis**

47  
48 Data was analysed using Microsoft office Excel 2013, SPSS v22 and v23 and MIWin v2.33.<sup>22</sup>  
49  
50 The insert variables were dichotomised into yes/agreement and no/disagreement/neutral/not  
51 sure/don't know. The dichotomised insert variables were the outcomes of the logistic  
52 regression models. The independent variables were gender, age, education, ethnicity,  
53  
54  
55  
56  
57  
58  
59  
60

1  
2  
3 dependence (tertiles of HSI), tobacco product(s) smoked, previous quit attempt lasting 24  
4 hours, and likely efficacy of a quit attempt in the next six months. Percentages in agreement  
5 were calculated. Age, gender and education (as a measure of SES) were entered into all  
6 models to account for any sampling inadequacies. Other variables were entered where  $p < 0.10$   
7 in chi square tests.  
8  
9  
10  
11  
12

13 The cigarette variables were assessed using seven-point semantic scales, with  
14 percentages calculated for those indicating one of the three points nearest the undesirable  
15 anchor (e.g. unattractive, not nice to be seen with, looks harmful to health). Differences  
16 between the three cigarettes were tested using Cochran's Q and pairwise comparisons. A  
17 factor analysis of the eight perception variables, collated for all three cigarettes, was  
18 undertaken, with checks indicating that the data was suitable for factor analysis (Kaiser  
19 Meyer Olkin=0.845, Bartlett's test of sphericity (approx. chi-square 18062.842,  $df=276$ ,  
20  $p < 0.001$ ), with no correlations between the variables  $> 0.9$ ). The extraction method used was  
21 Principal Axis Factoring and the criteria for extraction was eigenvalues  $> 1$ . All eight variables  
22 loaded on a single factor  $> 0.5$ . High factor scores indicated that a cigarette was desirable and  
23 low scores that it was undesirable. Visual inspection and the Kolmogorov-Smirnov test  
24 indicated that the factor was non-normal (because responses for the dissuasive cigarettes  
25 indicated they were undesirable generally) and attempts to normalise it using normit rankit  
26 methods failed. Thus the factor was divided into tertiles and the tertile indicating undesirable  
27 factor scores was compared with the other two tertiles. This was the outcome variable in  
28 regression analysis.  
29  
30  
31  
32  
33  
34  
35  
36  
37  
38  
39  
40  
41  
42  
43  
44  
45  
46  
47

48 Multilevel logistic regression modelling, with second order PQL linearization, was  
49 undertaken with cigarette type (at level one) clustered with individual participants (at level  
50 two). All models included cigarette type as a fixed effect where the standard cigarette was  
51 compared with the warning cigarette and green cigarette. Other fixed effects at the individual  
52  
53  
54  
55  
56  
57  
58  
59  
60

(participant) level were sociodemographic and smoking-related characteristics. This main effects model tested which characteristics were associated with perceiving cigarettes as desirable. In order to understand which characteristics differentiated the desirability of the three types of cigarettes, interactions between cigarette type and each significant characteristic were tested. One interaction was found. Interacting variables were substituted by a cross classified variable (derived from cigarette type and the variable with which cigarette type significantly interacted). The reference category of the cross classified variable was varied in order to understand the interaction.

## RESULTS

### Perceptions of inserts

Half the sample indicated that they would read inserts, with approximately three-fifths indicating that they would read them if interested in quitting (60%), and that they would be a good way to provide information about quitting (61%). Just over half strongly agreed/agreed that inserts may make them think more about quitting (53%), help them if they decided to quit (52%), that they are an effective way of encouraging smokers to quit (53%), and that all cigarette packs should have inserts (55%), see Table 2.

Table 2 here

### Sociodemographic differences in perceptions of inserts

Women were more likely than men to indicate that they would read inserts (aOR=1.24; 95%CI 1.02-1.50), and 25-34 year olds less likely than 16-19 year olds to think that they were a good way of providing information about quitting (aOR=0.76; 95%CI 0.60-0.98).

1  
2  
3 Compared with white British participants, white non-British (aOR=0.70; 95%CI 0.50-0.98)  
4 and Asian (aOR=0.67; 95%CI 0.49-0.92) participants were less likely to suggest that they  
5 would read inserts if trying to quit, white non-British (aOR=0.58; 95%CI 0.41-0.81) and  
6 Black (aOR=0.61; 95%CI 0.38-0.98) participants were less likely to indicate that inserts  
7 would make them think about quitting, and white non-British (aOR=0.62; 95%CI 0.44-0.87)  
8 and Asian (aOR=0.70; 95%CI 0.51-0.96) participants were less likely to support having  
9 inserts in all packs, see Table 3a.  
10  
11  
12  
13  
14  
15  
16  
17  
18  
19

### 20 **Smoking-related differences**

21  
22 Compared to exclusive factory-made cigarette smokers, those who also smoked roll-your-  
23 own cigarettes were more likely to indicate they would read inserts (aOR=1.35; 95%CI 1.09-  
24 1.66), read them if trying to quit (aOR=1.61; 95%CI 1.30-2.00), that they would make them  
25 think about quitting (aOR=1.31; 95%CI 1.06-1.62), help them if they decided to quit  
26 (aOR=1.31; 95%CI 1.06-1.61), and that they would be an effective way of encouraging  
27 smokers to quit (aOR=1.27; 95%CI 1.03-1.56). Compared to exclusive factory-made  
28 cigarette smokers, those who also smoked other tobacco products (e.g. cigars, shisha) were  
29 more likely to indicate they would read inserts if trying to quit (aOR=1.39; 95%CI 1.04-1.86)  
30 and that inserts might help them if they decided to quit (aOR=1.34; 95%CI 1.01-1.78).  
31  
32  
33  
34  
35  
36  
37  
38  
39  
40

41 Participants who had made a quit attempt more than six months ago (aOR=1.30;  
42 95%CI 1.00-1.69), or within the last six months (aOR=1.67; 95%CI 1.29-2.15), were more  
43 likely to indicate that they would read inserts than those who had never made a quit attempt.  
44 Those who had made a quit attempt in the last six months were also more likely than those  
45 who had never made a quit attempt to indicate that inserts were a good way to provide  
46 information about quitting (aOR=1.54; 95%CI 1.20-1.98), that they would read them if trying  
47 to quit (aOR=1.51; 95%CI 1.17-1.94), make them think about quitting (aOR=1.46; 95%CI  
48  
49  
50  
51  
52  
53  
54  
55  
56  
57  
58  
59  
60

1  
2  
3 1.14-1.88), help them if they decided to quit (aOR=1.35; 95%CI 1.05-1.73), and that they  
4  
5 would be an effective way of encouraging smokers to quit (aOR=1.33; 95%CI 1.04-1.71).  
6

7 Compared to those likely to make a successful quit attempt in the next six months,  
8  
9 those unlikely to make a quit attempt in the next six months were less likely to indicate that  
10  
11 they would read inserts (aOR=0.58; 95%CI 0.44-0.75), read them if trying to quit  
12  
13 (aOR=0.74; 95%CI 0.55-0.99), that they would make them think about quitting (aOR 0.59  
14  
15 (0.45 to 0.78), help them if they decided to quit (aOR=0.51; 95%CI 0.38-0.67), that they  
16  
17 would be effective for smokers if they decided to quit (aOR=0.55; 95%CI 0.41-0.73), or  
18  
19 support them (aOR=0.56; 95%CI 0.42-0.74). Compared to those likely to make a successful  
20  
21 quit attempt in the next six months, those unlikely to make a successful quit attempt in the  
22  
23 next six months were more likely to read inserts if trying to quit (aOR=1.43; 95%CI 1.00-  
24  
25 2.06), thought that they were a good way to provide information to smokers about quitting  
26  
27 (aOR=1.46; 95%CI 1.02-2.08), and support them (aOR=1.43; 95%CI 1.00-2.04), see Table  
28  
29 3b.  
30  
31  
32  
33  
34

35 Table 3 here  
36  
37  
38  
39

### 40 **Perceptions of cigarette design**

41 With respect to harm, participants were less likely to think that the standard cigarette (SC)  
42  
43 (38.8%) looked harmful than the warning cigarette (WC) (69.1%) or green cigarette (GC)  
44  
45 (70.2%) ( $p<0.001$ ), and that the SC (20.9%) made them think more about the dangers of  
46  
47 smoking than the WC (58.1%) or GC (53.5%) ( $p<0.001$ ). Participants were also more likely  
48  
49 to indicate that the WC would make them think of the dangers of smoking than the GC  
50  
51 ( $p=0.01$ ). In terms of appeal, participants were more likely to consider the SC (25.2%)  
52  
53 attractive than the WC (61.7%) or GC (68.7%) ( $p<0.001$ ), and the SC (37.4%) as stylish than  
54  
55  
56  
57  
58  
59  
60



1  
2  
3 the WC (66.0%) or GC (69.4%) ( $p<0.001$ ). The SC (19.8%) was also considered to be nicer  
4  
5 to be seen with than the WC (55.2%) or GC (60.2%) ( $p<0.001$ ), and the SC (17.8%) was  
6  
7 viewed as not as appealing to people their age as the WC (51.5%) or GC (57.4) ( $p<0.001$ ). In  
8  
9 terms of trial, 79.4% indicated that they would try a SC if offered by a friend (35.7% WC,  
10  
11 21.5% GC), and 70.1% indicated that a never smoker their age would be most likely to try a  
12  
13 SC (21.1% WC, 16.5% GC) (both  $p<0.001$ ).  
14  
15

### 16 17 18 **Perceptions of cigarette desirability**

19  
20 Main effects multivariable logistic regression modelling suggested that in comparison to the  
21  
22 SC, the WC (aOR=17.71; 95%CI 13.75-22.80) and GC (aOR=30.88; 95%CI 23.98-39.76)  
23  
24 were much more likely to be perceived as undesirable (i.e. less appealing, more harmful, less  
25  
26 likely to be tried). The model also indicated which smokers were more likely to rate the  
27  
28 cigarettes as undesirable: women were more likely than men (aOR=1.30; 95%CI 1.10-1.54),  
29  
30 and low SES more likely than those not low SES (aOR=1.26; 95%CI 1.06-1.50), to consider  
31  
32 all three cigarettes undesirable. Compared to exclusive factory-made cigarette smokers, those  
33  
34 who also smoked roll-your-own cigarettes (aOR=0.78; 95%CI 0.65-0.93) or other tobacco  
35  
36 products (aOR=0.73; 95%CI 0.56-0.93) were less likely to consider all three cigarettes  
37  
38 undesirable. Those not likely to make a quit attempt in the next six months were less likely  
39  
40 than those likely to make a quit attempt in the next six months (aOR=0.62; 95%CI 0.49-0.78)  
41  
42 to consider all three cigarettes undesirable.  
43  
44  
45

46  
47 Only one significant interaction, between cigarette type and SES, was found. Both  
48  
49 SES groups perceived the WC significantly more undesirable than the SC, and the GC  
50  
51 significantly more undesirable than the WC. Low SES were significantly more likely than  
52  
53 those not low SES to perceive the SC (aOR=17.71; 95%CI 13.75-22.80) and GC  
54  
55 (aOR=30.88; 95%CI 23.98-39.76) as undesirable; there was no difference for the WC  
56  
57  
58  
59  
60

1  
2  
3 (aOR=0.99; 95%CI 0.78-1.25), see Figure 3.  
4  
5

6  
7 Table 4 here  
8  
9

## 10 11 **DISCUSSION**

12  
13 Our findings suggest that inserts highlighting the benefits of quitting or providing tips on how  
14 to do so may have the potential to encourage cessation, and dissuasive cigarettes may help to  
15 reduce the desirability of smoking. Greater attention to how the interior of the cigarette pack  
16 could be used to promote cessation appears warranted.  
17  
18  
19  
20

21  
22 Health messages need to capture attention to be effective.<sup>23</sup> In this regard, at least half  
23 our sample indicated that they would read inserts (50%) and read them if interested in  
24 quitting (60%). In Canada, observational studies found that approximately a quarter of  
25 smokers reported reading them at least once within the last month,<sup>10</sup> increasing to about one-  
26 third of smokers over two years of follow-up.<sup>11</sup> As in our study, smokers in Canada who had  
27 read/would read the inserts were more likely to be female, intend to quit or had recently tried  
28 to quit; in our study, they were also more likely to be white British, have moderate  
29 dependence, and use factory-made cigarettes and other tobacco products. Future research  
30 could explore why dual users (smokers of factory-made cigarettes and other tobacco  
31 products) were more likely to indicate that they would read inserts, but as inserts are typically  
32 only found in cigarette packs then for those who use other tobacco products they may be seen  
33 as more of a novelty and therefore more likely to capture attention.  
34  
35  
36  
37  
38  
39  
40  
41  
42  
43  
44  
45  
46  
47

48 Approximately three-fifths (61%) of smokers in our study thought that inserts were a  
49 good way to provide information about quitting to smokers, with only 25% disagreeing. In  
50 comparison, an earlier study in Canada, commissioned by Health Canada, found that 48% of  
51 smokers indicated that messaging on inserts was a good way to provide information to  
52  
53  
54  
55  
56  
57  
58  
59  
60

1  
2  
3 smokers, with 47% disagreeing.<sup>5</sup> Just over half our sample agreed/strongly agreed that inserts  
4 may make them think more about quitting, help them if they decided to quit, and that they are  
5 an effective way of encouraging smokers to quit, whereas in New Zealand only 34% of  
6 smokers and recent quitters agreed/strongly agreed that inserts would be an effective way of  
7 encouraging reduced consumption or quitting.<sup>6</sup> There may be various reasons for the  
8 differences between our findings and earlier research. For instance, when this earlier research  
9 was conducted cigarette packs displayed text-only health warnings and it may be that having  
10 pictorial warnings on packs, as is required in Scotland, may prompt smokers to look for  
11 information on how to quit and the benefits of doing so. Insert design is also likely to be  
12 relevant. Whereas the inserts used in earlier research were limited to text, the inserts used in  
13 this study (which have been used in Canada since 2012) included coloured graphics, which  
14 likely enhanced their impact. This would be consistent with the health communications and  
15 warnings literature, which demonstrates the importance of supporting text with  
16 pictorials.<sup>2,23,24</sup> Future research exploring insert design (e.g. use of imagery, inclusion of  
17 cessation resource information, length and framing of messages, etc) would be of value.

18  
19  
20  
21  
22  
23  
24  
25  
26  
27  
28  
29  
30  
31  
32  
33  
34  
35 More than half our sample supported the inclusion of inserts promoting cessation  
36 inside every cigarette pack, with only a fifth opposing this. Within the European Union, the  
37 recent Tobacco Products Directive (TPD)<sup>25</sup> does not require tobacco companies to include  
38 health communication inserts in packs, but allows member states to introduce measures  
39 beyond those specified. Among governmental representatives that responded to the  
40 consultation on the revision of the TPD there was strong support for improving consumer  
41 information via mandatory pictorial warnings, with those supportive arguing that additional  
42 information, such as pack inserts, would help to deliver more accurate health information.<sup>26</sup> If  
43 there is support for inserts among governmental representatives, and little opposition among  
44 smokers (the group most likely to be resistant), they are clearly a viable option for regulators.

1  
2  
3 Tobacco industry journals describe the cigarette as an increasingly important  
4  
5 advertising medium for tobacco companies.<sup>12</sup> However, until recently, the public health focus  
6  
7 has been on the potential of regulating the contents of cigarettes to reduce palatability or  
8  
9 addictiveness,<sup>27</sup> with little consideration of the possibility of regulating the appearance of  
10  
11 cigarettes to reduce its importance as a promotional tool. We found that the two dissuasive  
12  
13 cigarettes were perceived as significantly more harmful and less appealing than the standard  
14  
15 cigarette, and less likely to encourage trial. The harm, appeal and trial items loaded onto a  
16  
17 single ‘undesirability’ factor, with the dissuasive cigarettes considered much more  
18  
19 undesirable than the standard cigarette. The findings are consistent with earlier research,  
20  
21 where cigarettes with the warning ‘Smoking kills’ were considered a constant reminder of the  
22  
23 associated harms and, partly due to the perceived discomfort of being observed by others  
24  
25 smoking a cigarette displaying this message, unappealing for smokers.<sup>8,16,17,18</sup> Previous  
26  
27 studies have also found unattractively coloured cigarettes to be perceived as more harmful  
28  
29 than other cigarettes and also repellent, being a cigarette that young people did not think that  
30  
31 others their age would use.<sup>15,16,28,29</sup> As with the inserts, the dissuasive cigarettes (and also the  
32  
33 standard cigarette) were considered more desirable among dual users than exclusive factory-  
34  
35 made cigarette smokers; again it is not clear why this was the case but further research with  
36  
37 dual users, or indeed those also using vaping devices (not assessed in this study), would be  
38  
39 fruitful.  
40  
41  
42  
43

44 In terms of limitations, the cross-sectional design did not allow us to assess causality;  
45  
46 that inserts and dissuasive cigarettes are not available on the UK market prevents more robust  
47  
48 study designs such as longitudinal studies. Another potential limitation concerns the novelty  
49  
50 of the stimuli, which may have influenced responses, and forced exposure to the stimuli. In  
51  
52 addition, we only used four inserts, rather than the full set of eight used in Canada, which  
53  
54 includes inserts that be less relevant to our sample. While online surveys have been used for  
55  
56  
57  
58  
59  
60

1  
2  
3 previous research exploring cigarette packaging, inserts and dissuasive cigarettes,<sup>30-33</sup> and are  
4 a suitable survey mode for young adults, the use of an online panel and self-selection limits  
5 the representativeness of our sample. In addition, the use of semantic differential scales can  
6 be criticised because answers can be subject to various response biases, although we  
7 attempted to diminish these through varying scale item direction and through our multivariate  
8 modelling methodology.

9  
10  
11 It was argued, over two decades ago, that to offer greater protection to consumers  
12 cigarettes should come in plain packs with messaging on both the pack exterior and interior.<sup>34</sup>  
13 This idea is a step closer in the UK, although there will still be no messaging on the pack  
14 interior. That more than half of the participants in this study suggested that inserts may help  
15 to promote cessation suggests that their inclusion in packs may be a meaningful supplement  
16 to the on-pack warnings. Our findings suggest however that to offer the greatest protection to  
17 consumers, it may be beneficial to supplement plain packaging and inserts with cigarettes  
18 designed to be dissuasive. Unattractively coloured cigarettes would complement the  
19 unattractively coloured packs, just as warnings on the cigarette would extend the warnings on  
20 the cigarette pack. Both options are clearly viable.

21  
22  
23  
24  
25  
26  
27  
28  
29  
30  
31  
32  
33  
34  
35  
36  
37  
38  
39 **Contributors** CM designed the data collection tool and drafted and revised the paper. RH  
40 analysed the data and drafted the Analysis and Results. JF and GR helped design the data  
41 collection tool and commented on the paper. All authors read and approved the final  
42 manuscript.

43  
44  
45  
46  
47  
48 **Funding** This work was supported by Health Scotland. GR, who works for Health Scotland,  
49 provided feedback on the survey and paper, but was not involved in the collection, analysis  
50 and interpretation of the data.

51  
52  
53  
54 **Competing interests** GR works for Health Scotland, who funded this study.

1  
2  
3 **Ethics approval** The study obtained ethics approval from the School of Health Sciences  
4  
5 Ethics Committee at the University of Stirling. Participants provided informed consent before  
6  
7 participating.  
8

9 **Provenance and peer review** Not commissioned; externally peer reviewed.  
10

11 **Data sharing statement** No additional data are available.  
12  
13  
14  
15  
16  
17  
18  
19  
20  
21  
22  
23  
24  
25  
26  
27  
28  
29  
30  
31  
32  
33  
34  
35  
36  
37  
38  
39  
40  
41  
42  
43  
44  
45  
46  
47  
48  
49  
50  
51  
52  
53  
54  
55  
56  
57  
58  
59  
60

For peer review only

**REFERENCES**

1. Canadian Cancer Society. *Cigarette package health warnings. International status report (Fifth edition)*. [www.tobaccolabels.ca/wp/wp-content/uploads/2016/11/Cigarette-Package-Health-Warnings-International-Status-Report-English-CCS-Oct-2016.pdf](http://www.tobaccolabels.ca/wp/wp-content/uploads/2016/11/Cigarette-Package-Health-Warnings-International-Status-Report-English-CCS-Oct-2016.pdf) (accessed 10 Sept 2017).
2. Hammond D. Health warning messages on tobacco products: a review. *Tob Control* 2011;20:327–37.
3. Mahood G. *Canada's tobacco package label or warning system: "telling the truth" about tobacco product risks*. Geneva: WHO, 2010.
4. Tandemar Research Inc. *Tobacco health warning messages, inserts and toxic constituents information study - Final Report*. Toronto: Tandemar Research Inc, 1992.
5. Environics. *Health warning messages on the flip/side and inserts of cigarette packaging. A survey of smokers. A report prepared for Health Canada, 2000*.
6. BRC Marketing and Social Research. *Smoking health warnings study. Wellington: Ministry of Health, 2004*. [www.tobaccolabels.ca/wp/wp-content/uploads/2013/12/NZ-2004-Effectiveness-of-Different-Health-Warnings-in-Helping-People-Consider-Their-Smoking-Related-Behaviour-Government-Report.pdf](http://www.tobaccolabels.ca/wp/wp-content/uploads/2013/12/NZ-2004-Effectiveness-of-Different-Health-Warnings-in-Helping-People-Consider-Their-Smoking-Related-Behaviour-Government-Report.pdf) (accessed 12 Aug 2017).
7. Gallopel-Morvan K, Moodie C, Hammond D, *et al*. Consumer understanding of cigarette emission labelling. *Eur J Pub Health* 2011;21:373-5.
8. Moodie C. Novel ways of using tobacco packaging to communicate health messages: Interviews with packaging and marketing experts. *Addict Res Theory* 2016;24:54-61.
9. Moodie C. Adult smokers' perceptions of cigarette pack inserts promoting cessation: A focus group study. *Tob Control* (in press).

- 1  
2  
3 10. Thrasher JT, Osman A, Abad EN, *et al.* The innovative use of cigarette package  
4 inserts to supplement pictorial health warnings: An evaluation of the Canadian policy.  
5  
6  
7 *Nicot Tob Res* 2015;17:870-5.  
8
- 9  
10 11. Thrasher JF, Swayampakala K, Cummings KM, *et al.* Cigarette package inserts can  
11 promote efficacy beliefs and sustained smoking cessation attempts: A longitudinal  
12 assessment of an innovative policy in Canada. *Prev Med* 2016;88:59-65.  
13
- 14  
15 12. Rossell S. Ready to roll. *Tob Report* 2017;2:44-5.  
16
- 17  
18 13. Smith KC, Washington C, Welding K, *et al.* Cigarette stick as valuable  
19 communicative real estate: a content analysis of cigarettes from 14 low-income and  
20 middle-income countries. *Tob Control* 2017;26:604-7.  
21  
22
- 23  
24 14. Hedley D. Tobacco wars: A new hope - the changing future. *Tob J Int* 2015;3:31-4.  
25
- 26  
27 15. Hoek J, Robertson C. How do young adult female smokers interpret dissuasive  
28 cigarette cigarettes? *J Social Marketing* 2015;5:21-39.  
29
- 30  
31 16. Hoek J, Gendall P, Eckert C, *et al.* Dissuasive cigarette sticks: the next step in  
32 standardised ('plain') packaging? *Tob Control* 2016;15:699-705.  
33  
34
- 35  
36 17. Moodie C, Purves R, McKell J, *et al.* Novel means of using cigarette packaging and  
37 cigarettes to communicate health risk and cessation messages: A qualitative study.  
38  
39  
40 *Internat J Mental Health Addiction* 2015;13:333-44.  
41
- 42  
43 18. Moodie C, Mackintosh AM, Gallopel-Morvan K, *et al.* Adolescents' perceptions of  
44 health warnings on cigarettes. *Nicot Tob Res* 2017;29:1232-7.  
45
- 46  
47 19. Hassan L, Shui E. No place to hide: two pilot studies assessing the effectiveness of  
48 adding a health warning to the cigarette cigarette. *Tob Control* 2015;24:e3-5.  
49
- 50  
51 20. ONS. *Internet users in the UK: 2017.*  
52  
53 [www.ons.gov.uk/businessindustryandtrade/itandinternetindustry/bulletins/internetuser](http://www.ons.gov.uk/businessindustryandtrade/itandinternetindustry/bulletins/internetuser)  
54  
55 [s/2017](http://www.ons.gov.uk/businessindustryandtrade/itandinternetindustry/bulletins/internetuser/s/2017) (accessed 15 Sept 2017).  
56  
57



- 1  
2  
3 21. Rasbash J, Browne W, Healy M, *et al.* *A user's guide to MLwiN, version 2.3*. Bristol:  
4 Centre for multilevel modelling, University of Bristol, 2015.  
5  
6  
7 22. Kozlowski LT, Porter CQ, Orleans T, *et al.* Predicting smoking cessation with self-  
8 reported measures of nicotine dependence: FTQ, FTND, and HSI. *Drug Alcohol*  
9 *Depend* 1994;34:211-6.  
10  
11  
12  
13 23. Wogalter MS, Conzola VC, Smith-Jackson TL. Research-based guidelines for  
14 warning design and evaluation. *Applied Ergonomics* 2002;33:219-30.  
15  
16  
17 24. Houts PD, Doak CC, Doak LG, *et al.* The role of pictures in improving health  
18 communication: A review of research on attention, comprehension, recall, and  
19 adherence. *Patient Educ Couns* 2006;61:173-90.  
20  
21  
22  
23 25. European Commission. Directive 2014/40/EU of the European parliament and of the  
24 Council of 3 April 2014 on the approximation of the laws, regulations and  
25 administrative provisions of the Member States concerning the manufacture,  
26 presentation and sale of tobacco and related products and repealing Directive  
27 2001/37/EC. *Official Journal of the European Union* 2014;L127:1-38.  
28  
29  
30  
31 26. European Commission. *Report on the public consultation on the possible revision of*  
32 *the Tobacco Products Directive (2001/37/EC)*. Health and Consumers Directorate-  
33 General – Directorate D – Health systems and products D4 – Substances of human  
34 origin and tobacco control, 2011.  
35  
36 [http://ec.europa.eu/health/tobacco/docs/consultation\\_report\\_en.pdf](http://ec.europa.eu/health/tobacco/docs/consultation_report_en.pdf) (accessed 10 Sept  
37 2017).  
38  
39  
40  
41  
42  
43  
44  
45  
46  
47  
48 27. Warner K. The national and international regulatory environment in tobacco control.  
49 *Pub Health Res Practice* 2015;25:e2531527.  
50  
51  
52  
53 28. Ford A, Moodie C, Mackintosh AM, *et al.* Adolescent perceptions of cigarette  
54 appearance. *Eur J Pub Health* 2014;24:464-8.  
55  
56  
57  
58  
59  
60

- 1  
2  
3 29. Moodie C, Ford A, Mackintosh AM, *et al.* Are all cigarettes just the same? Female's  
4 perceptions of slim, coloured, aromatised and capsule cigarettes. *Health Educ Res*  
5 2015;30:1-12.  
6  
7  
8  
9 30. Doxey J, Hammond D. Deadly in pink: The impact of female-oriented cigarette  
10 packaging among young women. *Tob Control* 2011;20:353-60.  
11  
12  
13 31. White CM, Hammond D, Thrasher JF, *et al.* The potential impact of plain packaging  
14 of cigarette products among Brazilian young women: an experimental study. *BMC*  
15 *Public Health* 2012;12:737.  
16  
17  
18  
19 32. Kotnowski K, Fong GT, Gallopel-Morvan K, *et al.* The impact of cigarette packaging  
20 design among young females in Canada: findings from a discrete choice experiment.  
21 *Nicot Tob Res* 2016;18:1348-56.  
22  
23  
24  
25  
26 33. Hoek J, Gendall P, Maubach N, *et al.* Strong public support for plain packaging of  
27 tobacco products. *Austr N Z J Pub Health* 2012;36:405-7.  
28  
29  
30  
31 34. Mahood G. Canada tobacco package warning system. *Tob Control* 1995;4:10-4.  
32  
33  
34  
35  
36  
37  
38  
39  
40  
41  
42  
43  
44  
45  
46  
47  
48  
49  
50  
51  
52  
53  
54  
55  
56  
57  
58  
59  
60

**Table 1:** Sample and smoking-related characteristics

| <i>Characteristic</i>                                            | <i>N</i> | <i>%</i> |
|------------------------------------------------------------------|----------|----------|
| Total                                                            | 1766     | 100.0    |
| <b>Age group</b>                                                 |          |          |
| 16-19                                                            | 413      | 23.4     |
| 20-24                                                            | 401      | 22.7     |
| 25-34                                                            | 952      | 53.9     |
| <b>Gender</b>                                                    |          |          |
| Male                                                             | 888      | 50.3     |
| Female                                                           | 878      | 49.7     |
| <b>Educational qualifications</b>                                |          |          |
| Other qualifications                                             | 1357     | 76.8     |
| None or GCSE                                                     | 409      | 23.2     |
| <b>Economic status</b>                                           |          |          |
| Other status                                                     | 1350     | 76.4     |
| Routine or manual occupation, unemployed or long term sick       | 416      | 23.6     |
| <b>Socioeconomic status (SES)</b>                                |          |          |
| No indicators of low SES                                         | 1114     | 63.1     |
| Low education and/or low SES                                     | 652      | 36.9     |
| <b>Ethnicity</b>                                                 |          |          |
| White British                                                    | 1264     | 71.6     |
| White non-British                                                | 162      | 9.2      |
| Black (including mixed black and white)                          | 79       | 4.5      |
| Asian (including mixed Asian and white)                          | 196      | 11.1     |
| Other or not declared                                            | 65       | 3.7      |
| <b>Location</b>                                                  |          |          |
| England                                                          | 1550     | 87.8     |
| Scotland                                                         | 109      | 6.2      |
| Wales                                                            | 73       | 4.1      |
| Northern Ireland                                                 | 34       | 1.9      |
| <b>Tobacco products used</b>                                     |          |          |
| Only factory-made (packet) cigarettes                            | 813      | 46.0     |
| Factory-made and roll-your-own cigarettes                        | 681      | 38.6     |
| Factory-made cigarettes and other products (e.g. cigars, shisha) | 272      | 15.4     |
| <b>Cigarettes per day</b>                                        |          |          |
| 10 or less                                                       | 1272     | 72.0     |
| 11-20                                                            | 433      | 24.5     |
| 21-30                                                            | 46       | 2.6      |
| 31 or more                                                       | 15       | 0.8      |
| <b>Time to first cigarette</b>                                   |          |          |
| Within 5 minutes                                                 | 263      | 14.9     |
| 6 to 30 minutes                                                  | 570      | 32.3     |
| 31 to 60 minutes                                                 | 315      | 17.8     |

| <i>Characteristic</i>                                                                                                                            | <i>N</i> | <i>%</i> |
|--------------------------------------------------------------------------------------------------------------------------------------------------|----------|----------|
| After 60 minutes                                                                                                                                 | 618      | 35.0     |
| <b>Heaviness of Smoking Index (HSI)</b>                                                                                                          |          |          |
| 0 little dependence                                                                                                                              | 601      | 34.0     |
| 1                                                                                                                                                | 257      | 14.6     |
| 2                                                                                                                                                | 418      | 23.7     |
| 3                                                                                                                                                | 293      | 16.6     |
| 4                                                                                                                                                | 156      | 8.8      |
| 5                                                                                                                                                | 28       | 1.6      |
| 6 high dependence                                                                                                                                | 13       | 0.7      |
| <b>Dependence (Tertiles of HSI)</b>                                                                                                              |          |          |
| Low-dependence                                                                                                                                   | 601      | 34.0     |
| Mid-dependence                                                                                                                                   | 675      | 38.2     |
| High-dependence                                                                                                                                  | 490      | 27.7     |
| <b>Made an attempt to quit smoking that lasted at least 24 hours?</b>                                                                            |          |          |
| Yes, within the last six months                                                                                                                  | 788      | 44.6     |
| Yes, more than six months ago                                                                                                                    | 552      | 31.3     |
| No, I have never tried to quit smoking for more than 24 hours                                                                                    | 426      | 24.1     |
| <b>How likely are you to try to quit smoking within the next six months?</b>                                                                     |          |          |
| Not at all                                                                                                                                       | 198      | 11.2     |
| A little                                                                                                                                         | 382      | 21.6     |
| Moderately                                                                                                                                       | 508      | 28.8     |
| Very                                                                                                                                             | 308      | 17.4     |
| Extremely                                                                                                                                        | 272      | 15.4     |
| Don't know                                                                                                                                       | 98       | 5.5      |
| <b>If you decided to quit smoking in the next six months, how sure are you that you would succeed?</b>                                           |          |          |
| Not at all                                                                                                                                       | 147      | 8.3      |
| A little                                                                                                                                         | 346      | 19.6     |
| Moderately                                                                                                                                       | 612      | 34.7     |
| Very                                                                                                                                             | 297      | 16.8     |
| Extremely                                                                                                                                        | 241      | 13.6     |
| Don't know                                                                                                                                       | 123      | 7.0      |
| <b>Quit approach</b>                                                                                                                             |          |          |
| Moderately or less likely to make quit attempt in next six months (unlikely to make a quit attempt in the next six months)                       | 1186     | 67.2     |
| Very or extremely likely to attempt but moderately or less likely to succeed (unlikely to make a successful quit attempt in the next six months) | 304      | 17.2     |
| Very or extremely likely to attempt and very or extremely likely to succeed (likely to make a successful quit attempt in the next six months)    | 276      | 15.6     |

**Table 2:** Perceptions of whether inserts would be read, are a good way to provide information, whether they would help smokers to think about quitting or quit, and support for them

|                                                       | <b>Yes</b> | <b>No</b> | <b>Not sure</b> |
|-------------------------------------------------------|------------|-----------|-----------------|
|                                                       | <b>%</b>   | <b>%</b>  | <b>%</b>        |
| <b>Would they be read</b>                             | 50         | 37        | 13              |
| <b>Would they be read if interested in quitting</b>   | 60         | 25        | 15              |
| <b>Good way to provide information about quitting</b> | 61         | 25        | 14              |

  

|                                                     | <b>Agree</b> | <b>Disagree</b> | <b>Neither / Don't know</b> |
|-----------------------------------------------------|--------------|-----------------|-----------------------------|
|                                                     | <b>%</b>     | <b>%</b>        | <b>%</b>                    |
| <b>Make you think more about quitting</b>           | 53           | 18              | 29                          |
| <b>Might help you if you decided to quit</b>        | 52           | 19              | 29                          |
| <b>Effective way of encouraging smokers to quit</b> | 53           | 17              | 30                          |
| <b>All packs should have inserts</b>                | 55           | 20              | 25                          |

**Table 3a:** Logistic regression models exploring perceptions of inserts by sociodemographic characteristics (gender, age, education, ethnicity)<sup>1,2</sup>

| (n=1766)                                   | Would read insert   | Would read insert if trying to quit | Inserts make you think about quitting | Inserts might help you quit | Inserts a good way of providing information about quitting | Inserts are an effective way of encouraging smokers to quit | All packs should have inserts |
|--------------------------------------------|---------------------|-------------------------------------|---------------------------------------|-----------------------------|------------------------------------------------------------|-------------------------------------------------------------|-------------------------------|
| <b>Gender</b>                              |                     |                                     |                                       |                             |                                                            |                                                             |                               |
| <b>Male</b>                                | 1                   | 1                                   | 1                                     | 1                           | 1                                                          | 1                                                           | 1                             |
| <b>Female</b>                              | 1.24 (1.02 to 1.50) | 1.11 (0.91 to 1.35)                 | 0.98 (0.81 to 1.19)                   | 0.95 (0.79 to 1.15)         | 1.13 (0.93 to 1.37)                                        | 0.88 (0.73 to 1.07)                                         | 1.20 (0.99 to 1.46)           |
| <b>Age</b>                                 |                     |                                     |                                       |                             |                                                            |                                                             |                               |
| <b>16-19</b>                               | 1                   | 1                                   | 1                                     | 1                           | 1                                                          | 1                                                           | 1                             |
| <b>20-24</b>                               | 1.16 (0.87 to 1.54) | 0.88 (0.66 to 1.18)                 | 1.18 (0.89 to 1.56)                   | 1.19 (0.89 to 1.58)         | 0.87 (0.65 to 1.16)                                        | 0.97 (0.73 to 1.28)                                         | 0.96 (0.72 to 1.29)           |
| <b>25-34</b>                               | 1.25 (0.97 to 1.60) | 0.83 (0.65 to 1.07)                 | 0.99 (0.78 to 1.26)                   | 1.18 (0.92 to 1.50)         | 0.76 (0.60 to 0.98)                                        | 0.88 (0.69 to 1.12)                                         | 0.84 (0.65 to 1.07)           |
| <b>Education</b>                           |                     |                                     |                                       |                             |                                                            |                                                             |                               |
| <b>GCSEs (or equivalent) or none</b>       | 1                   | 1                                   | 1                                     | 1                           | 1                                                          | 1                                                           | 1                             |
| <b>More than GCSEs (or equivalent)</b>     | 1.25 (0.99 to 1.58) | 1.12 (0.89 to 1.42)                 | 1.22 (0.97 to 1.54)                   | 1.21 (0.97 to 1.52)         | 1.12 (0.89 to 1.40)                                        | 1.19 (0.95 to 1.50)                                         | 1.10 (0.87 to 1.40)           |
| <b>Ethnicity</b>                           |                     |                                     |                                       |                             |                                                            |                                                             |                               |
| <b>White British</b>                       |                     | 1                                   | 1                                     |                             |                                                            |                                                             | 1                             |
| <b>White but not British</b>               |                     | 0.70 (0.50 to 0.98)                 | 0.58 (0.41 to 0.81)                   |                             |                                                            |                                                             | 0.62 (0.44 to 0.87)           |
| <b>Black (inc mixed black &amp; white)</b> |                     | 0.92 (0.57 to 1.49)                 | 0.61 (0.38 to 0.98)                   |                             |                                                            |                                                             | 0.99 (0.62 to 1.59)           |
| <b>Asian (inc mixed Asian &amp; white)</b> |                     | 0.67 (0.49 to 0.92)                 | 1.19 (0.87 to 1.63)                   |                             |                                                            |                                                             | 0.70 (0.51 to 0.96)           |
| <b>other or not declared</b>               |                     | 0.84 (0.50 to 1.42)                 | 1.06 (0.64 to 1.78)                   |                             |                                                            |                                                             | 1.08 (0.64 to 1.81)           |

<sup>1</sup>Note smoking related characteristics (described in table 3b) were also entered into each model

<sup>2</sup>Blank cells indicate no significant relationship in bivariate analysis

1  
2  
3  
4  
5  
6  
7  
8  
9  
10  
11  
12  
13  
14  
15  
16  
17  
18  
19  
20  
21  
22  
23  
24  
25  
26  
27  
28  
29  
30  
31  
32  
33  
34  
35  
36  
37  
38  
39  
40  
41  
42  
43  
44  
45  
46  
47

**Table 3b:** Logistic regression models exploring perceptions of inserts by smoking related characteristics (dependence, tobacco products smoked, quit attempts, self-efficacy to quit)<sup>1,2</sup>

| (n=1766)                                         | Would read insert   | Would read insert if trying to quit | Inserts make you think about quitting | Inserts might help you quit | Inserts a good way of providing information about quitting | Inserts are an effective way of encouraging smokers to quit | All packs should have inserts |
|--------------------------------------------------|---------------------|-------------------------------------|---------------------------------------|-----------------------------|------------------------------------------------------------|-------------------------------------------------------------|-------------------------------|
| <b>Dependence (tertiles of HSI)</b>              |                     |                                     |                                       |                             |                                                            |                                                             |                               |
| Lower dependence                                 | 1                   |                                     |                                       |                             |                                                            |                                                             | 1                             |
| Mid dependence                                   | 1.39 (1.11 to 1.76) |                                     |                                       |                             |                                                            |                                                             | 1.02 (0.80 to 1.29)           |
| Higher dependence                                | 1.22 (0.94 to 1.59) |                                     |                                       |                             |                                                            |                                                             | 0.86 (0.66 to 1.12)           |
| <b>Tobacco products smoked</b>                   |                     |                                     |                                       |                             |                                                            |                                                             |                               |
| Only factory-made                                | 1                   | 1                                   | 1                                     | 1                           |                                                            | 1                                                           |                               |
| Factory-made and roll-your-own                   | 1.35 (1.09 to 1.66) | 1.61 (1.30 to 2.00)                 | 1.31 (1.06 to 1.62)                   | 1.31 (1.06 to 1.61)         |                                                            | 1.27 (1.03 to 1.56)                                         |                               |
| Factory-made cigarettes and other                | 1.20 (0.90 to 1.59) | 1.39 (1.04 to 1.86)                 | 1.22 (0.92 to 1.63)                   | 1.34 (1.01 to 1.78)         |                                                            | 1.20 (0.91 to 1.60)                                         |                               |
| <b>Quit attempt lasting at least 24 hours</b>    |                     |                                     |                                       |                             |                                                            |                                                             |                               |
| No                                               | 1                   | 1                                   | 1                                     | 1                           | 1                                                          | 1                                                           | 1                             |
| Yes, more than six months ago                    | 1.30 (1.00 to 1.69) | 1.12 (0.86 to 1.45)                 | 1.20 (0.93 to 1.56)                   | 1.05 (0.81 to 1.36)         | 1.16 (0.90 to 1.50)                                        | 1.07 (0.82 to 1.38)                                         | 0.78 (0.60 to 1.01)           |
| Yes within the last six months                   | 1.67 (1.29 to 2.15) | 1.51 (1.17 to 1.94)                 | 1.46 (1.14 to 1.88)                   | 1.35 (1.05 to 1.73)         | 1.54 (1.20 to 1.98)                                        | 1.33 (1.04 to 1.71)                                         | 1.06 (0.82 to 1.37)           |
| <b>Efficacy of quit attempt in next 6 months</b> |                     |                                     |                                       |                             |                                                            |                                                             |                               |
| Likely to quit                                   | 1                   | 1                                   | 1                                     | 1                           | 1                                                          | 1                                                           | 1                             |
| Likely to make unsuccessful attempt              | 1.01 (0.72 to 1.40) | 1.43 (1.00 to 2.06)                 | 0.97 (0.69 to 1.37)                   | 0.92 (0.65 to 1.29)         | 1.46 (1.02 to 2.08)                                        | 1.10 (0.78 to 1.55)                                         | 1.43 (1.00 to 2.04)           |
| Unlikely to make attempt                         | 0.58 (0.44 to 0.75) | 0.74 (0.55 to 0.99)                 | 0.59 (0.45 to 0.78)                   | 0.51 (0.38 to 0.67)         | 0.76 (0.57 to 1.01)                                        | 0.55 (0.41 to 0.73)                                         | 0.56 (0.42 to 0.74)           |

<sup>1</sup>Note sociodemographic characteristics (described in table 3a) were also entered into each model

<sup>2</sup>Blank cells indicate no significant relationship in bivariate analysis

**Table 4:** Bar charts showing a combination of main effects and interactions between cigarette type and socioeconomic status on odds ratios for undesirability in multivariable models

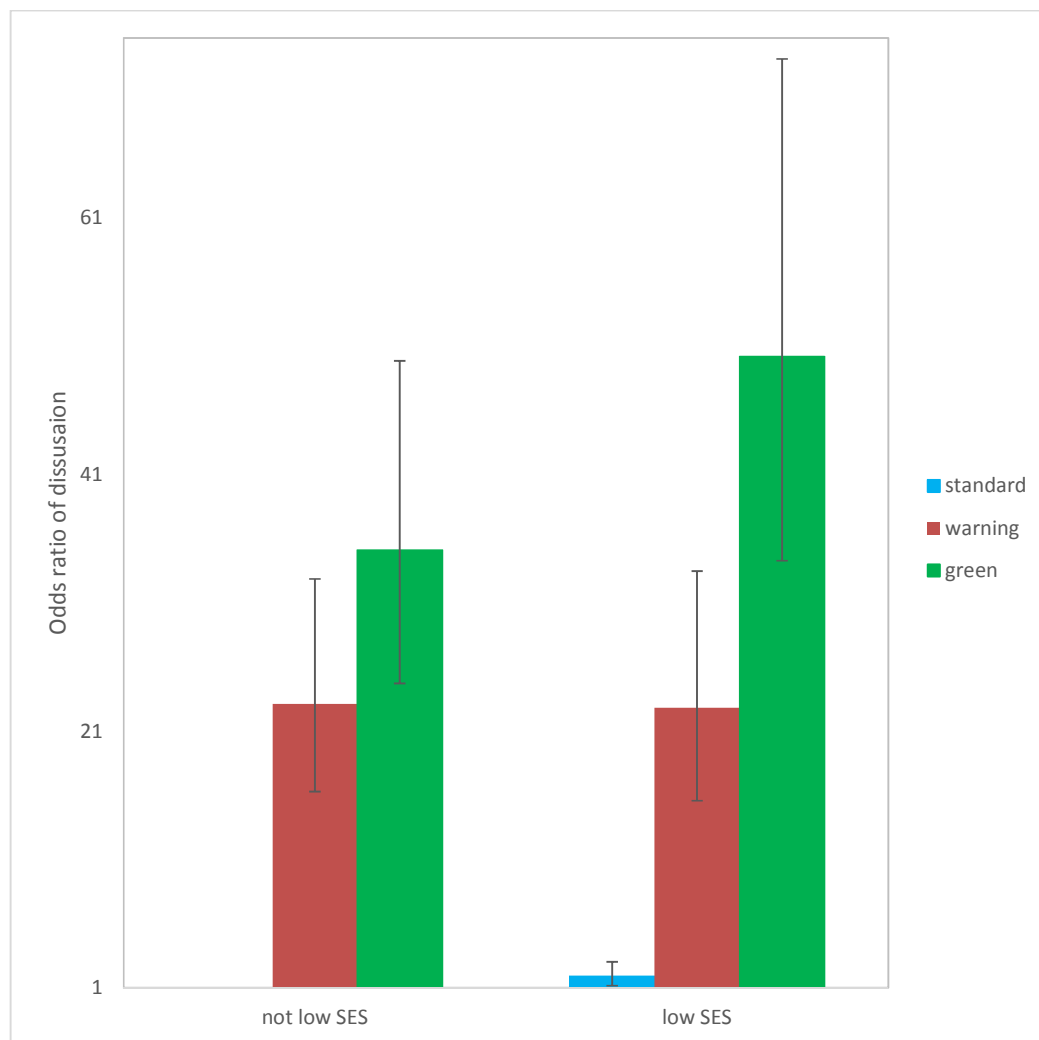

<sup>1</sup> For the standard cigarette, participants categorised as 'not low SES' is the reference group, with an odds ratio of 1, thus they are not displayed



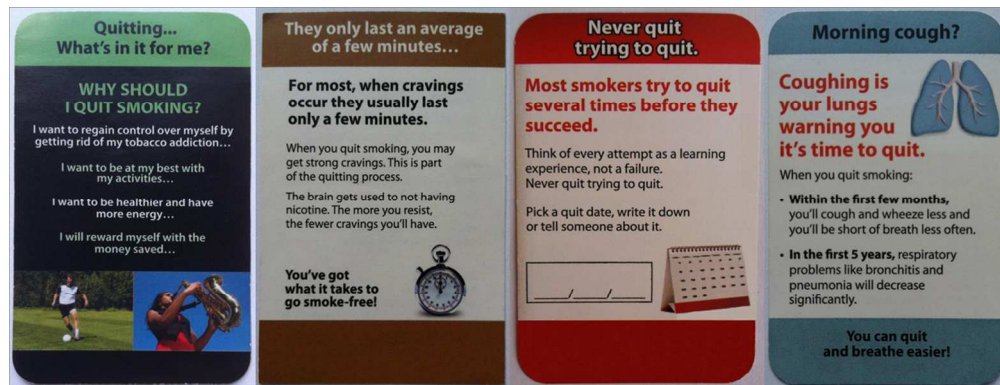

Figure 1: Pack inserts highlighting benefits of quitting or providing tips on how to do so

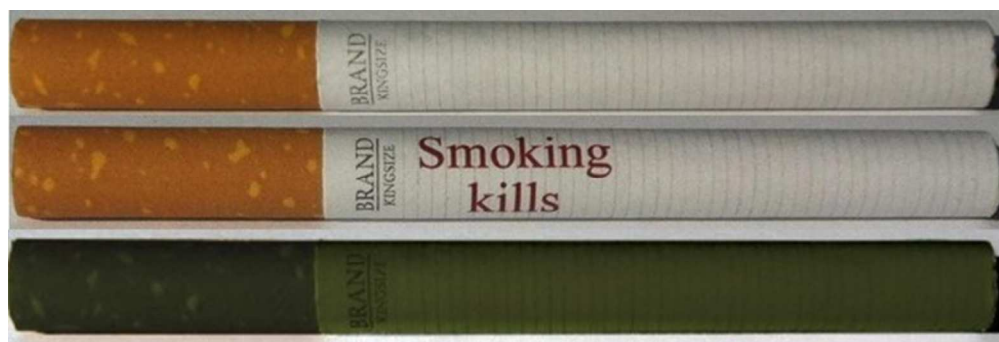

Figure 2: Standard cigarette, warning cigarette and green cigarette

105x35mm (150 x 150 DPI)

peer review only

**STROBE 2007 (v4) checklist of items to be included in reports of observational studies in epidemiology\***  
**Checklist for cohort, case-control, and cross-sectional studies (combined)**

| Section/Topic            | Item # | Recommendation                                                                                                                                                                                               | Reported on page # |
|--------------------------|--------|--------------------------------------------------------------------------------------------------------------------------------------------------------------------------------------------------------------|--------------------|
| Title and abstract       | 1      | (a) Indicate the study's design with a commonly used term in the title or the abstract                                                                                                                       | 2                  |
|                          |        | (b) Provide in the abstract an informative and balanced summary of what was done and what was found                                                                                                          | 2-3                |
| <b>Introduction</b>      |        |                                                                                                                                                                                                              |                    |
| Background/rationale     | 2      | Explain the scientific background and rationale for the investigation being reported                                                                                                                         | 4-5                |
| Objectives               | 3      | State specific objectives, including any pre-specified hypotheses                                                                                                                                            | 6                  |
| <b>Methods</b>           |        |                                                                                                                                                                                                              |                    |
| Study design             | 4      | Present key elements of study design early in the paper                                                                                                                                                      | 6                  |
| Setting                  | 5      | Describe the setting, locations, and relevant dates, including periods of recruitment, exposure, follow-up, and data collection                                                                              | 6                  |
| Participants             | 6      | <i>Cross-sectional study</i> —Give the eligibility criteria, and the sources and methods of selection of participants                                                                                        | 6                  |
| Variables                | 7      | Clearly define all outcomes, exposures, predictors, potential confounders, and effect modifiers. Give diagnostic criteria, if applicable                                                                     | 7-10               |
| Data sources/measurement | 8*     | For each variable of interest, give sources of data and details of methods of assessment (measurement). Describe comparability of assessment methods if there is more than one group                         | 10-12              |
| Bias                     | 9      | Describe any efforts to address potential sources of bias                                                                                                                                                    | 6                  |
| Study size               | 10     | Explain how the study size was arrived at                                                                                                                                                                    | 6                  |
| Quantitative variables   | 11     | Explain how quantitative variables were handled in the analyses. If applicable, describe which groupings were chosen and why                                                                                 | 10-12              |
| Statistical methods      | 12     | (a) Describe all statistical methods, including those used to control for confounding                                                                                                                        | 10-12              |
|                          |        | (b) Describe any methods used to examine subgroups and interactions                                                                                                                                          | 10-12              |
|                          |        | (c) Explain how missing data were addressed                                                                                                                                                                  | 7                  |
|                          |        | (d) <i>Cross-sectional study</i> —If applicable, describe analytical methods taking account of sampling strategy                                                                                             | NA                 |
|                          |        | (e) Describe any sensitivity analyses                                                                                                                                                                        | NA                 |
| <b>Results</b>           |        |                                                                                                                                                                                                              |                    |
| Participants             | 13*    | (a) Report numbers of individuals at each stage of study—eg numbers potentially eligible, examined for eligibility, confirmed eligible, included in the study, completing follow-up, and analysed            | 6, 28-29           |
|                          |        | (b) Give reasons for non-participation at each stage                                                                                                                                                         | 6                  |
|                          |        | (c) Consider use of a flow diagram                                                                                                                                                                           | NA                 |
| Descriptive data         | 14*    | (a) Give characteristics of study participants (eg demographic, clinical, social) and information on exposures and potential confounders                                                                     | 25-26              |
|                          |        | (b) Indicate number of participants with missing data for each variable of interest                                                                                                                          | NA                 |
| Outcome data             | 15*    | <i>Cross-sectional study</i> —Report numbers of outcome events or summary measures                                                                                                                           | 12-16              |
| Main results             | 16     | (a) Give unadjusted estimates and, if applicable, confounder-adjusted estimates and their precision (eg, 95% confidence interval). Make clear which confounders were adjusted for and why they were included | 12-16              |
|                          |        | (b) Report category boundaries when continuous variables were                                                                                                                                                | 28-29              |

|                          |    |                                                                                                                                                                            |       |
|--------------------------|----|----------------------------------------------------------------------------------------------------------------------------------------------------------------------------|-------|
|                          |    | categorized                                                                                                                                                                |       |
|                          |    | (c) If relevant, consider translating estimates of relative risk into absolute risk for a meaningful time period                                                           | NA    |
| Other analyses           | 17 | Report other analyses done—eg analyses of subgroups and interactions, and sensitivity analyses                                                                             | 10-12 |
| <b>Discussion</b>        |    |                                                                                                                                                                            |       |
| Key results              | 18 | Summarise key results with reference to study objectives                                                                                                                   | 16-18 |
| Limitations              | 19 | Discuss limitations of the study, taking into account sources of potential bias or imprecision. Discuss both direction and magnitude of any potential bias                 | 18-19 |
| Interpretation           | 20 | Give a cautious overall interpretation of results considering objectives, limitations, multiplicity of analyses, results from similar studies, and other relevant evidence | 16-18 |
| Generalisability         | 21 | Discuss the generalisability (external validity) of the study results                                                                                                      | 16-19 |
| <b>Other information</b> |    |                                                                                                                                                                            |       |
| Funding                  | 22 | Give the source of funding and the role of the funders for the present study and, if applicable, for the original study on which the present article is based              | 19    |

\*Give information separately for cases and controls in case-control studies and, if applicable, for exposed and unexposed groups in cohort and cross-sectional studies.

**Note:** An Explanation and Elaboration article discusses each checklist item and gives methodological background and published examples of transparent reporting. The STROBE checklist is best used in conjunction with this article (freely available on the Web sites of PLoS Medicine at <http://www.plosmedicine.org/>, Annals of Internal Medicine at <http://www.annals.org/>, and Epidemiology at <http://www.epidem.com/>). Information on the STROBE Initiative is available at [www.strobe-statement.org](http://www.strobe-statement.org).

# BMJ Open

## Perceptions of cigarette pack inserts promoting cessation and dissuasive cigarettes among young adult smokers in the United Kingdom: A cross-sectional online survey

|                                 |                                                                                                                                                                                                      |
|---------------------------------|------------------------------------------------------------------------------------------------------------------------------------------------------------------------------------------------------|
| Journal:                        | <i>BMJ Open</i>                                                                                                                                                                                      |
| Manuscript ID                   | bmjopen-2017-019662.R1                                                                                                                                                                               |
| Article Type:                   | Research                                                                                                                                                                                             |
| Date Submitted by the Author:   | 23-Mar-2018                                                                                                                                                                                          |
| Complete List of Authors:       | Moodie, Crawford; University of Stirling, Institute for Social Marketing<br>Hiscock, Rosemary; University of Bath<br>Thrasher, Jim; University of South Carolina<br>Reid, Garth; NHS Health Scotland |
| <b>Primary Subject Heading</b>: | Smoking and tobacco                                                                                                                                                                                  |
| Secondary Subject Heading:      | Public health                                                                                                                                                                                        |
| Keywords:                       | Smoking, Packaging, Inserts, Cigarettes                                                                                                                                                              |
|                                 |                                                                                                                                                                                                      |

SCHOLARONE™  
Manuscripts

1  
2  
3 **Title:** Perceptions of cigarette pack inserts promoting cessation and dissuasive cigarettes  
4  
5 among young adult smokers in the United Kingdom: A cross-sectional online survey  
6  
7

8  
9 **Authors:** Crawford Moodie<sup>1</sup>, Rosemary Hiscock<sup>2</sup>, Jim Thrasher<sup>3</sup>, Garth Reid<sup>4</sup>  
10  
11

12  
13 **Affiliations:**  
14

15  
16 <sup>1</sup> Institute for Social Marketing, Faculty of Health Sciences and Sport, University of Stirling,  
17 Stirlingshire, Scotland  
18

19  
20 <sup>2</sup> Department for Health, University of Bath, England  
21

22 <sup>3</sup> Health Promotion, Education, and Behavior, Arnold School of Public Health, University of  
23 South Carolina, Columbia, United States  
24

25  
26 <sup>4</sup> Policy Evaluation, NHS Health Scotland, Edinburgh, Scotland  
27  
28

29  
30  
31 **Corresponding author:** Crawford Moodie, Institute for Social Marketing, Department of  
32 Health Sciences and Sport, University of Stirling, Stirlingshire, Scotland FK9 4LA. Tel: +44  
33 (0)1786 466456. Email: [c.s.moodie@stir.ac.uk](mailto:c.s.moodie@stir.ac.uk)  
34  
35  
36  
37

38  
39 **Keywords:** Smoking, Packaging, Inserts, Cigarettes  
40  
41

42  
43  
44 **Word count:** 4899  
45  
46  
47  
48  
49  
50  
51  
52  
53  
54  
55  
56  
57  
58  
59  
60

1  
2  
3 **Perceptions of cigarette pack inserts promoting cessation and dissuasive cigarettes**  
4  
5 **among young adult smokers: A cross-sectional online survey**  
6  
7

8  
9 **ABSTRACT**  
10

11 **Objectives:** To explore young adult smokers' perceptions of cigarette pack inserts promoting  
12 cessation and cigarettes designed to be dissuasive.  
13

14  
15 **Design:** Cross-sectional online survey.  
16

17  
18 **Setting:** United Kingdom.  
19

20 **Participants:** The final sample was 1766 young adult smokers, with 50.3% male and 71.6%  
21 white British. To meet the inclusion criteria participants had to be 16-34 years old and smoke  
22 factory-made cigarettes.  
23  
24

25  
26 **Primary and secondary outcome measures:** Salience of inserts, perceptions of inserts as  
27 information provision, perceptions of inserts on quitting, support for inserts, and perceived  
28 appeal, harm and trial of three cigarettes (a standard cigarette, a standard cigarette displaying  
29 the warning 'Smoking kills', and a green cigarette).  
30  
31

32  
33 **Results:** Half the sample indicated that they would read inserts with three-fifths indicating  
34 that they be a good way to provide information about quitting (61%). Just over half indicated  
35 that inserts would make them think more about quitting (53%), help if they decided to quit  
36 (52%), are an effective way of encouraging smokers to quit (53%), and supported having  
37 them in all packs (55%). Participants who smoked factory-made cigarettes and other tobacco  
38 products (compared to exclusive factory-made cigarette smokers), had made a quit attempt  
39 within the last six months (compared to those that had never made a quit attempt), or were  
40 likely to make a successful quit attempt in the next six months (compared to those unlikely to  
41 make a quit attempt in the next six months), were more likely to indicate that inserts could  
42 assist with cessation. Multivariable logistic regression modelling suggested that compared  
43  
44  
45  
46  
47  
48  
49  
50  
51  
52  
53  
54  
55  
56  
57  
58  
59  
60

1  
2  
3 with the standard cigarette, the cigarette with warning (adjusted Odds Ratio=17.71; 95%CI  
4 13.75-22.80) and green cigarette (adjusted Odds Ratio=30.88; 95%CI 23.98-39.76) were  
5  
6  
7 much less desirable (less appealing, more harmful, less likely to be tried).  
8

9 **Conclusions:** Inserts and dissuasive cigarettes offer policy makers additional ways of using  
10 the pack to reduce smoking.  
11  
12

### 13 14 15 **Strengths and limitations of this study**

- 16  
17  
18     ▪ The main strength of this study is that it allows an insight into how young adult  
19 smokers perceive two innovative tobacco control measures (pack inserts promoting  
20 cessation and dissuasive cigarettes).  
21  
22
- 23  
24     ▪ The main limitation of the study is that it does not provide any insight into actual  
25 smoking behaviour.  
26  
27
- 28  
29     ▪ Additional limitations include the novelty of the stimuli and forced exposure to this,  
30 and the use of self-selection.  
31  
32  
33  
34  
35  
36  
37  
38  
39  
40  
41  
42  
43  
44  
45  
46  
47  
48  
49  
50  
51  
52  
53  
54  
55  
56  
57  
58  
59  
60



## INTRODUCTION

While packaging remains a key marketing driver for tobacco companies, more than 100 countries now require pictorial health warnings on cigarette packs,<sup>1</sup> which can limit pack appeal.<sup>2</sup> Some countries have gone even further by implementing plain (or standardised) packaging, which severely reduces the promotional power of the pack. The United Kingdom (UK) became the third country to fully implement standardised packaging in May 2017, following Australia in December 2012 and France in January 2017. In the UK all cigarette packs must be drab brown with pictorial warnings on 65% of the front and back of packs and additional health messages on 50% of the sides of the pack. Although these changes have reduced the ability of tobacco companies to use the pack to create favourable perceptions of the brand and of smoking, there is clearly more scope for using the packaging to dissuade consumers. Regulators and academics have typically focused on the exterior of the cigarette pack, with little consideration of how the pack interior, for instance pack inserts or cigarettes, which have long been used by tobacco companies to promote their brands, could potentially be used to encourage smokers to think about their smoking behaviour. This is the focus of our study.

Tobacco companies have used the inside of the cigarette pack to communicate with consumers since the late 19th century, via cigarette cards, coupons and promotional inserts. Only in Canada are they required, by law, to include pack inserts with health messaging. Sixteen text-only inserts were required in packs between 2000 and 2012, with nine encouraging cessation and seven providing health risk information.<sup>3</sup> These were replaced with eight new inserts, with coloured graphics and positively framed messages about the benefits of quitting or tips on how to do so, in 2012. Few studies have explored perceptions of pack inserts,<sup>4-8</sup> with only two assessing smokers' perceptions of, and responses to, the inserts used in Canada.<sup>9-11</sup> In focus group research in Scotland,<sup>9</sup> with smokers aged 16 and

1  
2  
3 over who were shown seven of the inserts used in Canada, the general view was that they  
4 would capture attention and be read due to their novelty and visibility when opening the pack.  
5  
6 Inserts were also thought to have a long lasting impact as they would be removed from the  
7 pack and remain visible within the household or elsewhere, or as litter.<sup>9</sup> The positive  
8  
9 messaging was liked and thought to increase message engagement. The inserts were often  
10  
11 preferred to the on-pack warnings, although both were deemed necessary. Some participants  
12  
13 suggested that inserts could encourage them to stop smoking, and they were generally  
14  
15 considered to have the potential to alter the behaviour of younger people, would-be smokers  
16  
17 and those wanting to quit.<sup>9</sup> In Canada, a longitudinal online survey with smokers aged 18 and  
18  
19 over found that between 26% and 31% at each wave reported having read pack inserts at least  
20  
21 once in the prior month; those intending to quit or having recently tried to do so were  
22  
23 significantly more likely to have read them.<sup>10</sup> In addition, while reading warnings on the pack  
24  
25 exterior decreased over time, reading pack inserts increased over time, with more frequent  
26  
27 reading independently associated with self-efficacy to quit, quit attempts, and sustained  
28  
29 quitting at follow-up.<sup>11</sup>  
30  
31  
32  
33  
34

35 The cigarette itself is also an important communications tool,<sup>12,13</sup> which has long been  
36  
37 used by tobacco companies as a marketing device but has yet to be used by regulators to deter  
38  
39 smoking. As cigarettes are primarily responsible for tobacco related mortality and morbidity  
40  
41 and predicted to continue to dominate the global market for some time yet,<sup>14</sup> research  
42  
43 exploring the potential impact of standardising the appearance of cigarettes to make them less  
44  
45 desirable is long overdue. Some recent research has examined consumer perceptions of  
46  
47 cigarettes that have been designed to be 'dissuasive', including unattractively coloured  
48  
49 cigarettes,<sup>15,16</sup> cigarettes with the warning 'Smoking kills' on the cigarette paper,<sup>17,18</sup> and  
50  
51 cigarettes displaying the 'minutes of life lost due to smoking' on the cigarette paper.<sup>19</sup> In each  
52  
53 of these studies the dissuasive cigarettes were generally viewed more negatively than regular  
54  
55  
56  
57  
58  
59  
60

1  
2  
3 cigarettes. For instance, a qualitative study with young women smokers in New Zealand  
4 found that unattractively coloured cigarettes, particularly green or brown coloured cigarettes,  
5 were perceived as more harmful than other cigarettes, with it less likely that they or others  
6 their age would want to use them.<sup>15</sup> An in-home survey in the UK with 11-16 year olds, who  
7 were shown an image of a cigarette stick displaying ‘Smoking kills’, found that 53%  
8 indicated that this would make people want to give up smoking, 71% indicated that it would  
9 put people off starting to smoke, and 85% supported having a warning on all cigarettes.<sup>18</sup>  
10  
11  
12  
13  
14  
15  
16  
17

18 In this study our objective was to explore, for the first time, young adult smokers’  
19 perceptions of pack inserts and dissuasive cigarettes (a cigarette displaying the warning  
20 ‘Smoking kills’ and a green coloured cigarette).  
21  
22  
23  
24  
25

## 26 **METHODS**

### 27 **Design and sample**

28  
29  
30  
31 An online survey was conducted in January-February 2016 with smokers aged 16-34 years  
32 old in the UK; an online survey is a suitable approach given that 99% of this age group in the  
33 UK are recent internet users.<sup>20</sup> The sample (n=1970) was recruited by online market research  
34 company ‘Research Now’ from their panel of over 400,000 people ([www.researchnow.com](http://www.researchnow.com)).  
35 After Research Now excluded those who had completed the survey in less than the minimum  
36 completion time (n=193), which they had set prior to data collection commencing, and those  
37 providing responses to open-ended questions that indicated that they had not taken the survey  
38 seriously (n=11), the final sample was 1766 (89.6% of completed surveys). The final sample  
39 was 50.3% male, with 53.9% aged 25-34 years and 71.6% white British. Most participants  
40 smoked 10 or less cigarettes per day, with 46.0% exclusive factory-made cigarette smokers  
41 (see Table 1 for sample and smoking-related characteristics).  
42  
43  
44  
45  
46  
47  
48  
49  
50  
51  
52  
53  
54  
55  
56  
57  
58  
59  
60

1  
2  
3  
4  
5 Table 1 here  
6  
7  
8

9 **Procedure**

10  
11 An email invite was sent by Research Now to their online panel in the UK. Research Now is  
12 an established online market research company in the UK and elsewhere,<sup>21</sup> with their panels  
13 recruited from a wide range of sources, such as internet sites, advertising and partnerships  
14 with other websites. Research Now, like other online panels, has details of their members'  
15 demographics and other characteristics that are used to profile target samples. Response rate  
16 details are not available when using this sampling methodology however as recording  
17 contact, participation and refusal rates is not practical.<sup>22</sup> For those that responded to the email  
18 invite, they answered screening questions about their age, smoking status and types of  
19 tobacco products used, with those that did not meet the inclusion criteria (factory-made  
20 cigarette smokers aged 16-34 years) excluded.  
21  
22  
23  
24  
25  
26  
27  
28  
29  
30  
31  
32

33 Those eligible for inclusion were presented with an information page explaining the  
34 study aim (to explore what young adult smokers thought about cigarettes and pack inserts),  
35 and relevant ethical information (their right to withdraw at any time, assurances of  
36 confidentiality and anonymity, and contact details if they had any concerns or would like to  
37 request a copy of the published findings). They were then presented with a consent page, with  
38 consent required for participation. Survey questions were presented in the same order for all  
39 participants, except the questions exploring perceptions of the three cigarettes (standard  
40 cigarette, warning cigarette, green cigarette), where the ordering was randomised; the  
41 ordering of the presentation of the three cigarettes (shown in Figure 1) was also randomised.  
42 There was no missing data as participants could only proceed to the next question if they had  
43 provided an answer to the previous question.  
44  
45  
46  
47  
48  
49  
50  
51  
52  
53  
54  
55  
56  
57  
58  
59  
60

1  
2  
3  
4  
5 Figure 1 here  
6  
7  
8

9 Prior to the questions on inserts, participants were shown an image of a cigarette pack with an  
10 insert shown in the front of the pack – as they typically appear in packs – alongside the text  
11 ‘We have some questions on pack inserts, which can sometimes be found inside packs (see  
12 image for example)’. For each question about inserts, participants were shown the question  
13 and an image of one insert. Four different inserts were used in total, as shown in Figure 2,  
14 with these chosen from the eight used in Canada as they were considered most relevant to our  
15 sample. The words ‘Health Canada’ were removed from the bottom of each insert to make  
16 them more relevant for participants in the UK. The median time for survey completion was 9  
17 minutes 28 seconds. Participants received a nominal incentive (50 pence) for participation, as  
18 is common for online panels. The study received ethical approval from the School of Health  
19 Sciences Ethics Committee at the University of Stirling.  
20  
21  
22  
23  
24  
25  
26  
27  
28  
29  
30  
31  
32  
33  
34

35 Figure 2 here  
36  
37  
38

### 39 **Patient and public involvement**

40 There was no patient or public involvement in the development, design or conduct of this  
41 study.  
42  
43  
44  
45  
46  
47

### 48 **Measures**

49  
50  
51  
52 *Inserts: Salience and information provision*  
53  
54  
55  
56  
57

1  
2  
3 Participants were asked ‘If this type of insert was in your cigarette pack, do you think that  
4 you would read it?’ and ‘If this type of insert was in your cigarette pack, do you think that  
5 you would read it if you were interested in quitting?’ They were also asked ‘Do you think  
6 that inserts would be a good way to provide information to smokers about quitting?’<sup>5</sup>  
7  
8  
9  
10  
11 Response options for each were ‘Yes’, ‘No’ and ‘Not sure’.  
12  
13

### 14 15 16 *Inserts: Cessation*

17  
18 Three questions assessed to what extent participants agreed or disagreed that inserts would  
19 make them think about quitting, and help them quit: ‘Do you agree or disagree that having  
20 these types of inserts in every cigarette pack would make you think more about quitting?’,  
21 ‘Do you agree or disagree that having these types of inserts in every cigarette pack might help  
22 you if you decided to quit?’, and ‘Do you agree or disagree that having these types of inserts  
23 inside every cigarette pack would be an effective way of helping smokers who want to quit?’<sup>6</sup>  
24  
25 Response options for each were ‘Strongly disagree’, ‘Disagree’, ‘Neither agree nor disagree’,  
26 ‘Agree’, ‘Strongly agree’ and ‘Don’t know’.  
27  
28  
29  
30  
31  
32  
33  
34  
35  
36

### 37 *Inserts: Support*

38  
39 A five-point semantic scale assessed support, with anchors ‘All cigarette packs should have  
40 inserts like this in them-No cigarette packs should have inserts like this in them’.  
41  
42  
43  
44  
45

### 46 *Cigarette design: Appeal, harm and trial*

47  
48 Seven-point semantic scales assessed appeal, harm and likely trial. Appeal was assessed via  
49 four scales, with anchors ‘Attractive-Unattractive’, ‘Stylish-Not stylish’, ‘Not nice to be seen  
50 with-Nice to be seen with’ and ‘Not appealing to people my age-Appealing to people my  
51 age’. Harm was assessed via two scales, with anchors ‘Looks harmful to health-Does not look  
52  
53  
54  
55  
56  
57  
58  
59  
60

1  
2  
3 harmful to health' and 'Makes me think about the dangers of smoking-Does not make me  
4 think about the dangers of smoking'. Likely trial was assessed via two scales, 'If a friend  
5 offered you each of these cigarettes, how likely would you be to try them?' and 'If someone  
6 your age who had never smoked before was going to try a cigarette, how likely do you think  
7 they would be to try each of these cigarettes?' Both scales assessing trial ranged from 'Not at  
8 all likely' to 'Very likely'.

### 15 *Sociodemographic characteristics*

16 Age, gender, ethnicity, educational attainment and economic status (based on chief income  
17 earner) were obtained. A count procedure was used to create a variable for low  
18 socioeconomic status (SES): low education (General Certificate of Secondary Education:  
19 GCSE or below) and/or low economic status (routine or manual occupation, long-term  
20 unemployed or long-term sick or disabled).

### 30 *Smoking behaviour*

31 Smoking status was assessed with 'Which of these best describes you?' with response  
32 options: 'I have never smoked', 'I used to smoke, but don't now', 'I smoke, but not every  
33 day', and 'I smoke every day'. Type of products used was assessed with 'What type(s) of  
34 tobacco products do you smoke?' with response options: 'Only factory-made (packet)  
35 cigarettes', 'Factory-made and roll-your-own cigarettes', 'Factory-made cigarettes and other  
36 tobacco products (e.g. cigars, shisha, etc)', 'Only roll-your-own cigarettes' and 'Only other  
37 tobacco products (e.g. cigars, shisha, etc)'. The Heaviness of Smoking Index (HSI)<sup>23</sup> was  
38 used as a measure of dependence, based on daily consumption and time to first cigarette.  
39  
40  
41  
42  
43  
44  
45  
46  
47  
48  
49  
50

### 51 *Quitting and self-efficacy*

1  
2  
3 Participants were asked 'Have you ever made an attempt to quit smoking that lasted at least  
4 24 hours?'<sup>24</sup> (Yes within the last six months, Yes more than six months ago, I have never  
5 tried to quit for more than 24 hours). They were also asked 'How likely are you to try to quit  
6 smoking within the next six months?'<sup>25</sup> (Not at all, A little, Moderately, Very, Extremely,  
7 Don't know), with those responding 'Not at all', 'A little', 'Moderately' or 'Don't know'  
8 classified as 'Unlikely to make a quit attempt in the next six months'. To measure quitting  
9 self-efficacy, participants were asked 'If you decided to quit smoking in the next six months,  
10 how sure are you that you would succeed?'<sup>26</sup> (Not at all, A little, Moderately, Very,  
11 Extremely, Don't know). Those who responded to the likelihood of quitting question with  
12 'Very' or 'Extremely' and to the quitting efficacy question with 'Not at all', 'A little',  
13 'Moderately' or 'Don't know' were classified as 'unlikely to make a successful quit attempt  
14 in the next six months'. Those who responded 'Very' or 'Extremely' to both questions were  
15 classified as 'likely to make a successful quit attempt in the next six months'.  
16  
17  
18  
19  
20  
21  
22  
23  
24  
25  
26  
27  
28  
29  
30  
31  
32

### 33 **Analysis**

34  
35 Data was analysed using Microsoft office Excel 2013, SPSS v22 and v23 and MLWin  
36 v2.33.<sup>27</sup> The insert variables were dichotomised into yes/agreement and  
37 no/disagreement/neutral/not sure/don't know. The dichotomised insert variables were the  
38 outcomes of the logistic regression models. The independent variables were gender, age,  
39 education, ethnicity, dependence (tertiles of HSI), tobacco product(s) smoked, previous quit  
40 attempt lasting at least 24 hours, and likely efficacy of a quit attempt in the next six months.  
41 Percentages in agreement were calculated. Age, gender and education (as a measure of SES)  
42 were entered into all models to account for any sampling inadequacies. Other variables were  
43 entered where  $p < 0.10$  in chi square tests. The models were assessed for multicollinearity via  
44 comparison of standard errors<sup>28</sup> and none was found.  
45  
46  
47  
48  
49  
50  
51  
52  
53  
54  
55  
56  
57  
58  
59  
60



1  
2  
3 The cigarette variables were assessed using seven-point semantic scales, with  
4 percentages calculated for those indicating one of the three points nearest the undesirable  
5 anchor (e.g. unattractive, not nice to be seen with, looks harmful to health). Differences  
6 between the three cigarettes were tested using Cochran's Q and pairwise comparisons. A  
7 factor analysis of the eight perception variables, collated for all three cigarettes, was  
8 undertaken, with checks indicating that the data was suitable for factor analysis (Kaiser  
9 Meyer Olkin=0.845, Bartlett's test of sphericity (approx. chi-square 18062.842, df=276,  
10 p<0.001), with no correlations between the variables >0.9). The extraction method used was  
11 Principal Axis Factoring and the criteria for extraction was eigenvalues>1. All eight variables  
12 loaded on a single factor with factor loadings that were >0.5. High factor scores indicated that  
13 a cigarette was desirable and low scores that it was undesirable. Visual inspection and the  
14 Kolmogorov-Smirnov test indicated that the factor was non-normal (because responses for  
15 the dissuasive cigarettes indicated they were undesirable generally) and attempts to normalise  
16 it using normit rankit methods failed. Thus the factor was divided into tertiles and the tertile  
17 indicating undesirable factor scores was compared with the other two tertiles. This was the  
18 outcome variable in regression analysis.  
19  
20  
21  
22  
23  
24  
25  
26  
27  
28  
29  
30  
31  
32  
33  
34  
35  
36

37 Multilevel logistic regression modelling, with second order PQL estimation,<sup>29</sup> was  
38 undertaken with cigarette type (at level one) clustered with individual participants (at level  
39 two). All models included cigarette type as a fixed effect, where the standard cigarette was  
40 compared with the warning cigarette and green cigarette. Other fixed effects at the individual  
41 (participant) level were sociodemographic and smoking-related characteristics. This main  
42 effects model tested which characteristics were associated with perceiving cigarettes as  
43 desirable. In order to understand which characteristics differentiated the desirability of the  
44 three types of cigarettes, interactions between cigarette type and each significant  
45 characteristic were tested. Only one interaction was found, between cigarette type and SES.  
46  
47  
48  
49  
50  
51  
52  
53  
54  
55  
56  
57  
58  
59  
60

1  
2  
3 The interacting variables (cigarette type and SES) were substituted by a cross classified  
4 variable which merged cigarette type and SES. This cross classified variable was split into  
5 six categories: low SES standard cigarette, low SES warning cigarette, low SES green  
6 cigarette, not low SES standard cigarette, not low SES warning cigarette, not low SES green  
7 cigarette. To understand the interaction several models were run with the reference category  
8 of the cross classified variable different each time.<sup>30,31</sup>  
9  
10  
11  
12  
13  
14  
15  
16  
17

## 18 RESULTS

### 21 Perceptions of inserts

22 Half the sample indicated that they would read inserts, with approximately three-fifths  
23 indicating that they would read them if interested in quitting (60%), and that they would be a  
24 good way to provide information about quitting (61%). Just over half strongly agreed/agreed  
25 that inserts may make them think more about quitting (53%), help them if they decided to  
26 quit (52%), that they are an effective way of encouraging smokers to quit (53%), and that all  
27 cigarette packs should have inserts (55%), see Table 2.  
28  
29  
30  
31  
32  
33  
34  
35  
36  
37  
38  
39  
40  
41  
42  
43

44 Table 2 here

### 45 Sociodemographic differences in perceptions of inserts

46 Women were more likely than men to indicate that they would read inserts (aOR=1.24;  
47 95%CI 1.02-1.50), and 25-34 year olds less likely than 16-19 year olds to think that they  
48 were a good way of providing information about quitting (aOR=0.76; 95%CI 0.60-0.98).  
49 Compared with white British participants, white non-British (aOR=0.70; 95%CI 0.50-0.98)  
50 and Asian (aOR=0.67; 95%CI 0.49-0.92) participants were less likely to suggest that they  
51  
52  
53  
54  
55  
56  
57  
58  
59  
60

1  
2  
3 would read inserts if trying to quit, white non-British (aOR=0.58; 95%CI 0.41-0.81) and  
4  
5 Black (aOR=0.61; 95%CI 0.38-0.98) participants were less likely to indicate that inserts  
6  
7 would make them think about quitting, and white non-British (aOR=0.62; 95%CI 0.44-0.87)  
8  
9 and Asian (aOR=0.70; 95%CI 0.51-0.96) participants were less likely to support having  
10  
11 inserts in all packs, see Table 3a.  
12  
13

### 14 15 **Smoking-related differences**

16  
17 Compared to exclusive factory-made cigarette smokers, those who also smoked roll-your-  
18  
19 own cigarettes were more likely to indicate they would read inserts (aOR=1.35; 95%CI 1.09-  
20  
21 1.66), read them if trying to quit (aOR=1.61; 95%CI 1.30-2.00), that they would make them  
22  
23 think about quitting (aOR=1.31; 95%CI 1.06-1.62), help them if they decided to quit  
24  
25 (aOR=1.31; 95%CI 1.06-1.61), and that they would be an effective way of encouraging  
26  
27 smokers to quit (aOR=1.27; 95%CI 1.03-1.56). Compared to exclusive factory-made  
28  
29 cigarette smokers, those who also smoked other tobacco products (e.g. cigars, shisha) were  
30  
31 more likely to indicate they would read inserts if trying to quit (aOR=1.39; 95%CI 1.04-1.86)  
32  
33 and that inserts might help them if they decided to quit (aOR=1.34; 95%CI 1.01-1.78).  
34  
35  
36

37  
38 Participants who had made a quit attempt more than six months ago (aOR=1.30;  
39  
40 95%CI 1.00-1.69), or within the last six months (aOR=1.67; 95%CI 1.29-2.15), were more  
41  
42 likely to indicate that they would read inserts than those who had never made a quit attempt.  
43  
44 Those who had made a quit attempt in the last six months were also more likely than those  
45  
46 who had never made a quit attempt to indicate that inserts were a good way to provide  
47  
48 information about quitting (aOR=1.54; 95%CI 1.20-1.98), that they would read them if trying  
49  
50 to quit (aOR=1.51; 95%CI 1.17-1.94), make them think about quitting (aOR=1.46; 95%CI  
51  
52 1.14-1.88), help them if they decided to quit (aOR=1.35; 95%CI 1.05-1.73), and that they  
53  
54 would be an effective way of encouraging smokers to quit (aOR=1.33; 95%CI 1.04-1.71).  
55  
56  
57  
58  
59  
60

1  
2  
3 Compared to those likely to make a successful quit attempt in the next six months,  
4 those unlikely to make a quit attempt in the next six months were less likely to indicate that  
5 they would read inserts (aOR=0.58; 95%CI 0.44-0.75), read them if trying to quit  
6 (aOR=0.74; 95%CI 0.55-0.99), that they would make them think about quitting (aOR 0.59  
7 (0.45 to 0.78), help them if they decided to quit (aOR=0.51; 95%CI 0.38-0.67), that they  
8 would be effective for smokers if they decided to quit (aOR=0.55; 95%CI 0.41-0.73), or  
9 support them (aOR=0.56; 95%CI 0.42-0.74). Compared to those likely to make a successful  
10 quit attempt in the next six months, those unlikely to make a successful quit attempt in the  
11 next six months were more likely to read inserts if trying to quit (aOR=1.43; 95%CI 1.00-  
12 2.06), thought that they were a good way to provide information to smokers about quitting  
13 (aOR=1.46; 95%CI 1.02-2.08), and support them (aOR=1.43; 95%CI 1.00-2.04), see Table  
14 3b.

15  
16  
17  
18  
19  
20  
21  
22  
23  
24  
25  
26  
27  
28  
29  
30  
31 Table 3 here  
32  
33  
34

### 35 **Perceptions of cigarette design**

36  
37 With respect to harm, participants were less likely to think that the standard cigarette (SC)  
38 looked harmful than the warning cigarette (WC) or green cigarette (GC) ( $p<0.001$ ), and less  
39 likely to think that the SC made them think more about the dangers of smoking than the WC  
40 or GC ( $p<0.001$ ). Participants were also less likely to indicate that the GC would make them  
41 think of the dangers of smoking than the WC ( $p=0.01$ ). In terms of appeal, participants were  
42 more likely to consider the SC attractive, and stylish, than the WC or GC (both  $p<0.001$ ). The  
43 SC was also considered to be nicer to be seen with, and more appealing to people their age,  
44 than the WC or GC (both  $p<0.001$ ). In terms of trial, 79.4% indicated that they would try a  
45 SC if offered by a friend (35.7% WC, 21.5% GC), and 70.1% indicated that a never smoker  
46  
47  
48  
49  
50  
51  
52  
53  
54  
55  
56  
57  
58  
59  
60

1  
2  
3 their age would be most likely to try a SC (21.1% WC, 16.5% GC) (both  $p < 0.001$ ), see Table  
4  
5 4.

6  
7  
8  
9 Table 4 here

### 10 11 12 13 **Perceptions of cigarette desirability**

14  
15 Main effects multivariable logistic regression modelling suggested that in comparison to the  
16 SC, the WC (aOR=17.71; 95%CI 13.75-22.80) and GC (aOR=30.88; 95%CI 23.98-39.76)  
17  
18 were much more likely to be perceived as undesirable (i.e. less appealing, more harmful, less  
19  
20 likely to be tried). The model also indicated which smokers were more likely to rate the  
21  
22 cigarettes as undesirable: women were more likely than men (aOR=1.30; 95%CI 1.10-1.54),  
23  
24 and low SES more likely than those not low SES (aOR=1.26; 95%CI 1.06-1.50), to consider  
25  
26 all three cigarettes undesirable. Compared to exclusive factory-made cigarette smokers, those  
27  
28 who also smoked roll-your-own cigarettes (aOR=0.78; 95%CI 0.65-0.93) or other tobacco  
29  
30 products (aOR=0.73; 95%CI 0.56-0.93) were less likely to consider all three cigarettes  
31  
32 undesirable. Those not likely to make a quit attempt in the next six months were less likely  
33  
34 than those likely to make a quit attempt in the next six months (aOR=0.62; 95%CI 0.49-0.78)  
35  
36 to consider all three cigarettes undesirable.

37  
38  
39  
40  
41 Only one significant interaction, between cigarette type and SES, was found ( $p < 0.05$ ).

42  
43 Both SES groups perceived the WC significantly more undesirable than the SC, and the GC  
44  
45 significantly more undesirable than the WC. Low SES were significantly more likely than  
46  
47 those not low SES to perceive the SC (aOR=17.71; 95%CI 13.75-22.80) and GC  
48  
49 (aOR=30.88; 95%CI 23.98-39.76) as undesirable; there was no difference for the WC  
50  
51 (aOR=0.99; 95%CI 0.78-1.25).  
52  
53  
54  
55  
56  
57  
58  
59  
60

## DISCUSSION

Our findings suggest that inserts highlighting the benefits of quitting or providing tips on how to do so may have the potential to encourage cessation, and dissuasive cigarettes may help to reduce the desirability of smoking. Just as tobacco companies have used inserts and cigarette design to create interest in their products, our study suggests that greater attention to how these could be used to promote cessation appears warranted.

Health messages need to capture attention to be effective.<sup>32</sup> In this regard, at least half our sample indicated that they would read inserts (50%) and read them if interested in quitting (60%). In Canada, an observational study found that approximately a quarter of smokers reported reading them at least once within the last month,<sup>10</sup> increasing to about one-third of smokers over two years of follow-up.<sup>11</sup> As in our study, smokers in Canada who had read/would read the inserts were more likely to be female, intend to quit or had recently tried to quit; in our study, they were also more likely to be white British, have moderate dependence, and use factory-made cigarettes and other tobacco products. Future research could explore why dual users (smokers of factory-made cigarettes and other tobacco products) were more likely to indicate that they would read inserts, but as inserts are typically only found in cigarette packs then for those who use other tobacco products they may be seen as more of a novelty and therefore more likely to capture attention.

Approximately three-fifths (61%) of smokers in our study thought that inserts were a good way to provide information about quitting to smokers, with only 25% disagreeing. In comparison, an earlier study in Canada, commissioned by Health Canada, found that 48% of smokers indicated that messaging on inserts was a good way to provide information to smokers, with 47% disagreeing.<sup>5</sup> Just over half our sample agreed/strongly agreed that inserts may make them think more about quitting, help them if they decided to quit, and that they are

1  
2  
3 an effective way of encouraging smokers to quit, whereas in New Zealand only 34% of  
4 smokers and recent quitters agreed/strongly agreed that inserts would be an effective way of  
5 encouraging reduced consumption or quitting.<sup>6</sup> There may be various reasons for the  
6 differences between our findings and earlier research. For instance, when this earlier research  
7 was conducted cigarette packs displayed text-only health warnings and it may be that having  
8 pictorial warnings on packs, as is required in Scotland, may prompt smokers to look for  
9 information on how to quit and the benefits of doing so. Insert design is also likely to be  
10 relevant. Whereas the inserts used in earlier research were limited to text, the inserts used in  
11 this study (which have been used in Canada since 2012) included coloured graphics, which is  
12 typical of promotional inserts used by tobacco companies and likely enhanced their impact.  
13 This would be consistent with the health communications and warnings literature, which  
14 demonstrates the importance of supporting text with pictorials.<sup>32,33</sup> Future research exploring  
15 insert design (e.g. use of imagery, inclusion of cessation resource information, length and  
16 framing of messages, etc) would be of value.  
17  
18  
19  
20  
21  
22  
23  
24  
25  
26  
27  
28  
29  
30  
31  
32

33 More than half our sample supported the inclusion of inserts promoting cessation  
34 inside every cigarette pack, with only a fifth opposing this. Within the European Union, the  
35 recent Tobacco Products Directive (TPD)<sup>34</sup> does not require tobacco companies to include  
36 health communication inserts in packs, but allows member states to introduce measures  
37 beyond those specified. Among governmental representatives that responded to the  
38 consultation on the revision of the TPD there was strong support for improving consumer  
39 information via mandatory pictorial warnings, with those supportive arguing that additional  
40 information, such as pack inserts, would help to deliver more accurate health information.<sup>35</sup> If  
41 there is support for inserts among governmental representatives, and little opposition among  
42 smokers (the group most likely to be resistant), they are clearly a viable option for regulators.  
43  
44  
45  
46  
47  
48  
49  
50  
51  
52  
53

54 Tobacco industry journals describe the cigarette as an increasingly important  
55  
56  
57

1  
2  
3 advertising medium for tobacco companies.<sup>12</sup> However, until recently, the public health focus  
4  
5 has been on the potential of regulating the contents of cigarettes to reduce palatability or  
6  
7 addictiveness,<sup>36</sup> with little consideration of the possibility of regulating the appearance of  
8  
9 cigarettes to reduce its importance as a promotional tool. We found that the two dissuasive  
10  
11 cigarettes were perceived as significantly more harmful and less appealing than the standard  
12  
13 cigarette, and less likely to encourage trial. The harm, appeal and trial items loaded onto a  
14  
15 single ‘undesirability’ factor, with the dissuasive cigarettes considered much more  
16  
17 undesirable than the standard cigarette. The findings are consistent with earlier research,  
18  
19 where cigarettes with the warning ‘Smoking kills’ were considered a constant reminder of the  
20  
21 associated harms and, partly due to the perceived discomfort of being observed by others  
22  
23 smoking a cigarette displaying this message, unappealing for smokers.<sup>8,16,17,18</sup> Previous  
24  
25 studies have also found unattractively coloured cigarettes to be perceived as more harmful  
26  
27 than other cigarettes and also repellent, being a cigarette that young people did not think that  
28  
29 others their age would use.<sup>15,16,37,38</sup> As with the inserts, the dissuasive cigarettes (and also the  
30  
31 standard cigarette) were considered more desirable among dual users than exclusive factory-  
32  
33 made cigarette smokers; again it is not clear why this was the case but further research with  
34  
35 dual users, or indeed those also using vaping devices (not assessed in this study), would be  
36  
37 fruitful.  
38  
39  
40

41  
42 In terms of limitations, the cross-sectional design did not allow us to assess causality;  
43  
44 that inserts and dissuasive cigarettes are not available on the UK market prevents more robust  
45  
46 study designs such as longitudinal studies. Another potential limitation concerns the novelty  
47  
48 of the stimuli, which may have influenced responses, and forced exposure to the stimuli. In  
49  
50 addition, we only used four inserts, rather than the full set of eight used in Canada, which  
51  
52 includes inserts that be less relevant to our sample. While online surveys have been used for  
53  
54 previous research exploring cigarette packaging, inserts and dissuasive cigarettes,<sup>39-42</sup> and are  
55  
56  
57  
58  
59  
60



1  
2  
3 a suitable survey mode for young adults, the use of an online panel and self-selection limits  
4 the representativeness of our sample. In addition, the use of semantic differential scales can  
5 be criticised because answers can be subject to various response biases, although we  
6 attempted to diminish these through varying scale item direction and through our multivariate  
7 modelling methodology.  
8  
9  
10  
11  
12

13  
14 It was argued, over two decades ago, that to offer greater protection to consumers  
15 cigarettes should come in plain packs with messaging on both the pack exterior and interior.<sup>43</sup>  
16 This idea is a step closer in the UK, although there will still be no messaging on the pack  
17 interior. That more than half of the participants in this study suggested that inserts may help  
18 to promote cessation suggests that their inclusion in packs may be a meaningful supplement  
19 to the on-pack warnings. Our findings suggest however that to offer the greatest protection to  
20 consumers, it may be beneficial to supplement plain packaging and inserts with cigarettes  
21 designed to be dissuasive. Unattractively coloured cigarettes would complement the  
22 unattractively coloured packs, just as warnings on the cigarette would extend the warnings on  
23 the cigarette pack. Both options are clearly viable.  
24  
25  
26  
27  
28  
29  
30  
31  
32  
33  
34  
35  
36

37 **Contributors** CM designed the data collection tool and drafted and revised the paper. RH  
38 analysed the data and drafted the Analysis and Results. JT and GR helped design the data  
39 collection tool and commented on the paper. All authors read and approved the final  
40 manuscript.  
41  
42  
43  
44

45  
46 **Funding** This work was supported by Health Scotland. GR, who works for Health Scotland,  
47 provided feedback on the survey and paper, but was not involved in the collection, analysis  
48 and interpretation of the data.  
49  
50  
51

52 **Competing interests** GR works for Health Scotland, who funded this study.  
53  
54  
55  
56  
57

1  
2  
3 **Ethics approval** The study obtained ethics approval from the School of Health Sciences  
4  
5 Ethics Committee at the University of Stirling. Participants provided informed consent before  
6  
7 participating.  
8

9 **Provenance and peer review** Not commissioned; externally peer reviewed.  
10

11 **Data sharing statement** No additional data are available.  
12  
13  
14  
15  
16  
17  
18  
19  
20  
21  
22  
23  
24  
25  
26  
27  
28  
29  
30  
31  
32  
33  
34  
35  
36  
37  
38  
39  
40  
41  
42  
43  
44  
45  
46  
47  
48  
49  
50  
51  
52  
53  
54  
55  
56  
57  
58  
59  
60

For peer review only

## REFERENCES

1. Canadian Cancer Society. *Cigarette package health warnings. International status report (Fifth edition)*; 2016. [www.tobaccolabels.ca/wp/wp-content/uploads/2016/11/Cigarette-Package-Health-Warnings-International-Status-Report-English-CCS-Oct-2016.pdf](http://www.tobaccolabels.ca/wp/wp-content/uploads/2016/11/Cigarette-Package-Health-Warnings-International-Status-Report-English-CCS-Oct-2016.pdf) (accessed 10 Sept 2017).
2. Hammond D. Health warning messages on tobacco products: a review. *Tob Control* 2011;20:327–37.
3. Mahood G. *Canada's tobacco package label or warning system: "telling the truth" about tobacco product risks*. Geneva: WHO; 2010.
4. Tandemar Research Inc. *Tobacco health warning messages, inserts and toxic constituents information study - Final Report*. Toronto: Tandemar Research Inc, 1992.
5. Environics. *Health warning messages on the flip/side and inserts of cigarette packaging. A survey of smokers. A report prepared for Health Canada*; 2000.
6. BRC Marketing and Social Research. *Smoking health warnings study. Wellington: Ministry of Health*; 2004. [www.tobaccolabels.ca/wp/wp-content/uploads/2013/12/NZ-2004-Effectiveness-of-Different-Health-Warnings-in-Helping-People-Consider-Their-Smoking-Related-Behaviour-Government-Report.pdf](http://www.tobaccolabels.ca/wp/wp-content/uploads/2013/12/NZ-2004-Effectiveness-of-Different-Health-Warnings-in-Helping-People-Consider-Their-Smoking-Related-Behaviour-Government-Report.pdf) (accessed 12 Aug 2017).
7. Gallopel-Morvan K, Moodie C, Hammond D, *et al*. Consumer understanding of cigarette emission labelling. *Eur J Pub Health* 2011;21:373-5.
8. Moodie C. Novel ways of using tobacco packaging to communicate health messages: Interviews with packaging and marketing experts. *Addict Res Theory* 2016;24:54-61.
9. Moodie C. Adult smokers' perceptions of cigarette pack inserts promoting cessation: A focus group study. *Tob Control* 2018;27:72-7.

- 1  
2  
3 10. Thrasher JT, Osman A, Abad EN, *et al.* The innovative use of cigarette package  
4 inserts to supplement pictorial health warnings: An evaluation of the Canadian policy.  
5  
6  
7 *Nicot Tob Res* 2015;17:870-5.  
8
- 9 11. Thrasher JF, Swayampakala K, Cummings KM, *et al.* Cigarette package inserts can  
10 promote efficacy beliefs and sustained smoking cessation attempts: A longitudinal  
11 assessment of an innovative policy in Canada. *Prev Med* 2016;88:59–65.  
12
- 13 12. Rossell S. Ready to roll. *Tob Report* 2017;2:44-5.  
14
- 15 13. Smith KC, Washington C, Welding K, *et al.* Cigarette stick as valuable  
16 communicative real estate: a content analysis of cigarettes from 14 low-income and  
17 middle-income countries. *Tob Control* 2017;26:604-7.  
18
- 19 14. Hedley D. Tobacco wars: A new hope - the changing future. *Tob J Int* 2015;3:31-4.  
20
- 21 15. Hoek J, Robertson C. How do young adult female smokers interpret dissuasive  
22 cigarettes? *J Social Marketing* 2015;5:21–39.  
23
- 24 16. Hoek J, Gendall P, Eckert C, *et al.* Dissuasive cigarette sticks: the next step in  
25 standardised ('plain') packaging? *Tob Control* 2016;15:699-705.  
26
- 27 17. Moodie C, Purves R, McKell J, *et al.* Novel means of using cigarette packaging and  
28 cigarettes to communicate health risk and cessation messages: A qualitative study.  
29  
30 *Internat J Mental Health Addiction* 2015;13:333-44.  
31
- 32 18. Moodie C, Mackintosh AM, Gallopel-Morvan K, *et al.* Adolescents' perceptions of  
33 health warnings on cigarettes. *Nicot Tob Res* 2017;29:1232-7.  
34
- 35 19. Hassan L, Shui E. No place to hide: two pilot studies assessing the effectiveness of  
36 adding a health warning to the cigarette cigarette. *Tob Control* 2015;24:e3-5.  
37
- 38 20. ONS. *Internet users in the UK: 2017.*  
39  
40  
41  
42 [www.ons.gov.uk/businessindustryandtrade/itandinternetindustry/bulletins/internetuser](http://www.ons.gov.uk/businessindustryandtrade/itandinternetindustry/bulletins/internetuser)  
43  
44 [s/2017](http://www.ons.gov.uk/businessindustryandtrade/itandinternetindustry/bulletins/internetuser) (accessed 15 Sept 2017).  
45  
46  
47  
48  
49  
50  
51  
52  
53  
54  
55  
56  
57

- 1  
2  
3 21. Hoek J, Gendall P, Eckert C, *et al.* Effects of brand variants on smokers' choice  
4 behaviours and risk perceptions. *Tob Control* 2016;25:160-5.  
5  
6
- 7 22. Moodie C, Sinclair L, Mackintosh AM, *et al.* How tobacco companies are perceived  
8 within the UK: An online panel. *Nicot Tob Res* 2016;18:1766-72.  
9  
10
- 11 23. Kozlowski LT, Porter CQ, Orleans T, *et al.* Predicting smoking cessation with self-  
12 reported measures of nicotine dependence: FTQ, FTND, and HSI. *Drug Alcohol*  
13 *Depend* 1994;34:211-6.  
14  
15
- 16 24. Etter JF, Sutton S. Assessing 'stage of change' in current and former smokers Trying  
17 to stop smoking: effects of perceived addiction, attributions for failure, and  
18 expectancy of success. *Addiction* 2002;97:1171-82.  
19  
20
- 21 25. Hammond D, Fong GT, McDonald PW, *et al.* Impact of the graphic Canadian  
22 warning labels on adult smoking behaviour. *Tob Control* 2003;12:391-5.  
23  
24
- 25 26. IARC. *IARC Handbooks of Cancer Prevention, Tobacco Control, Vol. 12: Methods*  
26 *for Evaluating Tobacco Control Policies*. Lyon, France: International Agency for  
27 Research on Cancer; 2008.  
28  
29
- 30 27. Rasbash J, Browne W, Healy M, *et al.* *A user's guide to MLwiN, version 2.3*. Bristol:  
31 Centre for multilevel modelling, University of Bristol; 2015.  
32  
33
- 34 28. Salmond C. *Fitting complex models using health survey data*; 2006.  
35  
36 [www.otago.ac.nz/wellington/otago020178.pdf](http://www.otago.ac.nz/wellington/otago020178.pdf) (accessed 15 Sept 2017).  
37  
38
- 39 29. Goldstein H, Rasbash J. Improved approximations for multilevel models with binary  
40 responses. *J Royal Statistical Society. Series A (Statistics in Society)* 1996;159:505-  
41 13.  
42  
43
- 44 30. Blakely T, Woodward A, Salmond C. Anonymous linkage of New Zealand mortality  
45 and Census data. *Australian NZ J Pub Health* 2000;24:92-5  
46  
47  
48  
49  
50  
51  
52  
53  
54  
55  
56  
57  
58  
59  
60

- 1  
2  
3 31. Hiscock R, Murray S, Brose LS, *et al.* Behavioural therapy for smoking cessation:  
4 The effectiveness of different intervention types for disadvantaged and affluent  
5 smokers. *Addictive Behaviors* 2013;38:2787-96.  
6  
7  
8  
9 32. Wogalter MS, Conzola VC, Smith-Jackson TL. Research-based guidelines for  
10 warning design and evaluation. *Applied Ergonomics* 2002;33:219-30.  
11  
12  
13 33. Houts PD, Doak CC, Doak LG, *et al.* The role of pictures in improving health  
14 communication: A review of research on attention, comprehension, recall, and  
15 adherence. *Patient Educ Couns* 2006;61:173-90.  
16  
17  
18  
19  
20 34. European Commission. Directive 2014/40/EU of the European parliament and of the  
21 Council of 3 April 2014 on the approximation of the laws, regulations and  
22 administrative provisions of the Member States concerning the manufacture,  
23 presentation and sale of tobacco and related products and repealing Directive  
24 2001/37/EC. *Official Journal of the European Union* 2014;L127:1-38.  
25  
26  
27  
28  
29  
30  
31 35. European Commission. *Report on the public consultation on the possible revision of*  
32 *the Tobacco Products Directive (2001/37/EC)*. Health and Consumers Directorate-  
33 General – Directorate D – Health systems and products D4 – Substances of human  
34 origin and tobacco control. 2011.  
35  
36  
37  
38  
39 [http://ec.europa.eu/health/tobacco/docs/consultation\\_report\\_en.pdf](http://ec.europa.eu/health/tobacco/docs/consultation_report_en.pdf) (accessed 10 Sept  
40 2017).  
41  
42  
43  
44 36. Warner K. The national and international regulatory environment in tobacco control.  
45 *Pub Health Res Practice* 2015;25:e2531527.  
46  
47  
48  
49 37. Ford A, Moodie C, Mackintosh AM, *et al.* Adolescent perceptions of cigarette  
50 appearance. *Eur J Pub Health* 2014;24:464-8.  
51  
52  
53  
54  
55  
56  
57  
58  
59  
60

- 1  
2  
3 38. Moodie C, Ford A, Mackintosh AM, *et al.* Are all cigarettes just the same? Female's  
4 perceptions of slim, coloured, aromatised and capsule cigarettes. *Health Educ Res*  
5 2015;30:1-12.  
6  
7  
8  
9 39. Doxey J, Hammond D. Deadly in pink: The impact of female-oriented cigarette  
10 packaging among young women. *Tob Control* 2011;20:353-60.  
11  
12  
13 40. White CM, Hammond D, Thrasher JF, *et al.* The potential impact of plain packaging  
14 of cigarette products among Brazilian young women: an experimental study. *BMC*  
15 *Public Health* 2012;12:737.  
16  
17  
18  
19 41. Kotnowski K, Fong GT, Gallopel-Morvan K, *et al.* The impact of cigarette packaging  
20 design among young females in Canada: findings from a discrete choice experiment.  
21 *Nicot Tob Res* 2016;18:1348-56.  
22  
23  
24  
25  
26 42. Hoek J, Gendall P, Maubach N, *et al.* Strong public support for plain packaging of  
27 tobacco products. *Austr N Z J Pub Health* 2012;36:405-7.  
28  
29  
30  
31 43. Mahood G. Canada tobacco package warning system. *Tob Control* 1995;4:10-4.  
32  
33  
34  
35  
36  
37  
38  
39  
40  
41  
42  
43  
44  
45  
46  
47  
48  
49  
50  
51  
52  
53  
54  
55  
56  
57  
58  
59  
60

**Table 1:** Sample and smoking-related characteristics

| <i>Characteristic</i>                                            | <i>N</i> | <i>%</i> |
|------------------------------------------------------------------|----------|----------|
| Total                                                            | 1766     | 100.0    |
| <b>Age group</b>                                                 |          |          |
| 16-19                                                            | 413      | 23.4     |
| 20-24                                                            | 401      | 22.7     |
| 25-34                                                            | 952      | 53.9     |
| <b>Gender</b>                                                    |          |          |
| Male                                                             | 888      | 50.3     |
| Female                                                           | 878      | 49.7     |
| <b>Educational qualifications</b>                                |          |          |
| Other qualifications                                             | 1357     | 76.8     |
| None or GCSE                                                     | 409      | 23.2     |
| <b>Economic status</b>                                           |          |          |
| Other status                                                     | 1350     | 76.4     |
| Routine or manual occupation, unemployed or long term sick       | 416      | 23.6     |
| <b>Socioeconomic status (SES)</b>                                |          |          |
| No indicators of low SES                                         | 1114     | 63.1     |
| Low education and/or low SES                                     | 652      | 36.9     |
| <b>Ethnicity</b>                                                 |          |          |
| White British                                                    | 1264     | 71.6     |
| White non-British                                                | 162      | 9.2      |
| Black (including mixed black and white)                          | 79       | 4.5      |
| Asian (including mixed Asian and white)                          | 196      | 11.1     |
| Other or not declared                                            | 65       | 3.7      |
| <b>Location</b>                                                  |          |          |
| England                                                          | 1550     | 87.8     |
| Scotland                                                         | 109      | 6.2      |
| Wales                                                            | 73       | 4.1      |
| Northern Ireland                                                 | 34       | 1.9      |
| <b>Tobacco products used</b>                                     |          |          |
| Only factory-made (packet) cigarettes                            | 813      | 46.0     |
| Factory-made and roll-your-own cigarettes                        | 681      | 38.6     |
| Factory-made cigarettes and other products (e.g. cigars, shisha) | 272      | 15.4     |
| <b>Cigarettes per day</b>                                        |          |          |
| 10 or less                                                       | 1272     | 72.0     |
| 11-20                                                            | 433      | 24.5     |
| 21-30                                                            | 46       | 2.6      |
| 31 or more                                                       | 15       | 0.8      |
| <b>Time to first cigarette</b>                                   |          |          |
| Within 5 minutes                                                 | 263      | 14.9     |
| 6 to 30 minutes                                                  | 570      | 32.3     |
| 31 to 60 minutes                                                 | 315      | 17.8     |



| <i>Characteristic</i>                                                                                                                            | <i>N</i> | <i>%</i> |
|--------------------------------------------------------------------------------------------------------------------------------------------------|----------|----------|
| After 60 minutes                                                                                                                                 | 618      | 35.0     |
| <b>Heaviness of Smoking Index (HSI)</b>                                                                                                          |          |          |
| 0 little dependence                                                                                                                              | 601      | 34.0     |
| 1                                                                                                                                                | 257      | 14.6     |
| 2                                                                                                                                                | 418      | 23.7     |
| 3                                                                                                                                                | 293      | 16.6     |
| 4                                                                                                                                                | 156      | 8.8      |
| 5                                                                                                                                                | 28       | 1.6      |
| 6 high dependence                                                                                                                                | 13       | 0.7      |
| <b>Dependence (Tertiles of HSI)</b>                                                                                                              |          |          |
| Low-dependence                                                                                                                                   | 601      | 34.0     |
| Mid-dependence                                                                                                                                   | 675      | 38.2     |
| High-dependence                                                                                                                                  | 490      | 27.7     |
| <b>Made an attempt to quit smoking that lasted at least 24 hours?</b>                                                                            |          |          |
| Yes, within the last six months                                                                                                                  | 788      | 44.6     |
| Yes, more than six months ago                                                                                                                    | 552      | 31.3     |
| No, I have never tried to quit smoking for more than 24 hours                                                                                    | 426      | 24.1     |
| <b>How likely are you to try to quit smoking within the next six months?</b>                                                                     |          |          |
| Not at all                                                                                                                                       | 198      | 11.2     |
| A little                                                                                                                                         | 382      | 21.6     |
| Moderately                                                                                                                                       | 508      | 28.8     |
| Very                                                                                                                                             | 308      | 17.4     |
| Extremely                                                                                                                                        | 272      | 15.4     |
| Don't know                                                                                                                                       | 98       | 5.5      |
| <b>If you decided to quit smoking in the next six months, how sure are you that you would succeed?</b>                                           |          |          |
| Not at all                                                                                                                                       | 147      | 8.3      |
| A little                                                                                                                                         | 346      | 19.6     |
| Moderately                                                                                                                                       | 612      | 34.7     |
| Very                                                                                                                                             | 297      | 16.8     |
| Extremely                                                                                                                                        | 241      | 13.6     |
| Don't know                                                                                                                                       | 123      | 7.0      |
| <b>Quit approach</b>                                                                                                                             |          |          |
| Moderately or less likely to make quit attempt in next six months (unlikely to make a quit attempt in the next six months)                       | 1186     | 67.2     |
| Very or extremely likely to attempt but moderately or less likely to succeed (unlikely to make a successful quit attempt in the next six months) | 304      | 17.2     |
| Very or extremely likely to attempt and very or extremely likely to succeed (likely to make a successful quit attempt in the next six months)    | 276      | 15.6     |

**Table 2:** Perceptions of whether inserts would be read, are a good way to provide information, whether they would help smokers to think about quitting or quit, and support for them

|                                                       | <b>Yes</b>   | <b>No</b>       | <b>Not sure</b>             |
|-------------------------------------------------------|--------------|-----------------|-----------------------------|
|                                                       | <b>%</b>     | <b>%</b>        | <b>%</b>                    |
| <b>Would they be read</b>                             | 50           | 37              | 13                          |
| <b>Would they be read if interested in quitting</b>   | 60           | 25              | 15                          |
| <b>Good way to provide information about quitting</b> | 61           | 25              | 14                          |
|                                                       | <b>Agree</b> | <b>Disagree</b> | <b>Neither / Don't know</b> |
|                                                       | <b>%</b>     | <b>%</b>        | <b>%</b>                    |
| <b>Make you think more about quitting</b>             | 53           | 18              | 29                          |
| <b>Might help you if you decided to quit</b>          | 52           | 19              | 29                          |
| <b>Effective way of encouraging smokers to quit</b>   | 53           | 17              | 30                          |
| <b>All packs should have inserts</b>                  | 55           | 20              | 25                          |

**Table 3a:** Logistic regression models exploring perceptions of inserts by sociodemographic characteristics (gender, age, education, ethnicity)<sup>1,2</sup>

| (n=1766)                                   | Would read insert   | Would read insert if trying to quit | Inserts make you think about quitting | Inserts might help you quit | Inserts a good way of providing information about quitting | Inserts are an effective way of encouraging smokers to quit | All packs should have inserts |
|--------------------------------------------|---------------------|-------------------------------------|---------------------------------------|-----------------------------|------------------------------------------------------------|-------------------------------------------------------------|-------------------------------|
| <b>Gender</b>                              |                     |                                     |                                       |                             |                                                            |                                                             |                               |
| <b>Male</b>                                | 1                   | 1                                   | 1                                     | 1                           | 1                                                          | 1                                                           | 1                             |
| <b>Female</b>                              | 1.24 (1.02 to 1.50) | 1.11 (0.91 to 1.35)                 | 0.98 (0.81 to 1.19)                   | 0.95 (0.79 to 1.15)         | 1.13 (0.93 to 1.37)                                        | 0.88 (0.73 to 1.07)                                         | 1.20 (0.99 to 1.46)           |
| <b>Age</b>                                 |                     |                                     |                                       |                             |                                                            |                                                             |                               |
| <b>16-19</b>                               | 1                   | 1                                   | 1                                     | 1                           | 1                                                          | 1                                                           | 1                             |
| <b>20-24</b>                               | 1.16 (0.87 to 1.54) | 0.88 (0.66 to 1.18)                 | 1.18 (0.89 to 1.56)                   | 1.19 (0.89 to 1.58)         | 0.87 (0.65 to 1.16)                                        | 0.97 (0.73 to 1.28)                                         | 0.96 (0.72 to 1.29)           |
| <b>25-34</b>                               | 1.25 (0.97 to 1.60) | 0.83 (0.65 to 1.07)                 | 0.99 (0.78 to 1.26)                   | 1.18 (0.92 to 1.50)         | 0.76 (0.60 to 0.98)                                        | 0.88 (0.69 to 1.12)                                         | 0.84 (0.65 to 1.07)           |
| <b>Education</b>                           |                     |                                     |                                       |                             |                                                            |                                                             |                               |
| <b>GCSEs (or equivalent) or none</b>       | 1                   | 1                                   | 1                                     | 1                           | 1                                                          | 1                                                           | 1                             |
| <b>More than GCSEs (or equivalent)</b>     | 1.25 (0.99 to 1.58) | 1.12 (0.89 to 1.42)                 | 1.22 (0.97 to 1.54)                   | 1.21 (0.97 to 1.52)         | 1.12 (0.89 to 1.40)                                        | 1.19 (0.95 to 1.50)                                         | 1.10 (0.87 to 1.40)           |
| <b>Ethnicity</b>                           |                     |                                     |                                       |                             |                                                            |                                                             |                               |
| <b>White British</b>                       |                     | 1                                   | 1                                     |                             |                                                            |                                                             | 1                             |
| <b>White but not British</b>               |                     | 0.70 (0.50 to 0.98)                 | 0.58 (0.41 to 0.81)                   |                             |                                                            |                                                             | 0.62 (0.44 to 0.87)           |
| <b>Black (inc mixed black &amp; white)</b> |                     | 0.92 (0.57 to 1.49)                 | 0.61 (0.38 to 0.98)                   |                             |                                                            |                                                             | 0.99 (0.62 to 1.59)           |
| <b>Asian (inc mixed Asian &amp; white)</b> |                     | 0.67 (0.49 to 0.92)                 | 1.19 (0.87 to 1.63)                   |                             |                                                            |                                                             | 0.70 (0.51 to 0.96)           |
| <b>other or not declared</b>               |                     | 0.84 (0.50 to 1.42)                 | 1.06 (0.64 to 1.78)                   |                             |                                                            |                                                             | 1.08 (0.64 to 1.81)           |

<sup>1</sup>Note smoking related characteristics (described in table 3b) were also entered into each model

<sup>2</sup>Blank cells indicate no significant relationship in bivariate analysis

1  
2  
3  
4  
5  
6  
7  
8  
9  
10  
11  
12  
13  
14  
15  
16  
17  
18  
19  
20  
21  
22  
23  
24  
25  
26  
27  
28  
29  
30  
31  
32  
33  
34  
35  
36  
37  
38  
39  
40  
41  
42  
43  
44  
45  
46  
47

**Table 3b:** Logistic regression models exploring perceptions of inserts by smoking related characteristics (dependence, tobacco products smoked, quit attempts, self-efficacy to quit)<sup>1,2</sup>

| (n=1766)                                         | Would read insert   | Would read insert if trying to quit | Inserts make you think about quitting | Inserts might help you quit | Inserts a good way of providing information about quitting | Inserts are an effective way of encouraging smokers to quit | All packs should have inserts |
|--------------------------------------------------|---------------------|-------------------------------------|---------------------------------------|-----------------------------|------------------------------------------------------------|-------------------------------------------------------------|-------------------------------|
| <b>Dependence (tertiles of HSI)</b>              |                     |                                     |                                       |                             |                                                            |                                                             |                               |
| Lower dependence                                 | 1                   |                                     |                                       |                             |                                                            |                                                             | 1                             |
| Mid dependence                                   | 1.39 (1.11 to 1.76) |                                     |                                       |                             |                                                            |                                                             | 1.02 (0.80 to 1.29)           |
| Higher dependence                                | 1.22 (0.94 to 1.59) |                                     |                                       |                             |                                                            |                                                             | 0.86 (0.66 to 1.12)           |
| <b>Tobacco products smoked</b>                   |                     |                                     |                                       |                             |                                                            |                                                             |                               |
| Only factory-made                                | 1                   | 1                                   | 1                                     | 1                           |                                                            | 1                                                           |                               |
| Factory-made and roll-your-own                   | 1.35 (1.09 to 1.66) | 1.61 (1.30 to 2.00)                 | 1.31 (1.06 to 1.62)                   | 1.31 (1.06 to 1.61)         |                                                            | 1.27 (1.03 to 1.56)                                         |                               |
| Factory-made cigarettes and other                | 1.20 (0.90 to 1.59) | 1.39 (1.04 to 1.86)                 | 1.22 (0.92 to 1.63)                   | 1.34 (1.01 to 1.78)         |                                                            | 1.20 (0.91 to 1.60)                                         |                               |
| <b>Quit attempt lasting at least 24 hours</b>    |                     |                                     |                                       |                             |                                                            |                                                             |                               |
| No                                               | 1                   | 1                                   | 1                                     | 1                           | 1                                                          | 1                                                           | 1                             |
| Yes, more than six months ago                    | 1.30 (1.00 to 1.69) | 1.12 (0.86 to 1.45)                 | 1.20 (0.93 to 1.56)                   | 1.05 (0.81 to 1.36)         | 1.16 (0.90 to 1.50)                                        | 1.07 (0.82 to 1.38)                                         | 0.78 (0.60 to 1.01)           |
| Yes within the last six months                   | 1.67 (1.29 to 2.15) | 1.51 (1.17 to 1.94)                 | 1.46 (1.14 to 1.88)                   | 1.35 (1.05 to 1.73)         | 1.54 (1.20 to 1.98)                                        | 1.33 (1.04 to 1.71)                                         | 1.06 (0.82 to 1.37)           |
| <b>Efficacy of quit attempt in next 6 months</b> |                     |                                     |                                       |                             |                                                            |                                                             |                               |
| Likely to quit                                   | 1                   | 1                                   | 1                                     | 1                           | 1                                                          | 1                                                           | 1                             |
| Likely to make unsuccessful attempt              | 1.01 (0.72 to 1.40) | 1.43 (1.00 to 2.06)                 | 0.97 (0.69 to 1.37)                   | 0.92 (0.65 to 1.29)         | 1.46 (1.02 to 2.08)                                        | 1.10 (0.78 to 1.55)                                         | 1.43 (1.00 to 2.04)           |
| Unlikely to make attempt                         | 0.58 (0.44 to 0.75) | 0.74 (0.55 to 0.99)                 | 0.59 (0.45 to 0.78)                   | 0.51 (0.38 to 0.67)         | 0.76 (0.57 to 1.01)                                        | 0.55 (0.41 to 0.73)                                         | 0.56 (0.42 to 0.74)           |

<sup>1</sup>Note sociodemographic characteristics (described in table 3a) were also entered into each model

<sup>2</sup>Blank cells indicate no significant relationship in bivariate analysis

**Table 4:** Perceptions of cigarette design (harm, appeal, trial)

|                                             | <b>Standard<br/>cigarette</b> | <b>Cigarette with<br/>warning</b> | <b>Green<br/>cigarette</b> |
|---------------------------------------------|-------------------------------|-----------------------------------|----------------------------|
|                                             | <b>%<sup>1</sup></b>          | <b>%<sup>1</sup></b>              | <b>%<sup>1</sup></b>       |
| <b>Harmful to health</b>                    | 38.8                          | 69.1*                             | 70.2*                      |
| <b>Think of dangers</b>                     | 20.9                          | 58.1*#                            | 53.5*                      |
| <b>Unattractive</b>                         | 25.2                          | 61.7*                             | 68.7*                      |
| <b>Unstylish</b>                            | 37.4                          | 66.0*                             | 69.4*                      |
| <b>Not nice to be seen with</b>             | 19.8                          | 55.2*                             | 60.2*                      |
| <b>Not appealing to people<br/>my age</b>   | 17.8                          | 51.5*                             | 57.4*                      |
| <b>Likely trial (personally)</b>            | 79.4                          | 35.7*                             | 21.5*                      |
| <b>Likely trial (for never<br/>smokers)</b> | 70.1                          | 21.1*                             | 16.5*                      |

<sup>1</sup> Percentages shown indicate an answer within the three highest agreement categories on a seven point semantic scale.

\* Significant difference in comparison to the standard cigarette (p<0.001)

# Significant difference in comparison to the green cigarette (p<0.05)

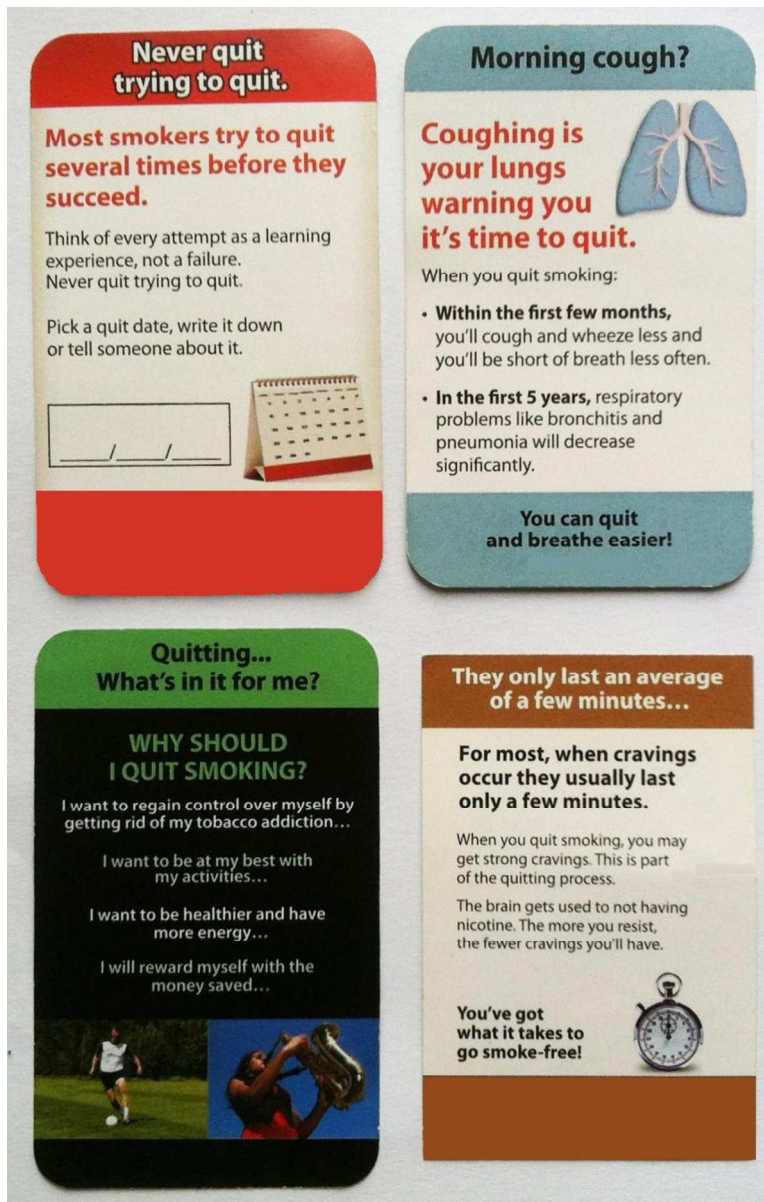

Figure 1 Pack inserts highlighting the benefits of quitting or providing tips on how to do so

142x222mm (300 x 300 DPI)

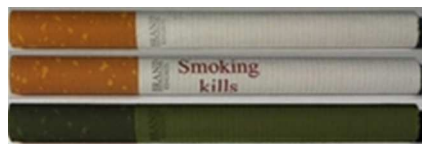

Figure 2: Standard cigarette, warning cigarette and green cigarette

17x5mm (300 x 300 DPI)

For peer review only

**STROBE 2007 (v4) checklist of items to be included in reports of observational studies in epidemiology\***  
**Checklist for cohort, case-control, and cross-sectional studies (combined)**

| Section/Topic            | Item # | Recommendation                                                                                                                                                                                               | Reported on page # |
|--------------------------|--------|--------------------------------------------------------------------------------------------------------------------------------------------------------------------------------------------------------------|--------------------|
| Title and abstract       | 1      | (a) Indicate the study's design with a commonly used term in the title or the abstract                                                                                                                       | 2                  |
|                          |        | (b) Provide in the abstract an informative and balanced summary of what was done and what was found                                                                                                          | 2-3                |
| <b>Introduction</b>      |        |                                                                                                                                                                                                              |                    |
| Background/rationale     | 2      | Explain the scientific background and rationale for the investigation being reported                                                                                                                         | 4-5                |
| Objectives               | 3      | State specific objectives, including any pre-specified hypotheses                                                                                                                                            | 6                  |
| <b>Methods</b>           |        |                                                                                                                                                                                                              |                    |
| Study design             | 4      | Present key elements of study design early in the paper                                                                                                                                                      | 6                  |
| Setting                  | 5      | Describe the setting, locations, and relevant dates, including periods of recruitment, exposure, follow-up, and data collection                                                                              | 6                  |
| Participants             | 6      | <i>Cross-sectional study</i> —Give the eligibility criteria, and the sources and methods of selection of participants                                                                                        | 6,7                |
| Variables                | 7      | Clearly define all outcomes, exposures, predictors, potential confounders, and effect modifiers. Give diagnostic criteria, if applicable                                                                     | 8-11               |
| Data sources/measurement | 8*     | For each variable of interest, give sources of data and details of methods of assessment (measurement). Describe comparability of assessment methods if there is more than one group                         | 10-12              |
| Bias                     | 9      | Describe any efforts to address potential sources of bias                                                                                                                                                    | 6                  |
| Study size               | 10     | Explain how the study size was arrived at                                                                                                                                                                    | 6                  |
| Quantitative variables   | 11     | Explain how quantitative variables were handled in the analyses. If applicable, describe which groupings were chosen and why                                                                                 | 10-12              |
| Statistical methods      | 12     | (a) Describe all statistical methods, including those used to control for confounding                                                                                                                        | 11-12              |
|                          |        | (b) Describe any methods used to examine subgroups and interactions                                                                                                                                          | 11-12              |
|                          |        | (c) Explain how missing data were addressed                                                                                                                                                                  | 7                  |
|                          |        | (d) <i>Cross-sectional study</i> —If applicable, describe analytical methods taking account of sampling strategy                                                                                             | NA                 |
|                          |        | (e) Describe any sensitivity analyses                                                                                                                                                                        | NA                 |
| <b>Results</b>           |        |                                                                                                                                                                                                              |                    |
| Participants             | 13*    | (a) Report numbers of individuals at each stage of study—eg numbers potentially eligible, examined for eligibility, confirmed eligible, included in the study, completing follow-up, and analysed            | 6,29-30            |
|                          |        | (b) Give reasons for non-participation at each stage                                                                                                                                                         | 6                  |
|                          |        | (c) Consider use of a flow diagram                                                                                                                                                                           | NA                 |
| Descriptive data         | 14*    | (a) Give characteristics of study participants (eg demographic, clinical, social) and information on exposures and potential confounders                                                                     | 26-27              |
|                          |        | (b) Indicate number of participants with missing data for each variable of interest                                                                                                                          | NA                 |
| Outcome data             | 15*    | <i>Cross-sectional study</i> —Report numbers of outcome events or summary measures                                                                                                                           | 13-16              |
| Main results             | 16     | (a) Give unadjusted estimates and, if applicable, confounder-adjusted estimates and their precision (eg, 95% confidence interval). Make clear which confounders were adjusted for and why they were included | 13-16              |
|                          |        | (b) Report category boundaries when continuous variables were                                                                                                                                                | 28-29              |



|                          |    |                                                                                                                                                                            |       |
|--------------------------|----|----------------------------------------------------------------------------------------------------------------------------------------------------------------------------|-------|
|                          |    | categorized                                                                                                                                                                |       |
|                          |    | (c) If relevant, consider translating estimates of relative risk into absolute risk for a meaningful time period                                                           | NA    |
| Other analyses           | 17 | Report other analyses done—eg analyses of subgroups and interactions, and sensitivity analyses                                                                             | 10-12 |
| <b>Discussion</b>        |    |                                                                                                                                                                            |       |
| Key results              | 18 | Summarise key results with reference to study objectives                                                                                                                   | 16-19 |
| Limitations              | 19 | Discuss limitations of the study, taking into account sources of potential bias or imprecision. Discuss both direction and magnitude of any potential bias                 | 18    |
| Interpretation           | 20 | Give a cautious overall interpretation of results considering objectives, limitations, multiplicity of analyses, results from similar studies, and other relevant evidence | 19-20 |
| Generalisability         | 21 | Discuss the generalisability (external validity) of the study results                                                                                                      | 17-19 |
| <b>Other information</b> |    |                                                                                                                                                                            |       |
| Funding                  | 22 | Give the source of funding and the role of the funders for the present study and, if applicable, for the original study on which the present article is based              | 20    |

\*Give information separately for cases and controls in case-control studies and, if applicable, for exposed and unexposed groups in cohort and cross-sectional studies.

**Note:** An Explanation and Elaboration article discusses each checklist item and gives methodological background and published examples of transparent reporting. The STROBE checklist is best used in conjunction with this article (freely available on the Web sites of PLoS Medicine at <http://www.plosmedicine.org/>, Annals of Internal Medicine at <http://www.annals.org/>, and Epidemiology at <http://www.epidem.com/>). Information on the STROBE Initiative is available at [www.strobe-statement.org](http://www.strobe-statement.org).

# BMJ Open

## Perceptions of cigarette pack inserts promoting cessation and dissuasive cigarettes among young adult smokers in the United Kingdom: A cross-sectional online survey

|                                 |                                                                                                                                                                                                      |
|---------------------------------|------------------------------------------------------------------------------------------------------------------------------------------------------------------------------------------------------|
| Journal:                        | <i>BMJ Open</i>                                                                                                                                                                                      |
| Manuscript ID                   | bmjopen-2017-019662.R2                                                                                                                                                                               |
| Article Type:                   | Research                                                                                                                                                                                             |
| Date Submitted by the Author:   | 19-Jun-2018                                                                                                                                                                                          |
| Complete List of Authors:       | Moodie, Crawford; University of Stirling, Institute for Social Marketing<br>Hiscock, Rosemary; University of Bath<br>Thrasher, Jim; University of South Carolina<br>Reid, Garth; NHS Health Scotland |
| <b>Primary Subject Heading</b>: | Smoking and tobacco                                                                                                                                                                                  |
| Secondary Subject Heading:      | Public health                                                                                                                                                                                        |
| Keywords:                       | Smoking, Packaging, Inserts, Cigarettes                                                                                                                                                              |
|                                 |                                                                                                                                                                                                      |

SCHOLARONE™  
Manuscripts

1  
2  
3 **Title:** Perceptions of cigarette pack inserts promoting cessation and dissuasive cigarettes  
4 among young adult smokers in the United Kingdom: A cross-sectional online survey  
5  
6  
7

8  
9 **Authors:** Crawford Moodie<sup>1</sup>, Rosemary Hiscock<sup>2</sup>, Jim Thrasher<sup>3</sup>, Garth Reid<sup>4</sup>  
10  
11

12  
13 **Affiliations:**  
14

15  
16 <sup>1</sup> Institute for Social Marketing, Faculty of Health Sciences and Sport, University of Stirling,  
17 Stirlingshire, Scotland  
18

19  
20 <sup>2</sup> Department for Health, University of Bath, England  
21

22 <sup>3</sup> Health Promotion, Education, and Behavior, Arnold School of Public Health, University of  
23 South Carolina, Columbia, United States  
24

25  
26 <sup>4</sup> Policy Evaluation, NHS Health Scotland, Edinburgh, Scotland  
27  
28  
29  
30

31 **Corresponding author:** Crawford Moodie, Institute for Social Marketing, Department of  
32 Health Sciences and Sport, University of Stirling, Stirlingshire, Scotland FK9 4LA. Tel: +44  
33 (0)1786 466456. Email: [c.s.moodie@stir.ac.uk](mailto:c.s.moodie@stir.ac.uk)  
34  
35  
36  
37  
38

39 **Keywords:** Smoking, Packaging, Inserts, Cigarettes  
40  
41  
42  
43

44 **Word count:** 5045  
45  
46  
47  
48  
49  
50  
51  
52  
53  
54  
55  
56  
57  
58  
59  
60

1  
2  
3 **Perceptions of cigarette pack inserts promoting cessation and dissuasive cigarettes**  
4 **among young adult smokers in the United Kingdom: A cross-sectional online survey**  
5  
6  
7

8  
9 **ABSTRACT**  
10

11 **Objectives:** To explore young adult smokers' perceptions of cigarette pack inserts promoting  
12 cessation and cigarettes designed to be dissuasive.  
13

14  
15 **Design:** Cross-sectional online survey.  
16

17  
18 **Setting:** United Kingdom.  
19

20 **Participants:** The final sample was 1766 young adult smokers, with 50.3% male and 71.6%  
21 white British. To meet the inclusion criteria participants had to be 16-34 years old and smoke  
22 factory-made cigarettes.  
23  
24

25  
26 **Primary and secondary outcome measures:** Salience of inserts, perceptions of inserts as  
27 information provision, perceptions of inserts on quitting, support for inserts, and perceived  
28 appeal, harm and trial of three cigarettes (a standard cigarette, a standard cigarette displaying  
29 the warning 'Smoking kills', and a green cigarette).  
30  
31  
32

33  
34  
35 **Results:** Half the sample indicated that they would read inserts with three-fifths indicating  
36 that they be a good way to provide information about quitting (61%). Just over half indicated  
37 that inserts would make them think more about quitting (53%), help if they decided to quit  
38 (52%), are an effective way of encouraging smokers to quit (53%), and supported having  
39 them in all packs (55%). Participants who smoked factory-made cigarettes and other tobacco  
40 products (compared to exclusive factory-made cigarette smokers), had made a quit attempt  
41 within the last six months (compared to those that had never made a quit attempt), or were  
42 likely to make a successful quit attempt in the next six months (compared to those unlikely to  
43 make a quit attempt in the next six months), were more likely to indicate that inserts could  
44 assist with cessation. Multivariable logistic regression modelling suggested that compared  
45  
46  
47  
48  
49  
50  
51  
52  
53  
54  
55  
56  
57  
58  
59  
60

1  
2  
3 with the standard cigarette, the cigarette with warning (adjusted Odds Ratio=17.71; 95%CI  
4 13.75-22.80) and green cigarette (adjusted Odds Ratio=30.88; 95%CI 23.98-39.76) were  
5  
6  
7 much less desirable (less appealing, more harmful, less likely to be tried).  
8

9 **Conclusions:** Inserts and dissuasive cigarettes offer policy makers additional ways of using  
10  
11 the pack to reduce smoking.  
12  
13

### 14 15 **Strengths and limitations of this study**

- 16  
17  
18     ▪ The main strength of this study is that it allows an insight into how young adult  
19  
20 smokers perceive two innovative tobacco control measures (pack inserts promoting  
21  
22 cessation and dissuasive cigarettes).  
23
- 24     ▪ The main limitation of the study is that it does not provide any insight into actual  
25  
26 smoking behaviour.  
27
- 28     ▪ Additional limitations include the novelty of the stimuli and forced exposure to this,  
29  
30 and the use of self-selection.  
31  
32  
33  
34  
35  
36  
37  
38  
39  
40  
41  
42  
43  
44  
45  
46  
47  
48  
49  
50  
51  
52  
53  
54  
55  
56  
57  
58  
59  
60

## INTRODUCTION

While packaging remains a key marketing driver for tobacco companies, more than 100 countries now require pictorial health warnings on cigarette packs,<sup>1</sup> which can limit pack appeal.<sup>2</sup> Some countries have gone even further by implementing plain (or standardised) packaging, which severely reduces the promotional power of the pack. The United Kingdom (UK) became the third country to fully implement standardised packaging in May 2017, following Australia in December 2012 and France in January 2017. In the UK all cigarette packs must be drab brown with pictorial warnings on 65% of the front and back of packs and additional health messages on 50% of the sides of the pack. Although these changes have reduced the ability of tobacco companies to use the pack to create favourable perceptions of the brand and of smoking, there is clearly more scope for using the packaging to dissuade consumers. Regulators and academics have typically focused on the exterior of the cigarette pack, with little consideration of how the pack interior, for instance pack inserts or cigarettes, which have long been used by tobacco companies to promote their brands, could potentially be used to encourage smokers to think about their smoking behaviour. This is the focus of our study.

Tobacco companies have used the inside of the cigarette pack to communicate with consumers since the late 19th century, via cigarette cards, coupons and promotional inserts. Only in Canada are they required, by law, to include pack inserts with health messaging. Sixteen text-only inserts were required in packs between 2000 and 2012, with nine encouraging cessation and seven providing health risk information.<sup>3</sup> These were replaced with eight new inserts, with coloured graphics and positively framed messages about the benefits of quitting or tips on how to do so, in 2012. Few studies have explored perceptions of pack inserts,<sup>4-8</sup> with only two assessing smokers' perceptions of, and responses to, the inserts used in Canada.<sup>9-11</sup> In focus group research in Scotland,<sup>9</sup> with smokers aged 16 and

1  
2  
3 over who were shown seven of the inserts used in Canada, the general view was that they  
4 would capture attention and be read due to their novelty and visibility when opening the pack.  
5  
6 Inserts were also thought to have a long lasting impact as they would be removed from the  
7 pack and remain visible within the household or elsewhere, or as litter.<sup>9</sup> The positive  
8  
9 messaging was liked and thought to increase message engagement. The inserts were often  
10  
11 preferred to the on-pack warnings, although both were deemed necessary. Some participants  
12  
13 suggested that inserts could encourage them to stop smoking, and they were generally  
14  
15 considered to have the potential to alter the behaviour of younger people, would-be smokers  
16  
17 and those wanting to quit.<sup>9</sup> In Canada, a longitudinal online survey with smokers aged 18 and  
18  
19 over found that between 26% and 31% at each wave reported having read pack inserts at least  
20  
21 once in the prior month; those intending to quit or having recently tried to do so were  
22  
23 significantly more likely to have read them.<sup>10</sup> In addition, while reading warnings on the pack  
24  
25 exterior decreased over time, reading pack inserts increased over time, with more frequent  
26  
27 reading independently associated with self-efficacy to quit, quit attempts, and sustained  
28  
29 quitting at follow-up.<sup>11</sup>  
30  
31  
32  
33  
34

35 The cigarette itself is also an important communications tool,<sup>12,13</sup> which has long been  
36  
37 used by tobacco companies as a marketing device but has yet to be used by regulators to deter  
38  
39 smoking. As cigarettes are primarily responsible for tobacco related mortality and morbidity  
40  
41 and predicted to continue to dominate the global market for some time yet,<sup>14</sup> research  
42  
43 exploring the potential impact of standardising the appearance of cigarettes to make them less  
44  
45 desirable is long overdue. Some recent research has examined consumer perceptions of  
46  
47 cigarettes that have been designed to be 'dissuasive', including unattractively coloured  
48  
49 cigarettes,<sup>15,16</sup> cigarettes with the warning 'Smoking kills' on the cigarette paper,<sup>17,18</sup> and  
50  
51 cigarettes displaying the 'minutes of life lost due to smoking' on the cigarette paper.<sup>19</sup> In each  
52  
53 of these studies the dissuasive cigarettes were generally viewed more negatively than regular  
54  
55  
56  
57  
58  
59  
60

1  
2  
3 cigarettes. For instance, a qualitative study with young women smokers in New Zealand  
4 found that unattractively coloured cigarettes, particularly green or brown coloured cigarettes,  
5 were perceived as more harmful than other cigarettes, with it less likely that they or others  
6 their age would want to use them.<sup>15</sup> An in-home survey in the UK with 11-16 year olds, who  
7 were shown an image of a cigarette stick displaying ‘Smoking kills’, found that 53%  
8 indicated that this would make people want to give up smoking, 71% indicated that it would  
9 put people off starting to smoke, and 85% supported having a warning on all cigarettes.<sup>18</sup>

10  
11  
12  
13  
14  
15  
16  
17  
18 In this study our objective was to explore, for the first time, young adult smokers’  
19 perceptions of pack inserts and dissuasive cigarettes (a cigarette displaying the warning  
20 ‘Smoking kills’ and a green coloured cigarette).  
21  
22  
23  
24  
25

## 26 **METHODS**

### 27 **Design and sample**

28  
29  
30  
31  
32 An online survey was conducted in January-February 2016 with smokers aged 16-34 years  
33 old in the UK; an online survey is a suitable approach given that 99% of this age group in the  
34 UK are recent internet users.<sup>20</sup> The sample (n=1970) was recruited by online market research  
35 company ‘Research Now’ from their panel of over 400,000 people ([www.researchnow.com](http://www.researchnow.com)).  
36  
37 After Research Now excluded those who had completed the survey in less than the minimum  
38 completion time (n=193), which they had set prior to data collection commencing, and those  
39 providing responses to open-ended questions that indicated that they had not taken the survey  
40 seriously (n=11), the final sample was 1766 (89.6% of completed surveys). The final sample  
41 was 50.3% male, with 53.9% aged 25-34 years and 71.6% white British. Most participants  
42 smoked 10 or less cigarettes per day, with 46.0% exclusive factory-made cigarette smokers  
43 (see Table 1 for sample and smoking-related characteristics).  
44  
45  
46  
47  
48  
49  
50  
51  
52  
53  
54  
55  
56  
57  
58  
59  
60



1  
2  
3  
4  
5 Table 1 here  
6  
7  
8

9 **Procedure**

10  
11 An email invite was sent by Research Now to their online panel in the UK. Research Now is  
12 an established online market research company in the UK and elsewhere,<sup>21</sup> with their panels  
13 recruited from a wide range of sources, such as internet sites, advertising and partnerships  
14 with other websites. Research Now, like other online panels, has details of their members'  
15 demographics and other characteristics that are used to profile target samples. Response rate  
16 details are not available when using this sampling methodology however as recording  
17 contact, participation and refusal rates is not practical.<sup>22</sup> For those that responded to the email  
18 invite, they answered screening questions about their age, smoking status and types of  
19 tobacco products used, with those that did not meet the inclusion criteria (factory-made  
20 cigarette smokers aged 16-34 years) excluded.  
21  
22  
23  
24  
25  
26  
27  
28  
29  
30  
31  
32

33 Those eligible for inclusion were presented with an information page explaining the  
34 study aim (to explore what young adult smokers thought about cigarettes and pack inserts),  
35 and relevant ethical information (their right to withdraw at any time, assurances of  
36 confidentiality and anonymity, and contact details if they had any concerns or would like to  
37 request a copy of the published findings). They were then presented with a consent page, with  
38 consent required for participation. Survey questions were presented in the same order for all  
39 participants, except the questions exploring perceptions of the three cigarette types (standard  
40 cigarette (SC), warning cigarette (WC), green cigarette (GC)), where the ordering was  
41 randomised; the ordering of the presentation of the three cigarettes (shown in Figure 1) was  
42 also randomised. There was no missing data as participants could only proceed to the next  
43 question if they had provided an answer to the previous question.  
44  
45  
46  
47  
48  
49  
50  
51  
52  
53  
54  
55  
56  
57  
58  
59  
60

1  
2  
3  
4  
5 Figure 1 here  
6  
7  
8

9 Prior to the questions on inserts, participants were shown an image of a cigarette pack with an  
10 insert shown in the front of the pack – as they typically appear in packs – alongside the text  
11 ‘We have some questions on pack inserts, which can sometimes be found inside packs (see  
12 image for example)’. For each question about inserts, participants were shown the question  
13 and an image of one insert. Four different inserts were used in total, as shown in Figure 2,  
14 with these chosen from the eight used in Canada as they were considered most relevant to our  
15 sample. The words ‘Health Canada’ were removed from the bottom of each insert to make  
16 them more relevant for participants in the UK. The median time for survey completion was 9  
17 minutes 28 seconds. Participants received a nominal incentive (50 pence) for participation, as  
18 is common for online panels. The study received ethical approval from the School of Health  
19 Sciences Ethics Committee at the University of Stirling.  
20  
21  
22  
23  
24  
25  
26  
27  
28  
29  
30  
31  
32  
33  
34

35 Figure 2 here  
36  
37  
38

### 39 **Patient and public involvement**

40 There was no patient or public involvement in the development, design or conduct of this  
41 study.  
42  
43  
44  
45  
46  
47

### 48 **Measures**

49  
50  
51  
52 *Inserts: Salience and information provision*  
53  
54  
55  
56  
57

1  
2  
3 Participants were asked ‘If this type of insert was in your cigarette pack, do you think that  
4 you would read it?’ and ‘If this type of insert was in your cigarette pack, do you think that  
5 you would read it if you were interested in quitting?’ They were also asked ‘Do you think  
6 that inserts would be a good way to provide information to smokers about quitting?’<sup>5</sup>  
7  
8  
9  
10  
11 Response options for each were ‘Yes’, ‘No’ and ‘Not sure’.  
12  
13

#### 14 15 16 *Inserts: Cessation*

17  
18 Three questions assessed to what extent participants agreed or disagreed that inserts would  
19 make them think about quitting, and help them quit: ‘Do you agree or disagree that having  
20 these types of inserts in every cigarette pack would make you think more about quitting?’,  
21  
22 ‘Do you agree or disagree that having these types of inserts in every cigarette pack might help  
23 you if you decided to quit?’, and ‘Do you agree or disagree that having these types of inserts  
24 inside every cigarette pack would be an effective way of helping smokers who want to quit?’<sup>6</sup>  
25  
26  
27  
28  
29  
30 Response options for each were ‘Strongly disagree’, ‘Disagree’, ‘Neither agree nor disagree’,  
31  
32 ‘Agree’, ‘Strongly agree’ and ‘Don’t know’.  
33  
34  
35  
36

#### 37 38 *Inserts: Support*

39  
40 A five-point semantic scale assessed support, with anchors ‘All cigarette packs should have  
41 inserts like this in them-No cigarette packs should have inserts like this in them’.  
42  
43  
44  
45

#### 46 47 *Cigarette design: Appeal, harm and trial*

48  
49 Seven-point semantic scales assessed appeal, harm and likely trial. Appeal was assessed via  
50 four scales, with anchors ‘Attractive-Unattractive’, ‘Stylish-Not stylish’, ‘Not nice to be seen  
51 with-Nice to be seen with’ and ‘Not appealing to people my age-Appealing to people my  
52 age’. Harm was assessed via two scales, with anchors ‘Looks harmful to health-Does not look  
53  
54  
55  
56  
57  
58  
59  
60

1  
2  
3 harmful to health' and 'Makes me think about the dangers of smoking-Does not make me  
4 think about the dangers of smoking'. Likely trial was assessed via two scales, 'If a friend  
5 offered you each of these cigarettes, how likely would you be to try them?' and 'If someone  
6 your age who had never smoked before was going to try a cigarette, how likely do you think  
7 they would be to try each of these cigarettes?' Both scales assessing trial ranged from 'Not at  
8 all likely' to 'Very likely'.

9  
10  
11  
12  
13  
14  
15  
16 A factor analysis of the eight variables on appeal, harm and trial, collated for the three  
17 cigarette types (SC, WC, GC), was undertaken. Checks indicated that the data was suitable  
18 for factor analysis (Kaiser Meyer Olkin=0.845, Bartlett's test of sphericity (approx. chi-  
19 square 18062.842, df=276, p<0.001), with no correlations between the variables >0.9). The  
20 extraction method used was Principal Axis Factoring and the criteria for extraction was  
21 eigenvalues>1. All eight variables loaded on a single factor with factor loadings that were  
22 >0.5. High factor scores indicated that a cigarette was desirable and low scores that it was  
23 undesirable. The factor was used as the outcome measure of cigarette desirability in the  
24 regression analysis. Visual inspection and the Kolmogorov-Smirnov test indicated that the  
25 factor was non-normal (because responses for the dissuasive cigarettes indicated they were  
26 undesirable generally) and attempts to normalise it using normit rankit methods failed.  
27 Therefore, the factor was divided into tertiles, with the tertile indicating undesirable factor  
28 scores compared with the other two tertiles. This was the outcome variable in logistic  
29 regression analysis.

### 30 31 32 33 34 35 36 37 38 39 40 41 42 43 44 45 46 47 48 *Sociodemographic characteristics*

49  
50 Age, gender, ethnicity, educational attainment and economic status (based on chief income  
51 earner) were obtained. Preliminary analysis showed that education was associated with how  
52 pack inserts were perceived, whereas both education and economic status were associated  
53  
54  
55  
56  
57  
58  
59  
60

1  
2  
3 with how cigarettes were perceived. As such, for the analysis of the cigarettes a count  
4  
5 procedure was used to create a variable for low socioeconomic status (SES): low education  
6  
7 (General Certificate of Secondary Education: GCSE or below) and/or low economic status  
8  
9 (routine or manual occupation, long-term unemployed or long-term sick or disabled).  
10

### 11 12 13 *Smoking behaviour*

14  
15 Smoking status was assessed with 'Which of these best describes you?' with response  
16  
17 options: 'I have never smoked', 'I used to smoke, but don't now', 'I smoke, but not every  
18  
19 day', and 'I smoke every day'. Type of products used was assessed with 'What type(s) of  
20  
21 tobacco products do you smoke?' with response options: 'Only factory-made (packet)  
22  
23 cigarettes', 'Factory-made and roll-your-own cigarettes', 'Factory-made cigarettes and other  
24  
25 tobacco products (e.g. cigars, shisha, etc)', 'Only roll-your-own cigarettes' and 'Only other  
26  
27 tobacco products (e.g. cigars, shisha, etc)'. The Heaviness of Smoking Index (HSI)<sup>23</sup> was  
28  
29 used as a measure of dependence, based on daily consumption and time to first cigarette.  
30  
31  
32  
33  
34

### 35 *Quitting and self-efficacy*

36  
37 Participants were asked 'Have you ever made an attempt to quit smoking that lasted at least  
38  
39 24 hours?'<sup>24</sup> (Yes within the last six months, Yes more than six months ago, I have never  
40  
41 tried to quit for more than 24 hours). They were also asked 'How likely are you to try to quit  
42  
43 smoking within the next six months?'<sup>25</sup> (Not at all, A little, Moderately, Very, Extremely,  
44  
45 Don't know), with those responding 'Not at all', 'A little', 'Moderately' or 'Don't know'  
46  
47 classified as 'Unlikely to make a quit attempt in the next six months'. To measure quitting  
48  
49 self-efficacy, participants were asked 'If you decided to quit smoking in the next six months,  
50  
51 how sure are you that you would succeed?'<sup>26</sup> (Not at all, A little, Moderately, Very,  
52  
53 Extremely, Don't know). Those who responded to the likelihood of quitting question with  
54  
55  
56  
57  
58  
59  
60

1  
2  
3 'Very or 'Extremely' and to the quitting efficacy question with 'Not at all', 'A little',  
4  
5 'Moderately' or 'Don't know' were classified as 'unlikely to make a successful quit attempt  
6  
7 in the next six months'. Those who responded 'Very' or 'Extremely' to both questions were  
8  
9 classified as 'likely to make a successful quit attempt in the next six months'.  
10

### 11 12 13 **Analysis**

14  
15 Data was analysed using Microsoft office Excel 2013, SPSS v22 and v23 and MLWin  
16  
17 v2.33.<sup>27</sup> The insert variables were dichotomised into yes/agreement and  
18  
19 no/disagreement/neutral/not sure/don't know. The dichotomised insert variables were the  
20  
21 outcomes of the logistic regression models. The independent variables were gender, age,  
22  
23 education, ethnicity, dependence (tertiles of HSI), tobacco product(s) smoked, previous quit  
24  
25 attempt lasting at least 24 hours, and likely efficacy of a quit attempt in the next six months.  
26  
27 Percentages in agreement were calculated. Age, gender and education (as a measure of SES)  
28  
29 were entered into all models to account for any sampling inadequacies. Other variables were  
30  
31 entered where  $p < 0.10$  in chi square tests. The models were assessed for multicollinearity via  
32  
33 comparison of standard errors<sup>28</sup> and none was found.  
34  
35  
36

37  
38 For each of the eight seven-point semantic scales, the percentage of participants  
39  
40 choosing one of the three points nearest the undesirable anchor (e.g. unattractive, not nice to  
41  
42 be seen with, looks harmful to health) was calculated for each of the three cigarette types  
43  
44 (SC, WC, GC). Thus, 24 percentages were calculated. Differences between the three  
45  
46 cigarettes were tested using Cochran's Q and pairwise comparisons.  
47

48  
49 Multilevel logistic regression modelling of cigarette desirability, with second order  
50  
51 PQL estimation,<sup>29</sup> was undertaken with cigarette evaluations (participants' response to each  
52  
53 of the three cigarettes) clustered within individual participants. Therefore, cigarette  
54  
55 evaluations were level one cases and participants were entered at level two as a random  
56  
57

1  
2  
3 effect. All models included cigarette type as a fixed effect, where the standard cigarette was  
4 compared with the warning cigarette and green cigarette. Other fixed effects at the individual  
5 (participant) level were sociodemographic and smoking-related characteristics, which were  
6 significantly associated with the outcome in multivariable models. This main effects model  
7 tested which characteristics were associated with perceiving cigarettes as desirable. In order  
8 to understand which characteristics differentiated the desirability of the three types of  
9 cigarettes, interactions between cigarette type and each significant characteristic were tested.  
10 Only one interaction was found, between cigarette type and SES. The interacting variables  
11 (cigarette type and SES) were substituted by a cross classified variable which merged  
12 cigarette type and SES. This cross classified variable was split into six categories: low SES  
13 standard cigarette, low SES warning cigarette, low SES green cigarette, not low SES standard  
14 cigarette, not low SES warning cigarette, not low SES green cigarette. To understand the  
15 interaction five models were run with the reference category of the cross classified variable  
16 different each time.<sup>30,31</sup>

## 35 RESULTS

### 39 Perceptions of inserts

40 Half the sample indicated that they would read inserts, with approximately three-fifths  
41 indicating that they would read them if interested in quitting (60%), and that they would be a  
42 good way to provide information about quitting (61%). Just over half strongly agreed/agreed  
43 that inserts may make them think more about quitting (53%), help them if they decided to  
44 quit (52%), that they are an effective way of encouraging smokers to quit (53%), and that all  
45 cigarette packs should have inserts (55%), see Table 2.

1  
2  
3 Table 2 here  
4  
5  
6

### 7 **Sociodemographic differences in perceptions of inserts**

8  
9 Women were more likely than men to indicate that they would read inserts (aOR=1.24;  
10 95%CI 1.02-1.50), and 25-34 year olds less likely than 16-19 year olds to think that they  
11 were a good way of providing information about quitting (aOR=0.76; 95%CI 0.60-0.98).  
12  
13 Compared with white British participants, white non-British (aOR=0.70; 95%CI 0.50-0.98)  
14 and Asian (aOR=0.67; 95%CI 0.49-0.92) participants were less likely to suggest that they  
15 would read inserts if trying to quit, white non-British (aOR=0.58; 95%CI 0.41-0.81) and  
16 Black (aOR=0.61; 95%CI 0.38-0.98) participants were less likely to indicate that inserts  
17 would make them think about quitting, and white non-British (aOR=0.62; 95%CI 0.44-0.87)  
18 and Asian (aOR=0.70; 95%CI 0.51-0.96) participants were less likely to support having  
19 inserts in all packs, see Table 3.  
20  
21  
22  
23  
24  
25  
26  
27  
28  
29  
30  
31  
32

### 33 **Smoking-related differences**

34  
35 Compared to exclusive factory-made cigarette smokers, those who also smoked roll-your-  
36 own cigarettes were more likely to indicate they would read inserts (aOR=1.35; 95%CI 1.09-  
37 1.66), read them if trying to quit (aOR=1.61; 95%CI 1.30-2.00), that they would make them  
38 think about quitting (aOR=1.31; 95%CI 1.06-1.62), help them if they decided to quit  
39 (aOR=1.31; 95%CI 1.06-1.61), and that they would be an effective way of encouraging  
40 smokers to quit (aOR=1.27; 95%CI 1.03-1.56), see Table 3. Compared to exclusive factory-  
41 made cigarette smokers, those who also smoked other tobacco products (e.g. cigars, shisha)  
42 were more likely to indicate they would read inserts if trying to quit (aOR=1.39; 95%CI 1.04-  
43 1.86) and that inserts might help them if they decided to quit (aOR=1.34; 95%CI 1.01-1.78).  
44  
45  
46  
47  
48  
49  
50  
51  
52  
53  
54  
55  
56  
57  
58  
59  
60



1  
2  
3 Participants who had made a quit attempt more than six months ago (aOR=1.30;  
4 95%CI 1.00-1.69), or within the last six months (aOR=1.67; 95%CI 1.29-2.15), were more  
5 likely to indicate that they would read inserts than those who had never made a quit attempt.  
6  
7 Those who had made a quit attempt in the last six months were also more likely than those  
8 who had never made a quit attempt to indicate that inserts were a good way to provide  
9 information about quitting (aOR=1.54; 95%CI 1.20-1.98), that they would read them if trying  
10 to quit (aOR=1.51; 95%CI 1.17-1.94), make them think about quitting (aOR=1.46; 95%CI  
11 1.14-1.88), help them if they decided to quit (aOR=1.35; 95%CI 1.05-1.73), and that they  
12 would be an effective way of encouraging smokers to quit (aOR=1.33; 95%CI 1.04-1.71).  
13  
14  
15  
16  
17  
18  
19  
20  
21

22 Compared to those likely to make a successful quit attempt in the next six months,  
23 those unlikely to make a quit attempt in the next six months were less likely to indicate that  
24 they would read inserts (aOR=0.58; 95%CI 0.44-0.75), read them if trying to quit  
25 (aOR=0.74; 95%CI 0.55-0.99), that they would make them think about quitting (aOR 0.59;  
26 95%CI 0.45-0.78), help them if they decided to quit (aOR=0.51; 95%CI 0.38-0.67), that they  
27 would be effective for smokers if they decided to quit (aOR=0.55; 95%CI 0.41-0.73), or  
28 support them (aOR=0.56; 95%CI 0.42-0.74). Compared to those likely to make a successful  
29 quit attempt in the next six months, those unlikely to make a successful quit attempt in the  
30 next six months were more likely to read inserts if trying to quit (aOR=1.43; 95%CI 1.00-  
31 2.06), thought that they were a good way to provide information to smokers about quitting  
32 (aOR=1.46; 95%CI 1.02-2.08), and support them (aOR=1.43; 95%CI 1.00-2.04).  
33  
34  
35  
36  
37  
38  
39  
40  
41  
42  
43  
44  
45  
46  
47

48 Table 3 here  
49  
50  
51

### 52 **Perceptions of cigarette design**

53  
54 With respect to harm, participants were less likely to think that the standard cigarette (SC)  
55  
56  
57

1  
2  
3 looked harmful than the warning cigarette (WC) or green cigarette (GC) ( $p<0.001$ ), and less  
4  
5 likely to think that the SC made them think more about the dangers of smoking than the WC  
6  
7 or GC ( $p<0.001$ ), see Table 4. Participants were also less likely to indicate that the GC would  
8  
9 make them think of the dangers of smoking than the WC ( $p=0.01$ ). In terms of appeal,  
10  
11 participants were more likely to consider the SC attractive, and stylish, than the WC or GC  
12  
13 (both  $p<0.001$ ). The SC was also considered to be nicer to be seen with, and more appealing  
14  
15 to people their age, than the WC or GC (both  $p<0.001$ ). In terms of trial, whereas only 8.9%  
16  
17 indicated that they would be unlikely to try a SC if offered by a friend, this was 45.4% for the  
18  
19 WC and 66.5% for the GC (both  $p<0.001$ ). Similarly, while only 14.8% indicated that a never  
20  
21 smoker their age would be unlikely to try a SC, this was 63.3% for the WC and 71.6% for the  
22  
23 GC (both  $p<0.001$ ), see Table 4.  
24  
25  
26  
27  
28

29 Table 4 here  
30  
31  
32

### 33 **Perceptions of cigarette desirability**

34  
35 Main effects multivariable logistic regression modelling suggested that in comparison to the  
36  
37 SC, the WC (aOR=17.71; 95%CI 13.75-22.80) and GC (aOR=30.88; 95%CI 23.98-39.76)  
38  
39 were much more likely to be perceived as undesirable (i.e. less appealing, more harmful, less  
40  
41 likely to be tried). The model also indicated which smokers were more likely to rate the  
42  
43 cigarettes as undesirable: women were more likely than men (aOR=1.30; 95%CI 1.10-1.54),  
44  
45 and low SES more likely than those not low SES (aOR=1.26; 95%CI 1.06-1.50), to consider  
46  
47 all three cigarettes undesirable. Compared to exclusive factory-made cigarette smokers, those  
48  
49 who also smoked roll-your-own cigarettes (aOR=0.78; 95%CI 0.65-0.93) or other tobacco  
50  
51 products (aOR=0.73; 95%CI 0.56-0.93) were less likely to consider all three cigarettes  
52  
53  
54  
55 undesirable. Those not likely to make a quit attempt in the next six months were less likely  
56  
57  
58  
59  
60

1  
2  
3 than those likely to make a quit attempt in the next six months (aOR=0.62; 95%CI 0.49-0.78)  
4  
5 to consider all three cigarettes undesirable.

6  
7 Only one significant interaction, between cigarette type and SES, was found ( $p < 0.05$ ).  
8  
9 Both SES groups perceived the WC significantly more undesirable than the SC, and the GC  
10 significantly more undesirable than the WC (see Table 5). Low SES participants were  
11 significantly more likely than those not low SES to perceive the SC (aOR=1.89; 95%CI 1.18-  
12 3.03) and GC (aOR=1.43; 95%CI 1.13-1.80) as undesirable; there was no difference for the  
13 WC (aOR=0.99; 95%CI 0.78-1.25).  
14  
15  
16  
17  
18  
19  
20  
21

22 Table 5 here  
23  
24  
25

## 26 **DISCUSSION**

27  
28 Our findings suggest that inserts highlighting the benefits of quitting or providing tips on how  
29 to do so may have the potential to encourage cessation, and dissuasive cigarettes may help to  
30 reduce the desirability of smoking. Just as tobacco companies have used inserts and cigarette  
31 design to create interest in their products, our study suggests that greater attention to how  
32 these could be used to promote cessation appears warranted.  
33  
34  
35  
36  
37  
38

39 Health messages need to capture attention to be effective.<sup>32</sup> In this regard, at least half  
40 our sample indicated that they would read inserts (50%) and read them if interested in  
41 quitting (60%). In Canada, an observational study found that approximately a quarter of  
42 smokers reported reading them at least once within the last month,<sup>10</sup> increasing to about one-  
43 third of smokers over two years of follow-up.<sup>11</sup> Like the smokers in our study who indicated  
44 that they would read the inserts, smokers in Canada who had read the inserts were more  
45 likely to be female, intend to quit or had recently tried to quit; in our study, they were also  
46 more likely to be white British, have moderate dependence, and use factory-made cigarettes  
47  
48  
49  
50  
51  
52  
53  
54  
55  
56  
57

1  
2  
3 and other tobacco products. Future research could explore why dual users (smokers of  
4 factory-made cigarettes and other tobacco products) were more likely to indicate that they  
5 would read inserts, but as inserts are typically only found in cigarette packs then for those  
6 who use other tobacco products they may be seen as more of a novelty and therefore more  
7 likely to capture attention.  
8  
9  
10  
11  
12

13           Approximately three-fifths (61%) of smokers in our study thought that inserts were a  
14 good way to provide information about quitting to smokers, with only 25% disagreeing. In  
15 comparison, an earlier study in Canada, commissioned by Health Canada, found that 48% of  
16 smokers indicated that messaging on inserts was a good way to provide information to  
17 smokers, with 47% disagreeing.<sup>5</sup> Just over half our sample agreed/strongly agreed that inserts  
18 may make them think more about quitting, help them if they decided to quit, and that they are  
19 an effective way of encouraging smokers to quit, whereas in New Zealand only 34% of  
20 smokers and recent quitters agreed/strongly agreed that inserts would be an effective way of  
21 encouraging reduced consumption or quitting.<sup>6</sup> There may be various reasons for the  
22 differences between our findings and earlier research. For instance, when this earlier research  
23 was conducted cigarette packs displayed text-only health warnings and it may be that having  
24 pictorial warnings on packs, as is required in Scotland, may prompt smokers to look for  
25 information on how to quit and the benefits of doing so. Insert design is also likely to be  
26 relevant. Whereas the inserts used in earlier research were limited to text, the inserts used in  
27 this study (which have been used in Canada since 2012) included coloured graphics, which is  
28 typical of promotional inserts used by tobacco companies and likely enhanced their impact.  
29 This would be consistent with the health communications and warnings literature, which  
30 demonstrates the importance of supporting text with pictorials.<sup>32,33</sup> Future research exploring  
31 insert design (e.g. use of imagery, inclusion of cessation resource information, length and  
32 framing of messages, etc) would be of value.  
33  
34  
35  
36  
37  
38  
39  
40  
41  
42  
43  
44  
45  
46  
47  
48  
49  
50  
51  
52  
53  
54  
55  
56  
57  
58  
59  
60

1  
2  
3 More than half our sample supported the inclusion of inserts promoting cessation  
4 inside every cigarette pack, with only a fifth opposing this. Within the European Union, the  
5 Tobacco Products Directive (TPD)<sup>34</sup> does not require tobacco companies to include health  
6 communication inserts in packs, but allows member states to introduce measures beyond  
7 those specified. Among governmental representatives that responded to the consultation on  
8 the revision of the TPD there was strong support for improving consumer information via  
9 mandatory pictorial warnings, with those supportive arguing that additional information, such  
10 as pack inserts, would help to deliver more accurate health information.<sup>35</sup> If there is support  
11 for inserts among governmental representatives, and little opposition among smokers (the  
12 group most likely to be resistant), they are clearly a viable option for regulators.  
13  
14  
15  
16  
17  
18  
19  
20  
21  
22  
23

24 Tobacco industry journals describe the cigarette as an increasingly important  
25 advertising medium for tobacco companies.<sup>12</sup> However, until recently, the public health focus  
26 has been on the potential of regulating the contents of cigarettes to reduce palatability or  
27 addictiveness,<sup>36</sup> with little consideration of the possibility of regulating the appearance of  
28 cigarettes to reduce its importance as a promotional tool. We found that the two dissuasive  
29 cigarettes were perceived as significantly more harmful and less appealing than the standard  
30 cigarette, and less likely to encourage trial. The harm, appeal and trial items loaded onto a  
31 single 'desirability' factor, with the dissuasive cigarettes considered much more undesirable  
32 than the standard cigarette. The findings are consistent with earlier research, where cigarettes  
33 with the warning 'Smoking kills' were considered a constant reminder of the associated  
34 harms and, partly due to the perceived discomfort of being observed by others smoking a  
35 cigarette displaying this message, unappealing for smokers.<sup>8,16,17,18</sup> Previous studies have also  
36 found unattractively coloured cigarettes to be perceived as more harmful than other cigarettes  
37 and also repellent, being a cigarette that young people did not think that others their age  
38 would use.<sup>15,16,37,38</sup> As with the inserts, the dissuasive cigarettes (and also the standard  
39  
40  
41  
42  
43  
44  
45  
46  
47  
48  
49  
50  
51  
52  
53  
54  
55  
56  
57  
58  
59  
60

1  
2  
3 cigarette) were considered more desirable among dual users than exclusive factory-made  
4  
5 cigarette smokers; again it is not clear why this was the case but further research with dual  
6  
7 users, or indeed those also using vaping devices (not assessed in this study), would be  
8  
9 fruitful.

10  
11 In terms of limitations, the cross-sectional design did not allow us to assess causality;  
12  
13 that inserts and dissuasive cigarettes are not available on the UK market prevents more robust  
14  
15 study designs such as longitudinal studies. Another potential limitation concerns the novelty  
16  
17 of the stimuli, which may have influenced responses, and forced exposure to the stimuli. In  
18  
19 addition, we only used four inserts, rather than the full set of eight used in Canada, which  
20  
21 includes inserts less relevant to our sample. While online surveys have been used for previous  
22  
23 research exploring cigarette packaging, inserts and dissuasive cigarettes,<sup>39-42</sup> and are a  
24  
25 suitable survey mode for young adults, the use of an online panel and self-selection limits the  
26  
27 representativeness of our sample. In addition, the use of semantic differential scales can be  
28  
29 criticised because answers can be subject to various response biases, although we attempted  
30  
31 to diminish these through varying scale item direction and through our multivariate modelling  
32  
33 methodology.

34  
35  
36  
37 It was argued, over two decades ago, that to offer greater protection to consumers  
38  
39 cigarettes should come in plain packs with health messaging on both the pack exterior and  
40  
41 interior.<sup>43</sup> This idea is a step closer in the UK, although there will still be no messaging on the  
42  
43 pack interior. That more than half of the participants in this study suggested that inserts may  
44  
45 help to promote cessation suggests that their inclusion in packs may be a meaningful  
46  
47 supplement to the on-pack warnings. Our findings suggest however that to offer the greatest  
48  
49 protection to consumers, it may be beneficial to supplement plain packaging and inserts with  
50  
51 cigarettes designed to be dissuasive. Unattractively coloured cigarettes would complement  
52  
53  
54  
55  
56  
57  
58  
59  
60

1  
2  
3 the unattractively coloured packs, just as warnings on the cigarette would extend the  
4  
5 warnings on the cigarette pack. Both options are clearly viable.  
6  
7

8  
9 **Contributors** CM designed the data collection tool and drafted and revised the paper. RH  
10  
11 analysed the data and drafted the Analysis and Results. JT and GR helped design the data  
12  
13 collection tool and commented on the paper. All authors read and approved the final  
14  
15 manuscript.  
16

17  
18 **Funding** This work was supported by Health Scotland. GR, who works for Health Scotland,  
19  
20 provided feedback on the survey and paper, but was not involved in the collection, analysis  
21  
22 and interpretation of the data.  
23

24 **Competing interests** GR works for Health Scotland, who funded this study.  
25

26 **Ethics approval** The study obtained ethics approval from the School of Health Sciences  
27  
28 Ethics Committee at the University of Stirling. Participants provided informed consent before  
29  
30 participating.  
31

32  
33 **Provenance and peer review** Not commissioned; externally peer reviewed.  
34

35 **Data sharing statement** No additional data are available.  
36  
37

#### 38 39 **Figure Legends:** 40

41  
42 Figure 1: Standard cigarette, warning cigarette and green cigarette  
43

44 Figure 2: Pack inserts highlighting the benefits of quitting or providing tips on how to do so  
45  
46  
47  
48  
49  
50  
51  
52  
53  
54  
55  
56  
57  
58  
59  
60

## REFERENCES

1. Canadian Cancer Society. *Cigarette package health warnings. International status report (Fifth edition)*; 2016. [www.tobaccolabels.ca/wp/wp-content/uploads/2016/11/Cigarette-Package-Health-Warnings-International-Status-Report-English-CCS-Oct-2016.pdf](http://www.tobaccolabels.ca/wp/wp-content/uploads/2016/11/Cigarette-Package-Health-Warnings-International-Status-Report-English-CCS-Oct-2016.pdf) (accessed 10 Sept 2017).
2. Hammond D. Health warning messages on tobacco products: a review. *Tob Control* 2011;20:327–37.
3. Mahood G. *Canada's tobacco package label or warning system: "telling the truth" about tobacco product risks*. Geneva: WHO; 2010.
4. Tandemar Research Inc. *Tobacco health warning messages, inserts and toxic constituents information study - Final Report*. Toronto: Tandemar Research Inc, 1992.
5. Environics. *Health warning messages on the flip/side and inserts of cigarette packaging. A survey of smokers. A report prepared for Health Canada*; 2000.
6. BRC Marketing and Social Research. *Smoking health warnings study*. Wellington: Ministry of Health; 2004. [www.tobaccolabels.ca/wp/wp-content/uploads/2013/12/NZ-2004-Effectiveness-of-Different-Health-Warnings-in-Helping-People-Consider-Their-Smoking-Related-Behaviour-Government-Report.pdf](http://www.tobaccolabels.ca/wp/wp-content/uploads/2013/12/NZ-2004-Effectiveness-of-Different-Health-Warnings-in-Helping-People-Consider-Their-Smoking-Related-Behaviour-Government-Report.pdf) (accessed 12 Aug 2017).
7. Gallopel-Morvan K, Moodie C, Hammond D, *et al*. Consumer understanding of cigarette emission labelling. *Eur J Pub Health* 2011;21:373-5.
8. Moodie C. Novel ways of using tobacco packaging to communicate health messages: Interviews with packaging and marketing experts. *Addict Res Theory* 2016;24:54-61.



- 1  
2  
3 9. Moodie C. Adult smokers' perceptions of cigarette pack inserts promoting cessation:  
4 A focus group study. *Tob Control* 2018;27:72-7.  
5  
6
- 7 10. Thrasher JT, Osman A, Abad EN, *et al*. The innovative use of cigarette package  
8 inserts to supplement pictorial health warnings: An evaluation of the Canadian policy.  
9  
10  
11  
12 *Nicot Tob Res* 2015;17:870-5.
- 13 11. Thrasher JF, Swayampakala K, Cummings KM, *et al*. Cigarette package inserts can  
14 promote efficacy beliefs and sustained smoking cessation attempts: A longitudinal  
15 assessment of an innovative policy in Canada. *Prev Med* 2016;88:59-65.  
16  
17  
18
- 19 12. Rossell S. Ready to roll. *Tob Report* 2017;2:44-5.  
20  
21
- 22 13. Smith KC, Washington C, Welding K, *et al*. Cigarette stick as valuable  
23 communicative real estate: a content analysis of cigarettes from 14 low-income and  
24 middle-income countries. *Tob Control* 2017;26:604-7.  
25  
26  
27
- 28 14. Hedley D. Tobacco wars: A new hope - the changing future. *Tob J Int* 2015;3:31-4.  
29
- 30 15. Hoek J, Robertson C. How do young adult female smokers interpret dissuasive  
31 cigarettes? *J Social Marketing* 2015;5:21-39.  
32  
33  
34
- 35 16. Hoek J, Gendall P, Eckert C, *et al*. Dissuasive cigarette sticks: the next step in  
36 standardised ('plain') packaging? *Tob Control* 2016;15:699-705.  
37  
38
- 39 17. Moodie C, Purves R, McKell J, *et al*. Novel means of using cigarette packaging and  
40 cigarettes to communicate health risk and cessation messages: A qualitative study.  
41  
42  
43  
44 *Internat J Mental Health Addiction* 2015;13:333-44.
- 45 18. Moodie C, Mackintosh AM, Gallopel-Morvan K, *et al*. Adolescents' perceptions of  
46 health warnings on cigarettes. *Nicot Tob Res* 2017;29:1232-7.  
47  
48  
49
- 50 19. Hassan L, Shui E. No place to hide: two pilot studies assessing the effectiveness of  
51 adding a health warning to the cigarette cigarette. *Tob Control* 2015;24:e3-5.  
52  
53  
54  
55  
56  
57

- 1  
2  
3 20. ONS. *Internet users in the UK: 2017*.  
4  
5 [www.ons.gov.uk/businessindustryandtrade/itandinternetindustry/bulletins/internetuser](http://www.ons.gov.uk/businessindustryandtrade/itandinternetindustry/bulletins/internetusers/2017)  
6  
7 [s/2017](http://www.ons.gov.uk/businessindustryandtrade/itandinternetindustry/bulletins/internetusers/2017) (accessed 15 Sept 2017).  
8  
9 21. Hoek J, Gendall P, Eckert C, *et al*. Effects of brand variants on smokers' choice  
10 behaviours and risk perceptions. *Tob Control* 2016;25:160-5.  
11  
12 22. Moodie C, Sinclair L, Mackintosh AM, *et al*. How tobacco companies are perceived  
13 within the UK: An online panel. *Nicot Tob Res* 2016;18:1766-72.  
14  
15 23. Kozlowski LT, Porter CQ, Orleans T, *et al*. Predicting smoking cessation with self-  
16 reported measures of nicotine dependence: FTQ, FTND, and HSI. *Drug Alcohol*  
17 *Depend* 1994;34:211-6.  
18  
19 24. Etter JF, Sutton S. Assessing 'stage of change' in current and former smokers Trying  
20 to stop smoking: effects of perceived addiction, attributions for failure, and  
21 expectancy of success. *Addiction* 2002;97:1171-82.  
22  
23 25. Hammond D, Fong GT, McDonald PW, *et al*. Impact of the graphic Canadian  
24 warning labels on adult smoking behaviour. *Tob Control* 2003;12:391-5.  
25  
26 26. IARC. *IARC Handbooks of Cancer Prevention, Tobacco Control, Vol. 12: Methods*  
27 *for Evaluating Tobacco Control Policies*. Lyon, France: International Agency for  
28 Research on Cancer; 2008.  
29  
30 27. Rasbash J, Browne W, Healy M, *et al*. *A user's guide to MLwiN, version 2.3*. Bristol:  
31 Centre for multilevel modelling, University of Bristol; 2015.  
32  
33 28. Salmond C. *Fitting complex models using health survey data*; 2006.  
34  
35 [www.otago.ac.nz/wellington/otago020178.pdf](http://www.otago.ac.nz/wellington/otago020178.pdf) (accessed 15 Sept 2017).  
36  
37 29. Goldstein H, Rasbash J. Improved approximations for multilevel models with binary  
38 responses. *J Royal Statistical Society. Series A (Statistics in Society)* 1996;159:505-  
39  
40  
41  
42  
43  
44  
45  
46  
47  
48  
49  
50  
51  
52  
53  
54  
55  
56  
57  
58  
59  
60

- 1  
2  
3 30. Blakely T, Woodward A, Salmond C. Anonymous linkage of New Zealand mortality  
4 and Census data. *Australian NZ J Pub Health* 2000;24:92-5.  
5  
6  
7 31. Hiscock R, Murray S, Brose LS, *et al.* Behavioural therapy for smoking cessation:  
8 The effectiveness of different intervention types for disadvantaged and affluent  
9 smokers. *Addict Behav* 2013;38:2787-96.  
10  
11  
12  
13 32. Wogalter MS, Conzola VC, Smith-Jackson TL. Research-based guidelines for  
14 warning design and evaluation. *Applied Ergonomics* 2002;33:219-30.  
15  
16  
17 33. Houts PD, Doak CC, Doak LG, *et al.* The role of pictures in improving health  
18 communication: A review of research on attention, comprehension, recall, and  
19 adherence. *Patient Educ Couns* 2006;61:173-90.  
20  
21  
22  
23 34. European Commission. Directive 2014/40/EU of the European parliament and of the  
24 Council of 3 April 2014 on the approximation of the laws, regulations and  
25 administrative provisions of the Member States concerning the manufacture,  
26 presentation and sale of tobacco and related products and repealing Directive  
27 2001/37/EC. *Official Journal of the European Union* 2014;L127:1-38.  
28  
29  
30  
31 35. European Commission. *Report on the public consultation on the possible revision of*  
32 *the Tobacco Products Directive (2001/37/EC). Health and Consumers Directorate-*  
33 *General – Directorate D – Health systems and products D4 – Substances of human*  
34 *origin and tobacco control.* 2011.  
35  
36 [http://ec.europa.eu/health/tobacco/docs/consultation\\_report\\_en.pdf](http://ec.europa.eu/health/tobacco/docs/consultation_report_en.pdf) (accessed 10 Sept  
37 2017).  
38  
39  
40  
41  
42  
43  
44  
45  
46  
47  
48 36. Warner K. The national and international regulatory environment in tobacco control.  
49 *Pub Health Res Practice* 2015;25:e2531527.  
50  
51  
52  
53 37. Ford A, Moodie C, Mackintosh AM, *et al.* Adolescent perceptions of cigarette  
54 appearance. *Eur J Pub Health* 2014;24:464-8.  
55  
56  
57  
58  
59  
60

- 1  
2  
3 38. Moodie C, Ford A, Mackintosh AM, *et al.* Are all cigarettes just the same? Female's  
4 perceptions of slim, coloured, aromatised and capsule cigarettes. *Health Educ Res*  
5 2015;30:1-12.  
6  
7  
8  
9 39. Doxey J, Hammond D. Deadly in pink: The impact of female-oriented cigarette  
10 packaging among young women. *Tob Control* 2011;20:353-60.  
11  
12  
13 40. White CM, Hammond D, Thrasher JF, *et al.* The potential impact of plain packaging  
14 of cigarette products among Brazilian young women: an experimental study. *BMC*  
15 *Public Health* 2012;12:737.  
16  
17  
18  
19 41. Kotnowski K, Fong GT, Gallopel-Morvan K, *et al.* The impact of cigarette packaging  
20 design among young females in Canada: findings from a discrete choice experiment.  
21 *Nicot Tob Res* 2016;18:1348-56.  
22  
23  
24  
25  
26 42. Hoek J, Gendall P, Maubach N, *et al.* Strong public support for plain packaging of  
27 tobacco products. *Austr N Z J Pub Health* 2012;36:405-7.  
28  
29  
30  
31 43. Mahood G. Canada tobacco package warning system. *Tob Control* 1995;4:10-4.  
32  
33  
34  
35  
36  
37  
38  
39  
40  
41  
42  
43  
44  
45  
46  
47  
48  
49  
50  
51  
52  
53  
54  
55  
56  
57  
58  
59  
60

**Table 1:** Sample and smoking-related characteristics

| <i>Characteristic</i>                                            | <i>N</i> | <i>%</i> |
|------------------------------------------------------------------|----------|----------|
| Total                                                            | 1766     | 100.0    |
| <b>Age group</b>                                                 |          |          |
| 16-19                                                            | 413      | 23.4     |
| 20-24                                                            | 401      | 22.7     |
| 25-34                                                            | 952      | 53.9     |
| <b>Gender</b>                                                    |          |          |
| Male                                                             | 888      | 50.3     |
| Female                                                           | 878      | 49.7     |
| <b>Educational qualifications</b>                                |          |          |
| Other qualifications                                             | 1357     | 76.8     |
| None or GCSE                                                     | 409      | 23.2     |
| <b>Economic status</b>                                           |          |          |
| Other status                                                     | 1350     | 76.4     |
| Routine or manual occupation, unemployed or long term sick       | 416      | 23.6     |
| <b>Socioeconomic status (SES)</b>                                |          |          |
| No indicators of low SES                                         | 1114     | 63.1     |
| Low education and/or low SES                                     | 652      | 36.9     |
| <b>Ethnicity</b>                                                 |          |          |
| White British                                                    | 1264     | 71.6     |
| White non-British                                                | 162      | 9.2      |
| Black (including mixed black and white)                          | 79       | 4.5      |
| Asian (including mixed Asian and white)                          | 196      | 11.1     |
| Other or not declared                                            | 65       | 3.7      |
| <b>Location</b>                                                  |          |          |
| England                                                          | 1550     | 87.8     |
| Scotland                                                         | 109      | 6.2      |
| Wales                                                            | 73       | 4.1      |
| Northern Ireland                                                 | 34       | 1.9      |
| <b>Tobacco products used</b>                                     |          |          |
| Only factory-made (packet) cigarettes                            | 813      | 46.0     |
| Factory-made and roll-your-own cigarettes                        | 681      | 38.6     |
| Factory-made cigarettes and other products (e.g. cigars, shisha) | 272      | 15.4     |
| <b>Cigarettes per day</b>                                        |          |          |
| 10 or less                                                       | 1272     | 72.0     |
| 11-20                                                            | 433      | 24.5     |
| 21-30                                                            | 46       | 2.6      |
| 31 or more                                                       | 15       | 0.8      |
| <b>Time to first cigarette</b>                                   |          |          |
| Within 5 minutes                                                 | 263      | 14.9     |
| 6 to 30 minutes                                                  | 570      | 32.3     |

| <i>Characteristic</i>                                                                                                                            | <i>N</i> | <i>%</i> |
|--------------------------------------------------------------------------------------------------------------------------------------------------|----------|----------|
| 31 to 60 minutes                                                                                                                                 | 315      | 17.8     |
| After 60 minutes                                                                                                                                 | 618      | 35.0     |
| <b>Heaviness of Smoking Index (HSI)</b>                                                                                                          |          |          |
| 0 little dependence                                                                                                                              | 601      | 34.0     |
| 1                                                                                                                                                | 257      | 14.6     |
| 2                                                                                                                                                | 418      | 23.7     |
| 3                                                                                                                                                | 293      | 16.6     |
| 4                                                                                                                                                | 156      | 8.8      |
| 5                                                                                                                                                | 28       | 1.6      |
| 6 high dependence                                                                                                                                | 13       | 0.7      |
| <b>Dependence (Tertiles of HSI)</b>                                                                                                              |          |          |
| Low-dependence                                                                                                                                   | 601      | 34.0     |
| Mid-dependence                                                                                                                                   | 675      | 38.2     |
| High-dependence                                                                                                                                  | 490      | 27.7     |
| <b>Made an attempt to quit smoking that lasted at least 24 hours?</b>                                                                            |          |          |
| Yes, within the last six months                                                                                                                  | 788      | 44.6     |
| Yes, more than six months ago                                                                                                                    | 552      | 31.3     |
| No, I have never tried to quit smoking for more than 24 hours                                                                                    | 426      | 24.1     |
| <b>How likely are you to try to quit smoking within the next six months?</b>                                                                     |          |          |
| Not at all                                                                                                                                       | 198      | 11.2     |
| A little                                                                                                                                         | 382      | 21.6     |
| Moderately                                                                                                                                       | 508      | 28.8     |
| Very                                                                                                                                             | 308      | 17.4     |
| Extremely                                                                                                                                        | 272      | 15.4     |
| Don't know                                                                                                                                       | 98       | 5.5      |
| <b>If you decided to quit smoking in the next six months, how sure are you that you would succeed?</b>                                           |          |          |
| Not at all                                                                                                                                       | 147      | 8.3      |
| A little                                                                                                                                         | 346      | 19.6     |
| Moderately                                                                                                                                       | 612      | 34.7     |
| Very                                                                                                                                             | 297      | 16.8     |
| Extremely                                                                                                                                        | 241      | 13.6     |
| Don't know                                                                                                                                       | 123      | 7.0      |
| <b>Quit approach</b>                                                                                                                             |          |          |
| Moderately or less likely to make quit attempt in next six months (unlikely to make a quit attempt in the next six months)                       | 1186     | 67.2     |
| Very or extremely likely to attempt but moderately or less likely to succeed (unlikely to make a successful quit attempt in the next six months) | 304      | 17.2     |
| Very or extremely likely to attempt and very or extremely likely to succeed (likely to make a successful quit attempt in the next six months)    | 276      | 15.6     |

**Table 2:** Perceptions of whether inserts would be read, are a good way to provide information, whether they would help smokers to think about quitting or quit, and support for them

|                                                       | <b>Yes</b> | <b>No</b> | <b>Not sure</b> |
|-------------------------------------------------------|------------|-----------|-----------------|
|                                                       | <b>%</b>   | <b>%</b>  | <b>%</b>        |
| <b>Would they be read</b>                             | 50         | 37        | 13              |
| <b>Would they be read if interested in quitting</b>   | 60         | 25        | 15              |
| <b>Good way to provide information about quitting</b> | 61         | 25        | 14              |

  

|                                                     | <b>Agree</b> | <b>Disagree</b> | <b>Neither / Don't know</b> |
|-----------------------------------------------------|--------------|-----------------|-----------------------------|
|                                                     | <b>%</b>     | <b>%</b>        | <b>%</b>                    |
| <b>Make you think more about quitting</b>           | 53           | 18              | 29                          |
| <b>Might help you if you decided to quit</b>        | 52           | 19              | 29                          |
| <b>Effective way of encouraging smokers to quit</b> | 53           | 17              | 30                          |
| <b>All packs should have inserts</b>                | 55           | 20              | 25                          |

**Table 3:** Logistic regression models exploring perceptions of inserts by sociodemographic and smoking related characteristics<sup>1</sup>

| (n=1766)                                                                | Would read insert   | Would read insert if trying to quit | Inserts make you think about quitting | Inserts might help you quit | Inserts a good way of providing information about quitting | Inserts are an effective way of encouraging smokers to quit | All packs should have inserts |
|-------------------------------------------------------------------------|---------------------|-------------------------------------|---------------------------------------|-----------------------------|------------------------------------------------------------|-------------------------------------------------------------|-------------------------------|
| <b>Gender (ref<sup>2</sup> = male)</b>                                  |                     |                                     |                                       |                             |                                                            |                                                             |                               |
| Female                                                                  | 1.24 (1.02 to 1.50) | 1.11 (0.91 to 1.35)                 | 0.98 (0.81 to 1.19)                   | 0.95 (0.79 to 1.15)         | 1.13 (0.93 to 1.37)                                        | 0.88 (0.73 to 1.07)                                         | 1.20 (0.99 to 1.46)           |
| <b>Age (ref = 16-19)</b>                                                |                     |                                     |                                       |                             |                                                            |                                                             |                               |
| 20-24                                                                   | 1.16 (0.87 to 1.54) | 0.88 (0.66 to 1.18)                 | 1.18 (0.89 to 1.56)                   | 1.19 (0.89 to 1.58)         | 0.87 (0.65 to 1.16)                                        | 0.97 (0.73 to 1.28)                                         | 0.96 (0.72 to 1.29)           |
| 25-34                                                                   | 1.25 (0.97 to 1.60) | 0.83 (0.65 to 1.07)                 | 0.99 (0.78 to 1.26)                   | 1.18 (0.92 to 1.50)         | 0.76 (0.60 to 0.98)                                        | 0.88 (0.69 to 1.12)                                         | 0.84 (0.65 to 1.07)           |
| <b>Education (ref = GCSEs (or equivalent) or none)</b>                  |                     |                                     |                                       |                             |                                                            |                                                             |                               |
| More than GCSEs (or equivalent)                                         | 1.25 (0.99 to 1.58) | 1.12 (0.89 to 1.42)                 | 1.22 (0.97 to 1.54)                   | 1.21 (0.97 to 1.52)         | 1.12 (0.89 to 1.40)                                        | 1.19 (0.95 to 1.50)                                         | 1.10 (0.87 to 1.40)           |
| <b>Ethnicity (ref = White British)</b>                                  |                     |                                     |                                       |                             |                                                            |                                                             |                               |
| White but not British                                                   |                     | 0.70 (0.50 to 0.98)                 | 0.58 (0.41 to 0.81)                   |                             |                                                            |                                                             | 0.62 (0.44 to 0.87)           |
| Black (inc mixed black & white)                                         |                     | 0.92 (0.57 to 1.49)                 | 0.61 (0.38 to 0.98)                   |                             |                                                            |                                                             | 0.99 (0.62 to 1.59)           |
| Asian (inc mixed Asian & white)                                         |                     | 0.67 (0.49 to 0.92)                 | 1.19 (0.87 to 1.63)                   |                             |                                                            |                                                             | 0.70 (0.51 to 0.96)           |
| other or not declared                                                   |                     | 0.84 (0.50 to 1.42)                 | 1.06 (0.64 to 1.78)                   |                             |                                                            |                                                             | 1.08 (0.64 to 1.81)           |
| <b>Dependence (tertiles of HSI) (ref = lower dependence)</b>            |                     |                                     |                                       |                             |                                                            |                                                             |                               |
| Mid dependence                                                          | 1.39 (1.11 to 1.76) |                                     |                                       |                             |                                                            |                                                             | 1.02 (0.80 to 1.29)           |
| Higher dependence                                                       | 1.22 (0.94 to 1.59) |                                     |                                       |                             |                                                            |                                                             | 0.86 (0.66 to 1.12)           |
| <b>Tobacco products smoked (ref = only factory-made cigarettes)</b>     |                     |                                     |                                       |                             |                                                            |                                                             |                               |
| Factory-made and roll-your-own                                          | 1.35 (1.09 to 1.66) | 1.61 (1.30 to 2.00)                 | 1.31 (1.06 to 1.62)                   | 1.31 (1.06 to 1.61)         |                                                            | 1.27 (1.03 to 1.56)                                         |                               |
| Factory-made and other                                                  | 1.20 (0.90 to 1.59) | 1.39 (1.04 to 1.86)                 | 1.22 (0.92 to 1.63)                   | 1.34 (1.01 to 1.78)         |                                                            | 1.20 (0.91 to 1.60)                                         |                               |
| <b>Quit attempt lasting at least 24 hours (ref = no)</b>                |                     |                                     |                                       |                             |                                                            |                                                             |                               |
| Yes, more than six months ago                                           | 1.30 (1.00 to 1.69) | 1.12 (0.86 to 1.45)                 | 1.20 (0.93 to 1.56)                   | 1.05 (0.81 to 1.36)         | 1.16 (0.90 to 1.50)                                        | 1.07 (0.82 to 1.38)                                         | 0.78 (0.60 to 1.01)           |
| Yes, within the last six months                                         | 1.67 (1.29 to 2.15) | 1.51 (1.17 to 1.94)                 | 1.46 (1.14 to 1.88)                   | 1.35 (1.05 to 1.73)         | 1.54 (1.20 to 1.98)                                        | 1.33 (1.04 to 1.71)                                         | 1.06 (0.82 to 1.37)           |
| <b>Efficacy of quit attempt in next 6 months (ref = likely to quit)</b> |                     |                                     |                                       |                             |                                                            |                                                             |                               |
| Likely to make unsuccessful attempt                                     | 1.01 (0.72 to 1.40) | 1.43 (1.00 to 2.06)                 | 0.97 (0.69 to 1.37)                   | 0.92 (0.65 to 1.29)         | 1.46 (1.02 to 2.08)                                        | 1.10 (0.78 to 1.55)                                         | 1.43 (1.00 to 2.04)           |
| Unlikely to make attempt                                                | 0.58 (0.44 to 0.75) | 0.74 (0.55 to 0.99)                 | 0.59 (0.45 to 0.78)                   | 0.51 (0.38 to 0.67)         | 0.76 (0.57 to 1.01)                                        | 0.55 (0.41 to 0.73)                                         | 0.56 (0.42 to 0.74)           |

<sup>1</sup> Blank cells indicate no significant relationship in bivariate analysis; <sup>2</sup> Odds ratios for reference categories are always 1.



**Table 4:** Perceptions of cigarette design (harm, appeal, trial)

|                                            | <b>Standard<br/>cigarette<br/>(SC)<br/>%<sup>1</sup></b> | <b>Cigarette with<br/>warning<br/>(WC)<br/>%<sup>1</sup></b> | <b>Green<br/>Cigarette<br/>(GC)<br/>%<sup>1</sup></b> |
|--------------------------------------------|----------------------------------------------------------|--------------------------------------------------------------|-------------------------------------------------------|
| <b>Harmful to health</b>                   | 38.8                                                     | 69.1*                                                        | 70.2*                                                 |
| <b>Think of dangers</b>                    | 20.9                                                     | 58.1*#                                                       | 53.5*                                                 |
| <b>Unattractive</b>                        | 25.2                                                     | 61.7*                                                        | 68.7*                                                 |
| <b>Unstylish</b>                           | 37.4                                                     | 66.0*                                                        | 69.4*                                                 |
| <b>Not nice to be seen with</b>            | 19.8                                                     | 55.2*                                                        | 60.2*                                                 |
| <b>Not appealing to people my age</b>      | 17.8                                                     | 51.5*                                                        | 57.4*                                                 |
| <b>Unlikely to try (personally)</b>        | 8.9                                                      | 45.4*                                                        | 66.5*                                                 |
| <b>Unlikely to try (for never smokers)</b> | 14.8                                                     | 63.3*                                                        | 71.6*                                                 |

<sup>1</sup> Percentages shown indicate participants choosing one of the three points nearest the undesirable anchor on a seven-point semantic scale.

\* Significant difference in comparison to the standard cigarette (p<0.001)

# Significant difference in comparison to the green cigarette (p<0.05)

**Table 5:** Multilevel and multivariable modelling of perceiving cigarettes as undesirable (n=5298 cigarette evaluations, u=1766 participants)

|                                                                                   |                                                                               | <i>Multivariable model</i> | <i>Multivariable model<br/>+ cigarette*SES interaction</i> |                     |                       |
|-----------------------------------------------------------------------------------|-------------------------------------------------------------------------------|----------------------------|------------------------------------------------------------|---------------------|-----------------------|
|                                                                                   |                                                                               | <i>Odds ratio (95%CI)</i>  | <i>Odds ratio (95%CI)</i>                                  |                     |                       |
|                                                                                   | cons                                                                          | 0.05 (0.04 to 0.07)        | 0.04 (0.03 to 0.06)                                        |                     |                       |
| <b>Cigarette type</b><br>(ref = standard cigarette <sup>1</sup> )                 | warning on cigarette                                                          | 17.71 (13.75 to 22.80)     | 23.29 (16.40 to 33.08)                                     |                     |                       |
|                                                                                   | green cigarette                                                               | 30.88 (23.98 to 39.76)     | 35.41 (24.93 to 50.29)                                     |                     |                       |
| <b>Gender</b> (ref = male)                                                        | Female                                                                        | 1.30 (1.10 to 1.54)        | 1.30 (1.10 to 1.55)                                        |                     |                       |
| <b>SES</b> (ref = higher SES)                                                     | low education AND/OR low economic status                                      | 1.26 (1.06 to 1.50)        | 1.89 (1.18 to 3.04)                                        |                     |                       |
| <b>Ethnicity</b> (ref = White British)                                            | White but not British                                                         | 0.96 (0.72 to 1.30)        | 0.96 (0.72 to 1.30)                                        |                     |                       |
|                                                                                   | Black (inc mixed black & white)                                               | 0.94 (0.62 to 1.42)        | 0.94 (0.62 to 1.42)                                        |                     |                       |
|                                                                                   | Asian (inc mixed Asian & white)                                               | 0.79 (0.60 to 1.05)        | 0.79 (0.60 to 1.05)                                        |                     |                       |
|                                                                                   | other or not declared                                                         | 0.90 (0.58 to 1.42)        | 0.90 (0.57 to 1.42)                                        |                     |                       |
| <b>Product category</b><br>(ref = Factory-made only)                              | Factory-made and roll-your-own cigarettes                                     | 0.78 (0.65 to 0.90)        | 0.77 (0.64 to 0.93)                                        |                     |                       |
|                                                                                   | Factory-made cigarettes and other tobacco products (e.g. cigars, shisha, etc) | 0.73 (0.56 to 0.93)        | 0.72 (0.56 to 0.93)                                        |                     |                       |
| <b>Efficacy</b> (ref = likely to quit)                                            | Not likely to make a quit attempt in next six months                          | 0.62 (0.49 to 0.78)        | 0.61 (0.49 to 0.78)                                        |                     |                       |
|                                                                                   | Likely to make unsuccessful attempt                                           | 1.05 (0.78 to 1.41)        | 1.05 (0.78 to 1.41)                                        |                     |                       |
| <b>Interaction Cigarette type * SES</b><br>(ref = SC*higher SES)                  | WC*low SES                                                                    |                            | 0.52 (0.31 to 0.87)                                        |                     |                       |
|                                                                                   | GC*low SES                                                                    |                            | 0.76 (0.46 to 1.26)                                        |                     |                       |
|                                                                                   | <i>Variation between participants (U(std err))</i>                            | <i>1.14(0.11)</i>          | <i>1.14(0.11)</i>                                          |                     |                       |
| <b>Models varying reference category of cross classified variable<sup>1</sup></b> |                                                                               |                            |                                                            |                     |                       |
| <b>Reference Category:</b>                                                        | <b>SC not low SES</b>                                                         | <b>SC low SES</b>          | <b>WC not low SES</b>                                      | <b>WC low SES</b>   | <b>GC not low SES</b> |
| <b>Cigarette type &amp; SES</b>                                                   |                                                                               |                            |                                                            |                     |                       |
| <b>SC: not low SES</b>                                                            | 1                                                                             | 0.53 (0.33 to 0.85)        | 0.04 (0.03 to 0.06)                                        | 0.04 (0.03 to 0.06) | 0.03 (0.02 to 0.04)   |
| <b>SC: low SES</b>                                                                | 1.89 (1.18 to 3.03)                                                           | 1                          | 0.08 (0.06 to 0.12)                                        | 0.08 (0.06 to 0.12) | 0.05 (0.04 to 0.08)   |
| <b>WC: not low SES</b>                                                            | 23.13 (16.28 to 32.85)                                                        | 12.21 (8.48 to 17.58)      | 1                                                          | 1.01 (0.80 to 1.28) | 0.66 (0.55 to 0.79)   |
| <b>WC: low SES</b>                                                                | 22.83 (15.58 to 33.46)                                                        | 12.05 (8.37 to 17.35)      | 0.99 (0.78 to 1.25)                                        | 1                   | 0.65 (0.52 to 0.82)   |
| <b>GC: not low SES</b>                                                            | 35.09 (24.71 to 49.84)                                                        | 18.52 (12.86 to 26.67)     | 1.52 (1.27 to 1.81)                                        | 1.54 (1.22 to 1.94) | 1                     |
| <b>GC: low SES</b>                                                                | 50.15 (34.29 to 73.35)                                                        | 26.47 (18.35 to 38.19)     | 2.17 (1.72 to 2.74)                                        | 2.20 (1.74 to 2.77) | 1.43 (1.13 to 1.80)   |

<sup>1</sup>Variables included are those in the above models with the exception that cigarette type and SES are replaced with the cross classified variable

1  
2  
3  
4  
5  
6  
7  
8  
9  
10  
11  
12  
13  
14  
15  
16  
17  
18  
19  
20  
21  
22  
23  
24  
25  
26  
27  
28  
29  
30  
31  
32  
33  
34  
35  
36  
37  
38  
39  
40  
41  
42  
43  
44  
45  
46  
47  
48  
49  
50  
51  
52  
53  
54  
55  
56  
57  
58  
59  
60

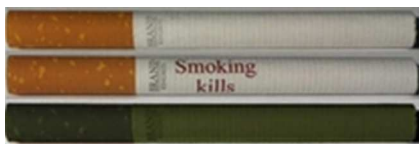

Figure 1: Standard cigarette, warning cigarette and green cigarette

17x5mm (300 x 300 DPI)

For peer review only

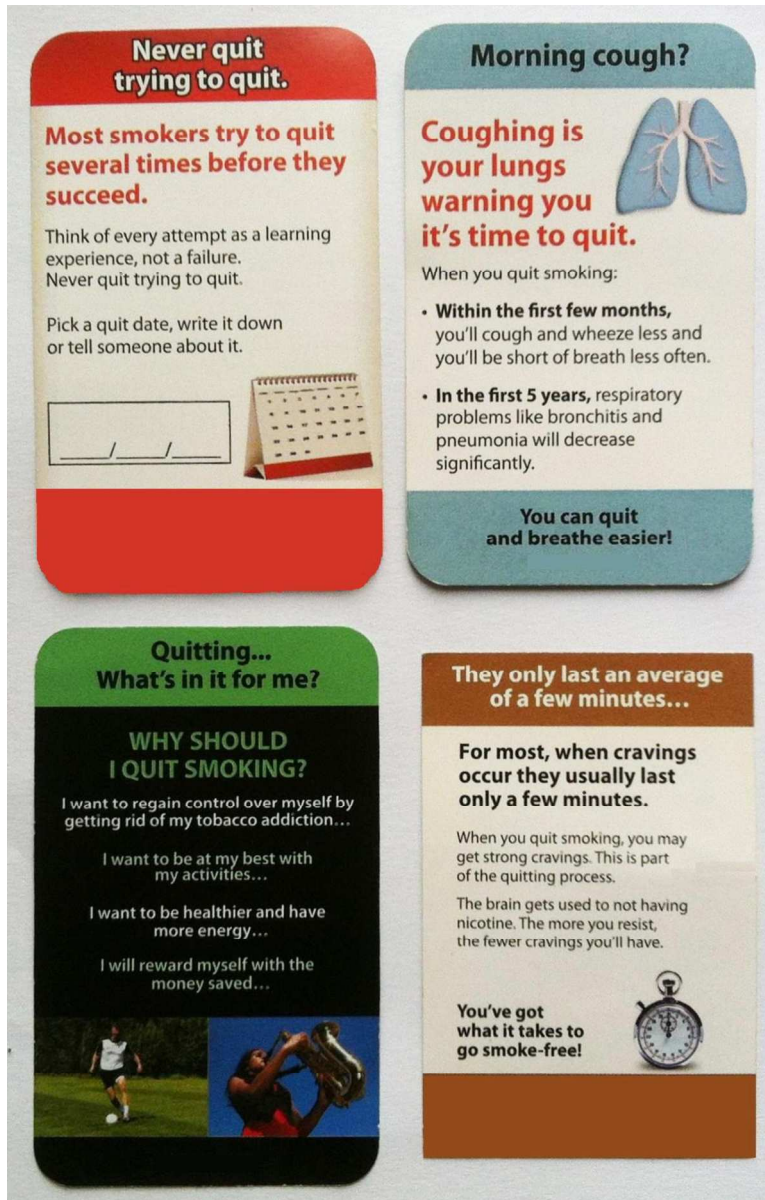

Figure 2: Pack inserts highlighting the benefits of quitting or providing tips on how to do so

142x222mm (300 x 300 DPI)

**STROBE 2007 (v4) checklist of items to be included in reports of observational studies in epidemiology\***  
**Checklist for cohort, case-control, and cross-sectional studies (combined)**

| Section/Topic            | Item # | Recommendation                                                                                                                                                                                               | Reported on page # |
|--------------------------|--------|--------------------------------------------------------------------------------------------------------------------------------------------------------------------------------------------------------------|--------------------|
| Title and abstract       | 1      | (a) Indicate the study's design with a commonly used term in the title or the abstract                                                                                                                       | 2                  |
|                          |        | (b) Provide in the abstract an informative and balanced summary of what was done and what was found                                                                                                          | 2-3                |
| <b>Introduction</b>      |        |                                                                                                                                                                                                              |                    |
| Background/rationale     | 2      | Explain the scientific background and rationale for the investigation being reported                                                                                                                         | 4-5                |
| Objectives               | 3      | State specific objectives, including any pre-specified hypotheses                                                                                                                                            | 6                  |
| <b>Methods</b>           |        |                                                                                                                                                                                                              |                    |
| Study design             | 4      | Present key elements of study design early in the paper                                                                                                                                                      | 6                  |
| Setting                  | 5      | Describe the setting, locations, and relevant dates, including periods of recruitment, exposure, follow-up, and data collection                                                                              | 6                  |
| Participants             | 6      | <i>Cross-sectional study</i> —Give the eligibility criteria, and the sources and methods of selection of participants                                                                                        | 6,7                |
| Variables                | 7      | Clearly define all outcomes, exposures, predictors, potential confounders, and effect modifiers. Give diagnostic criteria, if applicable                                                                     | 8-12               |
| Data sources/measurement | 8*     | For each variable of interest, give sources of data and details of methods of assessment (measurement). Describe comparability of assessment methods if there is more than one group                         | 9-12               |
| Bias                     | 9      | Describe any efforts to address potential sources of bias                                                                                                                                                    | 6                  |
| Study size               | 10     | Explain how the study size was arrived at                                                                                                                                                                    | 6                  |
| Quantitative variables   | 11     | Explain how quantitative variables were handled in the analyses. If applicable, describe which groupings were chosen and why                                                                                 | 10-13              |
| Statistical methods      | 12     | (a) Describe all statistical methods, including those used to control for confounding                                                                                                                        | 12-13              |
|                          |        | (b) Describe any methods used to examine subgroups and interactions                                                                                                                                          | 12-13              |
|                          |        | (c) Explain how missing data were addressed                                                                                                                                                                  | 7                  |
|                          |        | (d) <i>Cross-sectional study</i> —If applicable, describe analytical methods taking account of sampling strategy                                                                                             | NA                 |
|                          |        | (e) Describe any sensitivity analyses                                                                                                                                                                        | NA                 |
| <b>Results</b>           |        |                                                                                                                                                                                                              |                    |
| Participants             | 13*    | (a) Report numbers of individuals at each stage of study—eg numbers potentially eligible, examined for eligibility, confirmed eligible, included in the study, completing follow-up, and analysed            | 6                  |
|                          |        | (b) Give reasons for non-participation at each stage                                                                                                                                                         | 6                  |
|                          |        | (c) Consider use of a flow diagram                                                                                                                                                                           | NA                 |
| Descriptive data         | 14*    | (a) Give characteristics of study participants (eg demographic, clinical, social) and information on exposures and potential confounders                                                                     | 27-28              |
|                          |        | (b) Indicate number of participants with missing data for each variable of interest                                                                                                                          | 7                  |
| Outcome data             | 15*    | <i>Cross-sectional study</i> —Report numbers of outcome events or summary measures                                                                                                                           | 13-17              |
| Main results             | 16     | (a) Give unadjusted estimates and, if applicable, confounder-adjusted estimates and their precision (eg, 95% confidence interval). Make clear which confounders were adjusted for and why they were included | 13-17              |
|                          |        | (b) Report category boundaries when continuous variables were                                                                                                                                                | 30,32              |

|                          |    |                                                                                                                                                                            |             |
|--------------------------|----|----------------------------------------------------------------------------------------------------------------------------------------------------------------------------|-------------|
|                          |    | categorized                                                                                                                                                                |             |
|                          |    | (c) If relevant, consider translating estimates of relative risk into absolute risk for a meaningful time period                                                           | NA          |
| Other analyses           | 17 | Report other analyses done—eg analyses of subgroups and interactions, and sensitivity analyses                                                                             | 12-13,29,31 |
| <b>Discussion</b>        |    |                                                                                                                                                                            |             |
| Key results              | 18 | Summarise key results with reference to study objectives                                                                                                                   | 17-20       |
| Limitations              | 19 | Discuss limitations of the study, taking into account sources of potential bias or imprecision. Discuss both direction and magnitude of any potential bias                 | 20          |
| Interpretation           | 20 | Give a cautious overall interpretation of results considering objectives, limitations, multiplicity of analyses, results from similar studies, and other relevant evidence | 20          |
| Generalisability         | 21 | Discuss the generalisability (external validity) of the study results                                                                                                      | 17-20       |
| <b>Other information</b> |    |                                                                                                                                                                            |             |
| Funding                  | 22 | Give the source of funding and the role of the funders for the present study and, if applicable, for the original study on which the present article is based              | 21          |

\*Give information separately for cases and controls in case-control studies and, if applicable, for exposed and unexposed groups in cohort and cross-sectional studies.

**Note:** An Explanation and Elaboration article discusses each checklist item and gives methodological background and published examples of transparent reporting. The STROBE checklist is best used in conjunction with this article (freely available on the Web sites of PLoS Medicine at <http://www.plosmedicine.org/>, Annals of Internal Medicine at <http://www.annals.org/>, and Epidemiology at <http://www.epidem.com/>). Information on the STROBE Initiative is available at [www.strobe-statement.org](http://www.strobe-statement.org).
